# Supplementary material for: Deciphering The Molecular Mechanism of Long Non-Coding RNA HIFA-AS1 Regulating Pancreatic Cancer Cells
Source: Research Square preprint supplement (doi:10.21203/rs.3.rs-533849/v1), 2021-06-10
Supplement: Supplementary file 2 [file 2fcaeed6917b178eec3eeeef.xlsx]

## Sheet: PANC_1_OEvsPANC_1_NC
N	Accession	Name	Samesets	Diff_state	Envidence_num	PANC_1_OE:PANC_1_NC	PVal PANC_1_OE:PANC_1_NC	GO_function(Biological_Process)	GO_function(Cellular_Component)	GO_function(Molecular_Function)	COG_function	Kegg_function	GO_enrichment(Biological_Process)	GO_enrichment(Cellular_Component)	GO_enrichment(Molecular_Function)	Kegg_enrichment
3	sp|Q14204|DYHC1_HUMAN	Cytoplasmic dynein 1 heavy chain 1 OS=Homo sapiens OX=9606 GN=DYNC1H1 PE=1 SV=5		up	1	1.23952	0.000575857	cellular process;metabolic process;establishment of localization;localization;cellular component organization or biogenesis;immune system process	macromolecular complex;extracellular region;cell;organelle;organelle part;cell part;extracellular region part	catalytic activity;binding	Cytoskeleton ;	Vasopressin-regulated water reabsorption;Phagosome	GO:0051653,spindle localization;GO:0051325,interphase;GO:0070085,glycosylation;GO:0005975,carbohydrate metabolic process;GO:0022613,ribonucleoprotein complex biogenesis;GO:0019882,antigen processing and presentation;GO:0018193,peptidyl-amino acid modification;GO:0022607,cellular component assembly;GO:0016192,vesicle-mediated transport;GO:0006888,ER to Golgi vesicle-mediated transport;GO:0051234,e…	GO:0043226,organelle;GO:0044424,intracellular part;GO:0005737,cytoplasm;GO:0044446,intracellular organelle part;GO:0044464,cell part;GO:0005875,microtubule associated complex;GO:0031988,membrane-bounded vesicle;GO:0043227,membrane-bounded organelle;GO:0032991,macromolecular complex;GO:0005829,cytosol;GO:0005813,centrosome;GO:0043234,protein complex;GO:0044422,organelle part;GO:0005815,microtubule…	GO:0030554,adenyl nucleotide binding;GO:0005515,protein binding;GO:0005488,binding;GO:0001882,nucleoside binding;GO:0032555,purine ribonucleotide binding;GO:0003824,catalytic activity;GO:0016817,hydrolase activity, acting on acid anhydrides;GO:0016787,hydrolase activity;GO:0001883,purine nucleoside binding;GO:0003774,motor activity;GO:0000166,nucleotide binding;GO:0032559,adenyl ribonucleotide bi…	ko04145,Phagosome;ko04962,Vasopressin-regulated water reabsorption
7	sp|Q13813|SPTN1_HUMAN	Spectrin alpha chain, non-erythrocytic 1 OS=Homo sapiens OX=9606 GN=SPTAN1 PE=1 SV=3		down	1	0.723397	1.94336e-10	cellular process;localization;multicellular organismal process;negative regulation of biological process;signaling;locomotion;metabolic process;developmental process;death;establishment of localization;cellular component organization or biogenesis;regulation of biological process;biological regulation;immune system process;response to stimulus	cell;extracellular region;macromolecular complex;organelle;cell part;organelle part;extracellular region part	structural molecule activity;binding	Signal transduction mechanisms ; Cytoskeleton ; Cell cycle control, cell division, chromosome partitioning ; General function prediction only ;	Tight junction	GO:0043549,regulation of kinase activity;GO:0000186,activation of MAPKK activity;GO:0048856,anatomical structure development;GO:0043283,biopolymer metabolic process;GO:0048519,negative regulation of biological process;GO:0000902,cell morphogenesis;GO:0043242,negative regulation of protein complex disassembly;GO:0044249,cellular biosynthetic process;GO:0051129,negative regulation of cellular compo…	GO:0016328,lateral plasma membrane;GO:0005623,cell;GO:0043230,extracellular organelle;GO:0005886,plasma membrane;GO:0030018,Z disc;GO:0030863,cortical cytoskeleton;GO:0030054,cell junction;GO:0031982,vesicle;GO:0005911,cell-cell junction;GO:0044444,cytoplasmic part;GO:0043231,intracellular membrane-bounded organelle;GO:0005913,cell-cell adherens junction;GO:0043292,contractile fiber;GO:0065010,ex…	GO:0043167,ion binding;GO:0005198,structural molecule activity;GO:0005509,calcium ion binding;GO:0005515,protein binding;GO:0005488,binding;GO:0046872,metal ion binding;GO:0005200,structural constituent of cytoskeleton;GO:0008092,cytoskeletal protein binding;GO:0047485,protein N-terminus binding;GO:0032403,protein complex binding;GO:0005516,calmodulin binding;GO:0043169,cation binding;GO:0046982,…	ko04530,Tight junction
9	sp|Q01082|SPTB2_HUMAN	Spectrin beta chain, non-erythrocytic 1 OS=Homo sapiens OX=9606 GN=SPTBN1 PE=1 SV=2		down	1	0.675216	2.79259e-08	developmental process;metabolic process;establishment of localization;immune system process;biological regulation;response to stimulus;cellular component organization or biogenesis;regulation of biological process;cellular process;multicellular organismal process;negative regulation of biological process;locomotion;signaling;localization	cell;extracellular region;organelle;membrane-enclosed lumen;organelle part;cell part;extracellular region part	binding;structural molecule activity	Cytoskeleton ;	Tight junction	GO:0007265,Ras protein signal transduction;GO:0006893,Golgi to plasma membrane transport;GO:0034960,cellular biopolymer metabolic process;GO:0008064,regulation of actin polymerization or depolymerization;GO:0008286,insulin receptor signaling pathway;GO:0033036,macromolecule localization;GO:0033205,cytokinesis during cell cycle;GO:0006468,protein amino acid phosphorylation;GO:0032870,cellular resp…	GO:0005829,cytosol;GO:0030424,axon;GO:0031252,cell leading edge;GO:0043227,membrane-bounded organelle;GO:0005730,nucleolus;GO:0005938,cell cortex;GO:0031988,membrane-bounded vesicle;GO:0044464,cell part;GO:0070013,intracellular organelle lumen;GO:0044446,intracellular organelle part;GO:0031253,cell projection membrane;GO:0005737,cytoplasm;GO:0044449,contractile fiber part;GO:0008091,spectrin;GO:0…	GO:0005543,phospholipid binding;GO:0008289,lipid binding;GO:0003779,actin binding;GO:0005200,structural constituent of cytoskeleton;GO:0008092,cytoskeletal protein binding;GO:0005516,calmodulin binding;GO:0005198,structural molecule activity;GO:0051020,GTPase binding;GO:0019899,enzyme binding;GO:0005515,protein binding;GO:0005488,binding	ko04530,Tight junction
16	sp|P46940|IQGA1_HUMAN	Ras GTPase-activating-like protein IQGAP1 OS=Homo sapiens OX=9606 GN=IQGAP1 PE=1 SV=1		down	1	0.718617	2.7944e-06	cellular process;localization;negative regulation of biological process;multicellular organismal process;signaling;developmental process;metabolic process;establishment of localization;regulation of biological process;biological regulation;response to stimulus	macromolecular complex;cell;extracellular region;extracellular region part;organelle part;cell part;organelle	binding;enzyme regulator activity	Cell cycle control, cell division, chromosome partitioning ; Signal transduction mechanisms ;	Regulation of actin cytoskeleton;Adherens junction	GO:0065007,biological regulation;GO:0007166,cell surface receptor linked signal transduction;GO:0009987,cellular process;GO:0046883,regulation of hormone secretion;GO:0006112,energy reserve metabolic process;GO:0043087,regulation of GTPase activity;GO:0050790,regulation of catalytic activity;GO:0031323,regulation of cellular metabolic process;GO:0006091,generation of precursor metabolites and ene…	GO:0030055,cell-substrate junction;GO:0009898,internal side of plasma membrane;GO:0019897,extrinsic to plasma membrane;GO:0005856,cytoskeleton;GO:0042995,cell projection;GO:0005884,actin filament;GO:0065010,extracellular membrane-bounded organelle;GO:0044459,plasma membrane part;GO:0043232,intracellular non-membrane-bounded organelle;GO:0005576,extracellular region;GO:0015629,actin cytoskeleton;G…	GO:0005515,protein binding;GO:0019902,phosphatase binding;GO:0051020,GTPase binding;GO:0005509,calcium ion binding;GO:0019903,protein phosphatase binding;GO:0019887,protein kinase regulator activity;GO:0005543,phospholipid binding;GO:0019899,enzyme binding;GO:0043539,protein serine/threonine kinase activator activity;GO:0043169,cation binding;GO:0019900,kinase binding;GO:0019904,protein domain sp…	ko04810,Regulation of actin cytoskeleton;ko04520,Adherens junction
17	sp|Q8IVF2|AHNK2_HUMAN	Protein AHNAK2 OS=Homo sapiens OX=9606 GN=AHNAK2 PE=1 SV=2		down	1	0.809658	0.000431665	cellular process;cellular component organization or biogenesis;response to stimulus	organelle;cell part;organelle part;cell	binding			GO:0050896,response to stimulus;GO:0042060,wound healing;GO:0016044,membrane organization;GO:0009611,response to wounding;GO:0007009,plasma membrane organization;GO:0006950,response to stress;GO:0009605,response to external stimulus;GO:0016043,cellular component organization;GO:0009987,cellular process	GO:0043227,membrane-bounded organelle;GO:0030315,T-tubule;GO:0031988,membrane-bounded vesicle;GO:0031410,cytoplasmic vesicle;GO:0042383,sarcolemma;GO:0005737,cytoplasm;GO:0044449,contractile fiber part;GO:0044425,membrane part;GO:0043226,organelle;GO:0044424,intracellular part;GO:0044464,cell part;GO:0044446,intracellular organelle part;GO:0031674,I band;GO:0044422,organelle part;GO:0030016,myofi…	GO:0005515,protein binding;GO:0005488,binding
18	sp|P49327|FAS_HUMAN	Fatty acid synthase OS=Homo sapiens OX=9606 GN=FASN PE=1 SV=3		up	1	1.47741	0.000764766	positive regulation of biological process;developmental process;metabolic process;response to stimulus;biological regulation;regulation of biological process;cellular process;multicellular organismal process	extracellular region;cell;extracellular region part;cell part;organelle	binding;catalytic activity	Secondary metabolites biosynthesis, transport and catabolism ;	Metabolic pathways;Insulin signaling pathway;Fatty acid biosynthesis	GO:0006082,organic acid metabolic process;GO:0044255,cellular lipid metabolic process;GO:0006662,glycerol ether metabolic process;GO:0046504,glycerol ether biosynthetic process;GO:0060348,bone development;GO:0044238,primary metabolic process;GO:0006631,fatty acid metabolic process;GO:0006575,cellular amino acid derivative metabolic process;GO:0006752,group transfer coenzyme metabolic process;GO:0…	GO:0043231,intracellular membrane-bounded organelle;GO:0043227,membrane-bounded organelle;GO:0031410,cytoplasmic vesicle;GO:0065010,extracellular membrane-bounded organelle;GO:0031988,membrane-bounded vesicle;GO:0005829,cytosol;GO:0043229,intracellular organelle;GO:0005737,cytoplasm;GO:0016023,cytoplasmic membrane-bounded vesicle;GO:0044424,intracellular part;GO:0043226,organelle;GO:0070062,extra…	GO:0005515,protein binding;GO:0016614,oxidoreductase activity, acting on CH-OH group of donors;GO:0005488,binding;GO:0016836,hydro-lyase activity;GO:0016790,thiolester hydrolase activity;GO:0016491,oxidoreductase activity;GO:0016835,carbon-oxygen lyase activity;GO:0008415,acyltransferase activity;GO:0016616,oxidoreductase activity, acting on the CH-OH group of donors, NAD or NADP as acceptor;GO:0…	ko04910,Insulin signaling pathway;ko00061,Fatty acid biosynthesis;ko01100,Metabolic pathways
19	sp|P18206|VINC_HUMAN	Vinculin OS=Homo sapiens OX=9606 GN=VCL PE=1 SV=4		up	1	1.66967	0.000202101	localization;locomotion;multicellular organismal process;negative regulation of biological process;cellular process;regulation of biological process;cellular component organization or biogenesis;growth;response to stimulus;biological regulation;biological adhesion;establishment of localization;developmental process	cell;extracellular region;macromolecular complex;organelle;cell part;organelle part;extracellular region part	structural molecule activity;binding		Adherens junction;Amoebiasis;Leukocyte transendothelial migration;Regulation of actin cytoskeleton;Bacterial invasion of epithelial cells;Shigellosis;Focal adhesion	GO:0034109,homotypic cell-cell adhesion;GO:0051649,establishment of localization in cell;GO:0008104,protein localization;GO:0044085,cellular component biogenesis;GO:0033036,macromolecule localization;GO:0022008,neurogenesis;GO:0016337,cell-cell adhesion;GO:0032940,secretion by cell;GO:0001775,cell activation;GO:0048468,cell development;GO:0051271,negative regulation of cell motion;GO:0007596,bloo…	GO:0043296,apical junction complex;GO:0014704,intercalated disc;GO:0016020,membrane;GO:0044421,extracellular region part;GO:0016327,apicolateral plasma membrane;GO:0005622,intracellular;GO:0045121,membrane raft;GO:0005903,brush border;GO:0043234,protein complex;GO:0030016,myofibril;GO:0005829,cytosol;GO:0032991,macromolecular complex;GO:0070161,anchoring junction;GO:0043227,membrane-bounded organ…	GO:0008092,cytoskeletal protein binding;GO:0051015,actin filament binding;GO:0003779,actin binding;GO:0045296,cadherin binding;GO:0045294,alpha-catenin binding;GO:0019899,enzyme binding;GO:0008013,beta-catenin binding;GO:0005488,binding;GO:0005515,protein binding;GO:0050839,cell adhesion molecule binding;GO:0005198,structural molecule activity;GO:0031625,ubiquitin protein ligase binding	ko04520,Adherens junction;ko04510,Focal adhesion;ko04810,Regulation of actin cytoskeleton;ko05131,Shigellosis;ko05100,Bacterial invasion of epithelial cells;ko05146,Amoebiasis;ko04670,Leukocyte transendothelial migration
20	sp|Q6P2Q9|PRP8_HUMAN	Pre-mRNA-processing-splicing factor 8 OS=Homo sapiens OX=9606 GN=PRPF8 PE=1 SV=2		up	1	1.25452	0.00322863	metabolic process;cellular process;multi-organism process;response to stimulus;cellular component organization or biogenesis	cell;macromolecular complex;organelle part;cell part;membrane-enclosed lumen;organelle	binding;catalytic activity	RNA processing and modification ;	Spliceosome	GO:0000377,RNA splicing, via transesterification reactions with bulged adenosine as nucleophile;GO:0034960,cellular biopolymer metabolic process;GO:0044238,primary metabolic process;GO:0022613,ribonucleoprotein complex biogenesis;GO:0034622,cellular macromolecular complex assembly;GO:0010926,anatomical structure formation;GO:0006396,RNA processing;GO:0022607,cellular component assembly;GO:0010467…	GO:0016604,nuclear body;GO:0031981,nuclear lumen;GO:0071013,catalytic step 2 spliceosome;GO:0044422,organelle part;GO:0005682,U5 snRNP;GO:0030529,ribonucleoprotein complex;GO:0044451,nucleoplasm part;GO:0016020,membrane;GO:0005681,spliceosomal complex;GO:0005622,intracellular;GO:0044428,nuclear part;GO:0031974,membrane-enclosed lumen;GO:0005623,cell;GO:0043233,organelle lumen;GO:0043229,intracell…	GO:0003824,catalytic activity;GO:0017069,snRNA binding;GO:0043130,ubiquitin binding;GO:0003723,RNA binding;GO:0032182,small conjugating protein binding;GO:0030619,U1 snRNA binding;GO:0017070,U6 snRNA binding;GO:0003676,nucleic acid binding;GO:0005488,binding;GO:0005515,protein binding	ko03040,Spliceosome
24	sp|P02545|LMNA_HUMAN	Prelamin-A/C OS=Homo sapiens OX=9606 GN=LMNA PE=1 SV=1		down	1	0.633963	0.000118826	multicellular organismal process;locomotion;localization;cellular process;biological regulation;response to stimulus;cellular component organization or biogenesis;regulation of biological process;death;metabolic process;developmental process;positive regulation of biological process	organelle part;cell part;membrane-enclosed lumen;organelle;cell;macromolecular complex	binding;structural molecule activity		Dilated cardiomyopathy;Hypertrophic cardiomyopathy (HCM);Arrhythmogenic right ventricular cardiomyopathy (ARVC)	GO:0006996,organelle organization;GO:0030334,regulation of cell migration;GO:0022411,cellular component disassembly;GO:0051239,regulation of multicellular organismal process;GO:0016044,membrane organization;GO:0006915,apoptosis;GO:0051324,prophase;GO:0051179,localization;GO:0007517,muscle organ development;GO:0051081,nuclear envelope disassembly;GO:0000226,microtubule cytoskeleton organization;GO…	GO:0005638,lamin filament;GO:0012505,endomembrane system;GO:0043233,organelle lumen;GO:0005623,cell;GO:0031090,organelle membrane;GO:0044444,cytoplasmic part;GO:0044428,nuclear part;GO:0043231,intracellular membrane-bounded organelle;GO:0005856,cytoskeleton;GO:0005637,nuclear inner membrane;GO:0043229,intracellular organelle;GO:0043228,non-membrane-bounded organelle;GO:0005634,nucleus;GO:0043232,…	GO:0005515,protein binding;GO:0005488,binding;GO:0005198,structural molecule activity	ko05412,Arrhythmogenic right ventricular cardiomyopathy (ARVC);ko05414,Dilated cardiomyopathy;ko05410,Hypertrophic cardiomyopathy (HCM)
25	sp|P08238|HS90B_HUMAN	Heat shock protein HSP 90-beta OS=Homo sapiens OX=9606 GN=HSP90AB1 PE=1 SV=4		up	1	1.34985	0.000435066	cellular component organization or biogenesis;reproduction;regulation of biological process;biological regulation;viral reproduction;metabolic process;developmental process;death;localization;multicellular organismal process;negative regulation of biological process;multi-organism process;signaling;reproductive process;immune system process;response to stimulus;establishment of localization;posit…	organelle;cell part;extracellular region part;macromolecular complex;extracellular region;cell;membrane-enclosed lumen;organelle part	enzyme regulator activity;binding	Posttranslational modification, protein turnover, chaperones ;	NOD-like receptor signaling pathway;Pathways in cancer;Protein processing in endoplasmic reticulum;Progesterone-mediated oocyte maturation;Antigen processing and presentation;Prostate cancer	GO:0048522,positive regulation of cellular process;GO:0050896,response to stimulus;GO:0051704,multi-organism process;GO:0007411,axon guidance;GO:0044260,cellular macromolecule metabolic process;GO:0044093,positive regulation of molecular function;GO:0042176,regulation of protein catabolic process;GO:0032502,developmental process;GO:0031325,positive regulation of cellular metabolic process;GO:0052…	GO:0043229,intracellular organelle;GO:0016023,cytoplasmic membrane-bounded vesicle;GO:0044463,cell projection part;GO:0005634,nucleus;GO:0005765,lysosomal membrane;GO:0070062,extracellular vesicular exosome;GO:0005576,extracellular region;GO:0044459,plasma membrane part;GO:0043231,intracellular membrane-bounded organelle;GO:0016324,apical plasma membrane;GO:0065010,extracellular membrane-bounded …	GO:0032555,purine ribonucleotide binding;GO:0030234,enzyme regulator activity;GO:0051082,unfolded protein binding;GO:0030235,nitric-oxide synthase regulator activity;GO:0005515,protein binding;GO:0005488,binding;GO:0005102,receptor binding;GO:0003725,double-stranded RNA binding;GO:0030554,adenyl nucleotide binding;GO:0032554,purine deoxyribonucleotide binding;GO:0003676,nucleic acid binding;GO:00…	ko05215,Prostate cancer;ko04621,NOD-like receptor signaling pathway;ko04914,Progesterone-mediated oocyte maturation;ko04612,Antigen processing and presentation;ko05200,Pathways in cancer;ko04141,Protein processing in endoplasmic reticulum
26	sp|P14618|KPYM_HUMAN	Pyruvate kinase PKM OS=Homo sapiens OX=9606 GN=PKM PE=1 SV=4		down	1	0.812568	0.000161812	response to stimulus;multicellular organismal process;growth;metabolic process;developmental process;death;cellular process	extracellular region part;cell part;organelle;extracellular region;cell	binding;catalytic activity	Carbohydrate transport and metabolism ;	Metabolic pathways;Glycolysis / Gluconeogenesis;Type II diabetes mellitus;Pyruvate metabolism;Purine metabolism;Microbial metabolism in diverse environments	GO:0042060,wound healing;GO:0050896,response to stimulus;GO:0006163,purine nucleotide metabolic process;GO:0040007,growth;GO:0009888,tissue development;GO:0001889,liver development;GO:0046034,ATP metabolic process;GO:0048513,organ development;GO:0016265,death;GO:0042455,ribonucleoside biosynthetic process;GO:0042451,purine nucleoside biosynthetic process;GO:0031667,response to nutrient levels;GO:…	GO:0005829,cytosol;GO:0031988,membrane-bounded vesicle;GO:0042995,cell projection;GO:0065010,extracellular membrane-bounded organelle;GO:0043231,intracellular membrane-bounded organelle;GO:0043209,myelin sheath;GO:0043227,membrane-bounded organelle;GO:0044459,plasma membrane part;GO:0005576,extracellular region;GO:0044464,cell part;GO:0044425,membrane part;GO:0070062,extracellular vesicular exoso…	GO:0032559,adenyl ribonucleotide binding;GO:0016773,phosphotransferase activity, alcohol group as acceptor;GO:0001883,purine nucleoside binding;GO:0043169,cation binding;GO:0000166,nucleotide binding;GO:0000287,magnesium ion binding;GO:0017076,purine nucleotide binding;GO:0032553,ribonucleotide binding;GO:0005524,ATP binding;GO:0016301,kinase activity;GO:0001882,nucleoside binding;GO:0043531,ADP …	ko00230,Purine metabolism;ko04930,Type II diabetes mellitus;ko00010,Glycolysis / Gluconeogenesis;ko01120,Microbial metabolism in diverse environments;ko00620,Pyruvate metabolism;ko01100,Metabolic pathways
30	sp|P05787|K2C8_HUMAN	Keratin, type II cytoskeletal 8 OS=Homo sapiens OX=9606 GN=KRT8 PE=1 SV=7		up	1	2.34633	1.77164e-05	viral reproduction;response to stimulus;biological regulation;regulation of biological process;cellular component organization or biogenesis;developmental process;multi-organism process;signaling;multicellular organismal process;cellular process	macromolecular complex;extracellular region;cell;extracellular region part;cell part;organelle;organelle part;membrane-enclosed lumen	structural molecule activity;binding			GO:0051704,multi-organism process;GO:0050896,response to stimulus;GO:0007010,cytoskeleton organization;GO:0007154,cell communication;GO:0009790,embryonic development;GO:0048513,organ development;GO:0022607,cellular component assembly;GO:0045214,sarcomere organization;GO:0009792,embryonic development ending in birth or egg hatching;GO:0009888,tissue development;GO:0009415,response to water;GO:0010…	GO:0016010,dystrophin-associated glycoprotein complex;GO:0034399,nuclear periphery;GO:0031674,I band;GO:0005882,intermediate filament;GO:0043234,protein complex;GO:0030016,myofibril;GO:0044422,organelle part;GO:0031981,nuclear lumen;GO:0005622,intracellular;GO:0031974,membrane-enclosed lumen;GO:0044430,cytoskeletal part;GO:0044421,extracellular region part;GO:0016020,membrane;GO:0016363,nuclear m…	GO:0032403,protein complex binding;GO:0005198,structural molecule activity;GO:0005515,protein binding;GO:0005488,binding
31	sp|Q14980|NUMA1_HUMAN	Nuclear mitotic apparatus protein 1 OS=Homo sapiens OX=9606 GN=NUMA1 PE=1 SV=2		down	1	0.706943	1.52512e-05	cellular process;developmental process;establishment of localization;cellular component organization or biogenesis;localization;multicellular organismal process	organelle part;cell part;extracellular region part;organelle;membrane-enclosed lumen;cell;extracellular region	binding;structural molecule activity			GO:0002009,morphogenesis of an epithelium;GO:0048856,anatomical structure development;GO:0051301,cell division;GO:0007067,mitosis;GO:0016043,cellular component organization;GO:0048729,tissue morphogenesis;GO:0007017,microtubule-based process;GO:0030154,cell differentiation;GO:0030324,lung development;GO:0048869,cellular developmental process;GO:0000278,mitotic cell cycle;GO:0051325,interphase;GO:…	GO:0005856,cytoskeleton;GO:0065010,extracellular membrane-bounded organelle;GO:0042995,cell projection;GO:0043231,intracellular membrane-bounded organelle;GO:0030425,dendrite;GO:0043232,intracellular non-membrane-bounded organelle;GO:0005576,extracellular region;GO:0005634,nucleus;GO:0043228,non-membrane-bounded organelle;GO:0070062,extracellular vesicular exosome;GO:0043229,intracellular organel…	GO:0005515,protein binding;GO:0005488,binding;GO:0008092,cytoskeletal protein binding;GO:0005198,structural molecule activity;GO:0008017,microtubule binding;GO:0015631,tubulin binding
35	sp|P13639|EF2_HUMAN	Elongation factor 2 OS=Homo sapiens OX=9606 GN=EEF2 PE=1 SV=4		up	1	1.96839	3.19946e-06	developmental process;metabolic process;cellular process;response to stimulus;immune system process;multicellular organismal process;cell proliferation	cell part;extracellular region part;organelle;extracellular region;cell;macromolecular complex	catalytic activity;binding	Translation, ribosomal structure and biogenesis ;		GO:0010467,gene expression;GO:0043284,biopolymer biosynthetic process;GO:0009059,macromolecule biosynthetic process;GO:0006936,muscle contraction;GO:0007399,nervous system development;GO:0006950,response to stress;GO:0018193,peptidyl-amino acid modification;GO:0044237,cellular metabolic process;GO:0051716,cellular response to stimulus;GO:0048534,hemopoietic or lymphoid organ development;GO:003009…	GO:0005737,cytoplasm;GO:0043229,intracellular organelle;GO:0044425,membrane part;GO:0070062,extracellular vesicular exosome;GO:0043226,organelle;GO:0043228,non-membrane-bounded organelle;GO:0044424,intracellular part;GO:0005634,nucleus;GO:0044464,cell part;GO:0043232,intracellular non-membrane-bounded organelle;GO:0005576,extracellular region;GO:0043231,intracellular membrane-bounded organelle;GO…	GO:0003824,catalytic activity;GO:0016817,hydrolase activity, acting on acid anhydrides;GO:0016787,hydrolase activity;GO:0003746,translation elongation factor activity;GO:0043021,ribonucleoprotein binding;GO:0032555,purine ribonucleotide binding;GO:0019901,protein kinase binding;GO:0003676,nucleic acid binding;GO:0005488,binding;GO:0043022,ribosome binding;GO:0032561,guanyl ribonucleotide binding;…
37	sp|P11216|PYGB_HUMAN	Glycogen phosphorylase, brain form OS=Homo sapiens OX=9606 GN=PYGB PE=1 SV=5		down	1	0.823887	5.33416e-06	metabolic process;cellular process	organelle;cell part;extracellular region part;extracellular region;cell	binding;catalytic activity	Carbohydrate transport and metabolism ;	Insulin signaling pathway;Starch and sucrose metabolism	GO:0044264,cellular polysaccharide metabolic process;GO:0009056,catabolic process;GO:0043285,biopolymer catabolic process;GO:0009057,macromolecule catabolic process;GO:0043283,biopolymer metabolic process;GO:0009251,glucan catabolic process;GO:0006073,cellular glucan metabolic process;GO:0005980,glycogen catabolic process;GO:0044237,cellular metabolic process;GO:0044042,glucan metabolic process;G…	GO:0031988,membrane-bounded vesicle;GO:0065010,extracellular membrane-bounded organelle;GO:0043227,membrane-bounded organelle;GO:0043230,extracellular organelle;GO:0005623,cell;GO:0031982,vesicle;GO:0043226,organelle;GO:0044424,intracellular part;GO:0070062,extracellular vesicular exosome;GO:0005737,cytoplasm;GO:0005622,intracellular;GO:0044421,extracellular region part;GO:0044464,cell part;GO:00…	GO:0019842,vitamin binding;GO:0030170,pyridoxal phosphate binding;GO:0005488,binding;GO:0005515,protein binding;GO:0005496,steroid binding;GO:0016757,transferase activity, transferring glycosyl groups;GO:0016758,transferase activity, transferring hexosyl groups;GO:0008289,lipid binding;GO:0070279,vitamin B6 binding;GO:0016740,transferase activity;GO:0048037,cofactor binding;GO:0003824,catalytic a…	ko04910,Insulin signaling pathway;ko00500,Starch and sucrose metabolism
39	sp|P34932|HSP74_HUMAN	Heat shock 70 kDa protein 4 OS=Homo sapiens OX=9606 GN=HSPA4 PE=1 SV=4		up	1	1.57785	0.0126743	response to stimulus;cellular component organization or biogenesis;localization;establishment of localization;cellular process	extracellular region;cell;organelle;cell part;extracellular region part	binding	Posttranslational modification, protein turnover, chaperones ;	Antigen processing and presentation	GO:0034622,cellular macromolecular complex assembly;GO:0051789,response to protein stimulus;GO:0051131,chaperone-mediated protein complex assembly;GO:0017038,protein import;GO:0051179,localization;GO:0007005,mitochondrion organization;GO:0006626,protein targeting to mitochondrion;GO:0033036,macromolecule localization;GO:0016044,membrane organization;GO:0044085,cellular component biogenesis;GO:000…	GO:0043230,extracellular organelle;GO:0005623,cell;GO:0044444,cytoplasmic part;GO:0005622,intracellular;GO:0044421,extracellular region part;GO:0031982,vesicle;GO:0005829,cytosol;GO:0031988,membrane-bounded vesicle;GO:0065010,extracellular membrane-bounded organelle;GO:0043227,membrane-bounded organelle;GO:0044464,cell part;GO:0005576,extracellular region;GO:0070062,extracellular vesicular exosom…	GO:0017076,purine nucleotide binding;GO:0005524,ATP binding;GO:0032553,ribonucleotide binding;GO:0032555,purine ribonucleotide binding;GO:0032559,adenyl ribonucleotide binding;GO:0001882,nucleoside binding;GO:0001883,purine nucleoside binding;GO:0000166,nucleotide binding;GO:0030554,adenyl nucleotide binding;GO:0005488,binding;GO:0005515,protein binding	ko04612,Antigen processing and presentation
40	sp|Q86UP2|KTN1_HUMAN	Kinectin OS=Homo sapiens OX=9606 GN=KTN1 PE=1 SV=1		down	1	0.694617	0.000121312	regulation of biological process;biological regulation;response to stimulus;signaling;cellular process	cell;organelle;organelle part;cell part	binding		Protein processing in endoplasmic reticulum	GO:0050794,regulation of cellular process;GO:0009987,cellular process;GO:0065007,biological regulation;GO:0007242,intracellular signaling cascade;GO:0007017,microtubule-based process;GO:0007264,small GTPase mediated signal transduction;GO:0007018,microtubule-based movement;GO:0050789,regulation of biological process;GO:0007165,signal transduction;GO:0007154,cell communication	GO:0044444,cytoplasmic part;GO:0005622,intracellular;GO:0016020,membrane;GO:0005783,endoplasmic reticulum;GO:0044432,endoplasmic reticulum part;GO:0044422,organelle part;GO:0005887,integral to plasma membrane;GO:0031090,organelle membrane;GO:0005886,plasma membrane;GO:0005623,cell;GO:0012505,endomembrane system;GO:0044459,plasma membrane part;GO:0044446,intracellular organelle part;GO:0044464,cel…	GO:0005515,protein binding;GO:0005488,binding;GO:0008092,cytoskeletal protein binding;GO:0019894,kinesin binding	ko04141,Protein processing in endoplasmic reticulum
41	sp|P55072|TERA_HUMAN	Transitional endoplasmic reticulum ATPase OS=Homo sapiens OX=9606 GN=VCP PE=1 SV=4		down	1	0.800381	0.00207458	establishment of localization;positive regulation of biological process;death;metabolic process;response to stimulus;viral reproduction;biological regulation;reproduction;regulation of biological process;cellular component organization or biogenesis;cellular process;signaling;reproductive process;localization	extracellular region;cell;macromolecular complex;extracellular region part;cell part;organelle;organelle part;membrane-enclosed lumen	binding;catalytic activity;enzyme regulator activity	Posttranslational modification, protein turnover, chaperones ;	Protein processing in endoplasmic reticulum	GO:0043283,biopolymer metabolic process;GO:0006302,double-strand break repair;GO:0070727,cellular macromolecule localization;GO:0031334,positive regulation of protein complex assembly;GO:0044249,cellular biosynthetic process;GO:0008219,cell death;GO:0031329,regulation of cellular catabolic process;GO:0009408,response to heat;GO:0043085,positive regulation of catalytic activity;GO:0051336,regulati…	GO:0005623,cell;GO:0043233,organelle lumen;GO:0005886,plasma membrane;GO:0043230,extracellular organelle;GO:0012505,endomembrane system;GO:0044428,nuclear part;GO:0044444,cytoplasmic part;GO:0031982,vesicle;GO:0031090,organelle membrane;GO:0005789,endoplasmic reticulum membrane;GO:0065010,extracellular membrane-bounded organelle;GO:0043231,intracellular membrane-bounded organelle;GO:0043209,myeli…	GO:0019899,enzyme binding;GO:0000166,nucleotide binding;GO:0001883,purine nucleoside binding;GO:0031625,ubiquitin protein ligase binding;GO:0019904,protein domain specific binding;GO:0042287,MHC protein binding;GO:0032559,adenyl ribonucleotide binding;GO:0032553,ribonucleotide binding;GO:0042802,identical protein binding;GO:0017111,nucleoside-triphosphatase activity;GO:0005524,ATP binding;GO:0016…	ko04141,Protein processing in endoplasmic reticulum
43	sp|P46013|KI67_HUMAN	Proliferation marker protein Ki-67 OS=Homo sapiens OX=9606 GN=MKI67 PE=1 SV=2		up	1	1.77117	2.85836e-09	developmental process;metabolic process;cellular process;multicellular organismal process;response to stimulus;cell proliferation	cell;organelle;membrane-enclosed lumen;cell part;organelle part	binding			GO:0009408,response to heat;GO:0009266,response to temperature stimulus;GO:0032502,developmental process;GO:0006950,response to stress;GO:0005975,carbohydrate metabolic process;GO:0007126,meiosis;GO:0006139,nucleobase, nucleoside, nucleotide and nucleic acid metabolic process;GO:0051321,meiotic cell cycle;GO:0007049,cell cycle;GO:0050896,response to stimulus;GO:0006022,aminoglycan metabolic proce…	GO:0000775,chromosome, centromeric region;GO:0043231,intracellular membrane-bounded organelle;GO:0043227,membrane-bounded organelle;GO:0044427,chromosomal part;GO:0005730,nucleolus;GO:0070013,intracellular organelle lumen;GO:0044446,intracellular organelle part;GO:0043232,intracellular non-membrane-bounded organelle;GO:0044464,cell part;GO:0005634,nucleus;GO:0000793,condensed chromosome;GO:004322…	GO:0001883,purine nucleoside binding;GO:0000166,nucleotide binding;GO:0030554,adenyl nucleotide binding;GO:0005488,binding;GO:0005515,protein binding;GO:0032559,adenyl ribonucleotide binding;GO:0001882,nucleoside binding;GO:0005524,ATP binding;GO:0032555,purine ribonucleotide binding;GO:0032553,ribonucleotide binding;GO:0008022,protein C-terminus binding;GO:0017076,purine nucleotide binding
45	sp|P26038|MOES_HUMAN	Moesin OS=Homo sapiens OX=9606 GN=MSN PE=1 SV=3		down	1	0.814083	0.0111954	cellular process;locomotion;multicellular organismal process;localization;positive regulation of biological process;establishment of localization;metabolic process;developmental process;biological adhesion;response to stimulus;biological regulation;immune system process;regulation of biological process;cellular component organization or biogenesis	extracellular region part;cell part;organelle;cell;extracellular region	structural molecule activity;binding		Leukocyte transendothelial migration;Regulation of actin cytoskeleton	GO:0022603,regulation of anatomical structure morphogenesis;GO:0032501,multicellular organismal process;GO:0048731,system development;GO:0065007,biological regulation;GO:0030010,establishment of cell polarity;GO:0022406,membrane docking;GO:0022610,biological adhesion;GO:0009987,cellular process;GO:0022614,membrane to membrane docking;GO:0007155,cell adhesion;GO:0032989,cellular component morphoge…	GO:0031528,microvillus membrane;GO:0045177,apical part of cell;GO:0031254,trailing edge;GO:0001931,uropod;GO:0005622,intracellular;GO:0016020,membrane;GO:0044421,extracellular region part;GO:0005924,cell-substrate adherens junction;GO:0031988,membrane-bounded vesicle;GO:0043227,membrane-bounded organelle;GO:0048471,perinuclear region of cytoplasm;GO:0070161,anchoring junction;GO:0005925,focal adh…	GO:0008092,cytoskeletal protein binding;GO:0005200,structural constituent of cytoskeleton;GO:0003779,actin binding;GO:0019900,kinase binding;GO:0003725,double-stranded RNA binding;GO:0050839,cell adhesion molecule binding;GO:0005102,receptor binding;GO:0005515,protein binding;GO:0019899,enzyme binding;GO:0005488,binding;GO:0003723,RNA binding;GO:0019901,protein kinase binding;GO:0003676,nucleic a…	ko04670,Leukocyte transendothelial migration;ko04810,Regulation of actin cytoskeleton
48	sp|Q14152|EIF3A_HUMAN	Eukaryotic translation initiation factor 3 subunit A OS=Homo sapiens OX=9606 GN=EIF3A PE=1 SV=1		up	1	1.56809	0.00396956	regulation of biological process;cellular component organization or biogenesis;biological regulation;cellular process;metabolic process	membrane-enclosed lumen;organelle;organelle part;cell part;cell;macromolecular complex	structural molecule activity;binding		RNA transport	GO:0044249,cellular biosynthetic process;GO:0010608,posttranscriptional regulation of gene expression;GO:0019222,regulation of metabolic process;GO:0044237,cellular metabolic process;GO:0009058,biosynthetic process;GO:0009889,regulation of biosynthetic process;GO:0016043,cellular component organization;GO:0043283,biopolymer metabolic process;GO:0006446,regulation of translational initiation;GO:00…	GO:0005634,nucleus;GO:0043226,organelle;GO:0043228,non-membrane-bounded organelle;GO:0044424,intracellular part;GO:0043229,intracellular organelle;GO:0005737,cytoplasm;GO:0016282,eukaryotic 43S preinitiation complex;GO:0070013,intracellular organelle lumen;GO:0044446,intracellular organelle part;GO:0043232,intracellular non-membrane-bounded organelle;GO:0044464,cell part;GO:0005730,nucleolus;GO:0…	GO:0008135,translation factor activity, nucleic acid binding;GO:0003676,nucleic acid binding;GO:0005198,structural molecule activity;GO:0045182,translation regulator activity;GO:0003743,translation initiation factor activity;GO:0005515,protein binding;GO:0005488,binding	ko03013,RNA transport
49	sp|P15144|AMPN_HUMAN	Aminopeptidase N OS=Homo sapiens OX=9606 GN=ANPEP PE=1 SV=4		down	1	0.389161	1.67361e-08	cellular process;localization;negative regulation of biological process;multicellular organismal process;reproductive process;locomotion;multi-organism process;metabolic process;developmental process;establishment of localization;regulation of biological process;reproduction;biological regulation;viral reproduction	organelle;membrane-enclosed lumen;cell part;organelle part;extracellular region part;cell;extracellular region	binding;catalytic activity;molecular transducer activity	Amino acid transport and metabolism ;	Glutathione metabolism;Renin-angiotensin system;Hematopoietic cell lineage;Metabolic pathways	GO:0019059,initiation of viral infection;GO:0043171,peptide catabolic process;GO:0034960,cellular biopolymer metabolic process;GO:0044238,primary metabolic process;GO:0009653,anatomical structure morphogenesis;GO:0065008,regulation of biological quality;GO:0008152,metabolic process;GO:0050789,regulation of biological process;GO:0030260,entry into host cell;GO:0016485,protein processing;GO:0022414…	GO:0016021,integral to membrane;GO:0005793,ER-Golgi intermediate compartment;GO:0031226,intrinsic to plasma membrane;GO:0043231,intracellular membrane-bounded organelle;GO:0065010,extracellular membrane-bounded organelle;GO:0005576,extracellular region;GO:0009897,external side of plasma membrane;GO:0044459,plasma membrane part;GO:0043229,intracellular organelle;GO:0031224,intrinsic to membrane;GO…	GO:0003824,catalytic activity;GO:0060089,molecular transducer activity;GO:0016787,hydrolase activity;GO:0001618,viral receptor activity;GO:0008235,metalloexopeptidase activity;GO:0008237,metallopeptidase activity;GO:0043167,ion binding;GO:0004871,signal transducer activity;GO:0008238,exopeptidase activity;GO:0008233,peptidase activity;GO:0046872,metal ion binding;GO:0005488,binding;GO:0070011,pep…	ko00480,Glutathione metabolism;ko01100,Metabolic pathways;ko04614,Renin-angiotensin system;ko04640,Hematopoietic cell lineage
51	sp|P04406|G3P_HUMAN	Glyceraldehyde-3-phosphate dehydrogenase OS=Homo sapiens OX=9606 GN=GAPDH PE=1 SV=3		down	1	0.78166	0.000785893	negative regulation of biological process;cellular process;regulation of biological process;cellular component organization or biogenesis;biological regulation;immune system process;response to stimulus;metabolic process;death	cell part;organelle part;extracellular region part;organelle;macromolecular complex;cell;extracellular region	binding;catalytic activity	Carbohydrate transport and metabolism ;	Microbial metabolism in diverse environments;Alzheimer's disease;Metabolic pathways;Glycolysis / Gluconeogenesis	GO:0019752,carboxylic acid metabolic process;GO:0007010,cytoskeleton organization;GO:0032269,negative regulation of cellular protein metabolic process;GO:0016265,death;GO:0019318,hexose metabolic process;GO:0010468,regulation of gene expression;GO:0009892,negative regulation of metabolic process;GO:0043436,oxoacid metabolic process;GO:0010605,negative regulation of macromolecule metabolic process…	GO:0031988,membrane-bounded vesicle;GO:0031967,organelle envelope;GO:0043227,membrane-bounded organelle;GO:0005635,nuclear envelope;GO:0048471,perinuclear region of cytoplasm;GO:0032991,macromolecular complex;GO:0031965,nuclear membrane;GO:0005829,cytosol;GO:0005811,lipid particle;GO:0043226,organelle;GO:0044424,intracellular part;GO:0005737,cytoplasm;GO:0044446,intracellular organelle part;GO:00…	GO:0016491,oxidoreductase activity;GO:0051287,NAD or NADH binding;GO:0000166,nucleotide binding;GO:0005488,binding;GO:0005515,protein binding;GO:0050661,NADP or NADPH binding;GO:0003824,catalytic activity;GO:0016620,oxidoreductase activity, acting on the aldehyde or oxo group of donors, NAD or NADP as acceptor;GO:0048037,cofactor binding;GO:0008017,microtubule binding;GO:0015631,tubulin binding;G…	ko00010,Glycolysis / Gluconeogenesis;ko05010,Alzheimer's disease;ko01100,Metabolic pathways;ko01120,Microbial metabolism in diverse environments
52	sp|P19338|NUCL_HUMAN	Nucleolin OS=Homo sapiens OX=9606 GN=NCL PE=1 SV=3		up	1	2.10635	0.000260097	establishment of localization;positive regulation of biological process;response to stimulus;cellular process;metabolic process;death;developmental process;biological regulation;reproduction;regulation of biological process;cellular component organization or biogenesis;multicellular organismal process;negative regulation of biological process;multi-organism process;reproductive process;localizati…	membrane-enclosed lumen;organelle;extracellular region part;organelle part;cell part;cell;extracellular region	binding	General function prediction only ;	Pathogenic Escherichia coli infection	GO:0010941,regulation of cell death;GO:0019953,sexual reproduction;GO:0048514,blood vessel morphogenesis;GO:0016192,vesicle-mediated transport;GO:0001817,regulation of cytokine production;GO:0051234,establishment of localization;GO:0006897,endocytosis;GO:0006355,regulation of transcription, DNA-dependent;GO:0010557,positive regulation of macromolecule biosynthetic process;GO:0048523,negative regu…	GO:0005938,cell cortex;GO:0031988,membrane-bounded vesicle;GO:0043227,membrane-bounded organelle;GO:0005730,nucleolus;GO:0001651,dense fibrillar component;GO:0005654,nucleoplasm;GO:0043226,organelle;GO:0044424,intracellular part;GO:0005737,cytoplasm;GO:0070013,intracellular organelle lumen;GO:0044446,intracellular organelle part;GO:0044464,cell part;GO:0044422,organelle part;GO:0031981,nuclear lu…	GO:0003677,DNA binding;GO:0043565,sequence-specific DNA binding;GO:0043236,laminin binding;GO:0043169,cation binding;GO:0000166,nucleotide binding;GO:0003723,RNA binding;GO:0003697,single-stranded DNA binding;GO:0042802,identical protein binding;GO:0019843,rRNA binding;GO:0042162,telomeric DNA binding;GO:0043566,structure-specific DNA binding;GO:0005515,protein binding;GO:0005488,binding;GO:00468…	ko05130,Pathogenic Escherichia coli infection
53	sp|P10809|CH60_HUMAN	60 kDa heat shock protein, mitochondrial OS=Homo sapiens OX=9606 GN=HSPD1 PE=1 SV=2		up	1	1.55576	0.00133895	response to stimulus;immune system process;positive regulation of biological process;cell proliferation;cellular process;cellular component organization or biogenesis;regulation of biological process;viral reproduction;biological regulation;death;developmental process;metabolic process;signaling;multi-organism process;negative regulation of biological process;multicellular organismal process	extracellular region;cell;macromolecular complex;organelle;extracellular region part;cell part;membrane-enclosed lumen;organelle part	binding;catalytic activity	Posttranslational modification, protein turnover, chaperones ;	Type I diabetes mellitus;RNA degradation	GO:0050790,regulation of catalytic activity;GO:0006310,DNA recombination;GO:0002237,response to molecule of bacterial origin;GO:0050794,regulation of cellular process;GO:0034621,cellular macromolecular complex subunit organization;GO:0042026,protein refolding;GO:0050863,regulation of T cell activation;GO:0032943,mononuclear cell proliferation;GO:0048731,system development;GO:0002684,positive regu…	GO:0031090,organelle membrane;GO:0030141,secretory granule;GO:0031982,vesicle;GO:0005794,Golgi apparatus;GO:0044428,nuclear part;GO:0031980,mitochondrial lumen;GO:0044444,cytoplasmic part;GO:0043235,receptor complex;GO:0005759,mitochondrial matrix;GO:0009986,cell surface;GO:0012505,endomembrane system;GO:0005623,cell;GO:0043233,organelle lumen;GO:0005886,plasma membrane;GO:0043230,extracellular o…	GO:0001882,nucleoside binding;GO:0005515,protein binding;GO:0030554,adenyl nucleotide binding;GO:0051082,unfolded protein binding;GO:0051087,chaperone binding;GO:0046982,protein heterodimerization activity;GO:0043565,sequence-specific DNA binding;GO:0019899,enzyme binding;GO:0003677,DNA binding;GO:0000166,nucleotide binding;GO:0002039,p53 binding;GO:0046983,protein dimerization activity;GO:001707…	ko04940,Type I diabetes mellitus;ko03018,RNA degradation
55	sp|P11388|TOP2A_HUMAN	DNA topoisomerase 2-alpha OS=Homo sapiens OX=9606 GN=TOP2A PE=1 SV=3		up	1	1.5811	0.00281393	positive regulation of biological process;death;developmental process;metabolic process;reproduction;regulation of biological process;cellular component organization or biogenesis;rhythmic process;response to stimulus;viral reproduction;biological regulation;immune system process;cellular process;reproductive process;multicellular organismal process	macromolecular complex;cell;cell part;organelle part;organelle;membrane-enclosed lumen	catalytic activity;binding	Replication, recombination and repair ;		GO:0009891,positive regulation of biosynthetic process;GO:0012501,programmed cell death;GO:0016043,cellular component organization;GO:0030154,cell differentiation;GO:0051254,positive regulation of RNA metabolic process;GO:0048869,cellular developmental process;GO:0002244,hemopoietic progenitor cell differentiation;GO:0045893,positive regulation of transcription, DNA-dependent;GO:0031325,positive …	GO:0044428,nuclear part;GO:0044444,cytoplasmic part;GO:0005814,centriole;GO:0005694,chromosome;GO:0005623,cell;GO:0043233,organelle lumen;GO:0043232,intracellular non-membrane-bounded organelle;GO:0043229,intracellular organelle;GO:0000793,condensed chromosome;GO:0043228,non-membrane-bounded organelle;GO:0005634,nucleus;GO:0005856,cytoskeleton;GO:0044450,microtubule organizing center part;GO:0043…	GO:0032553,ribonucleotide binding;GO:0042826,histone deacetylase binding;GO:0005524,ATP binding;GO:0000287,magnesium ion binding;GO:0001883,purine nucleoside binding;GO:0032559,adenyl ribonucleotide binding;GO:0032555,purine ribonucleotide binding;GO:0003824,catalytic activity;GO:0008022,protein C-terminus binding;GO:0005488,binding;GO:0046872,metal ion binding;GO:0003676,nucleic acid binding;GO:…
57	sp|Q9P2E9|RRBP1_HUMAN	Ribosome-binding protein 1 OS=Homo sapiens OX=9606 GN=RRBP1 PE=1 SV=5		down	1	0.754648	0.000714319	biological regulation;response to stimulus;regulation of biological process;metabolic process;developmental process;establishment of localization;multicellular organismal process;signaling;localization;cellular process	macromolecular complex;cell;organelle;organelle part;cell part	molecular transducer activity	Cell motility ;Function unknown ;	Protein processing in endoplasmic reticulum	GO:0050794,regulation of cellular process;GO:0019538,protein metabolic process;GO:0009987,cellular process;GO:0032501,multicellular organismal process;GO:0048731,system development;GO:0065007,biological regulation;GO:0043170,macromolecule metabolic process;GO:0044267,cellular protein metabolic process;GO:0007275,multicellular organismal development;GO:0008152,metabolic process;GO:0050789,regulati…	GO:0042175,nuclear envelope-endoplasmic reticulum network;GO:0016021,integral to membrane;GO:0005789,endoplasmic reticulum membrane;GO:0032991,macromolecular complex;GO:0043227,membrane-bounded organelle;GO:0043231,intracellular membrane-bounded organelle;GO:0005840,ribosome;GO:0030176,integral to endoplasmic reticulum membrane;GO:0043232,intracellular non-membrane-bounded organelle;GO:0044464,ce…	GO:0004872,receptor activity;GO:0004871,signal transducer activity;GO:0060089,molecular transducer activity	ko04141,Protein processing in endoplasmic reticulum
60	sp|Q14008|CKAP5_HUMAN	Cytoskeleton-associated protein 5 OS=Homo sapiens OX=9606 GN=CKAP5 PE=1 SV=3		up	1	1.22892	0.0394877	cellular process;localization;signaling;establishment of localization;cellular component organization or biogenesis;regulation of biological process;biological regulation;response to stimulus	organelle;cell part;organelle part;cell;macromolecular complex	binding			GO:0007242,intracellular signaling cascade;GO:0007017,microtubule-based process;GO:0016043,cellular component organization;GO:0007067,mitosis;GO:0051301,cell division;GO:0007165,signal transduction;GO:0007264,small GTPase mediated signal transduction;GO:0051329,interphase of mitotic cell cycle;GO:0051325,interphase;GO:0015931,nucleobase, nucleoside, nucleotide and nucleic acid transport;GO:000027…	GO:0000922,spindle pole;GO:0005623,cell;GO:0015630,microtubule cytoskeleton;GO:0005815,microtubule organizing center;GO:0043234,protein complex;GO:0044422,organelle part;GO:0044444,cytoplasmic part;GO:0005622,intracellular;GO:0016020,membrane;GO:0044430,cytoskeletal part;GO:0044450,microtubule organizing center part;GO:0032991,macromolecular complex;GO:0005819,spindle;GO:0005813,centrosome;GO:000…	GO:0005488,binding;GO:0005515,protein binding
61	sp|P38646|GRP75_HUMAN	Stress-70 protein, mitochondrial OS=Homo sapiens OX=9606 GN=HSPA9 PE=1 SV=2		up	1	1.27505	0.0234684	response to stimulus;biological regulation;regulation of biological process;cellular component organization or biogenesis;establishment of localization;death;metabolic process;negative regulation of biological process;localization;cellular process	cell;extracellular region;cell part;organelle part;extracellular region part;membrane-enclosed lumen;organelle	binding	Posttranslational modification, protein turnover, chaperones ;	RNA degradation	GO:0017038,protein import;GO:0034960,cellular biopolymer metabolic process;GO:0044238,primary metabolic process;GO:0007005,mitochondrion organization;GO:0051179,localization;GO:0008104,protein localization;GO:0006996,organelle organization;GO:0033365,protein localization in organelle;GO:0051649,establishment of localization in cell;GO:0046907,intracellular transport;GO:0045184,establishment of pr…	GO:0016323,basolateral plasma membrane;GO:0005759,mitochondrial matrix;GO:0005886,plasma membrane;GO:0005623,cell;GO:0043233,organelle lumen;GO:0043230,extracellular organelle;GO:0031982,vesicle;GO:0030054,cell junction;GO:0044444,cytoplasmic part;GO:0031980,mitochondrial lumen;GO:0044428,nuclear part;GO:0065010,extracellular membrane-bounded organelle;GO:0043231,intracellular membrane-bounded or…	GO:0032553,ribonucleotide binding;GO:0005524,ATP binding;GO:0017076,purine nucleotide binding;GO:0019899,enzyme binding;GO:0000166,nucleotide binding;GO:0001883,purine nucleoside binding;GO:0031625,ubiquitin protein ligase binding;GO:0031072,heat shock protein binding;GO:0032559,adenyl ribonucleotide binding;GO:0032555,purine ribonucleotide binding;GO:0019838,growth factor binding;GO:0051082,unfo…	ko03018,RNA degradation
62	sp|P50990|TCPQ_HUMAN	T-complex protein 1 subunit theta OS=Homo sapiens OX=9606 GN=CCT8 PE=1 SV=4		up	1	2.29202	2.24136e-05	cellular process;multicellular organismal process;reproductive process;metabolic process;positive regulation of biological process;regulation of biological process;cellular component organization or biogenesis;reproduction;biological regulation	cell;extracellular region;macromolecular complex;organelle;extracellular region part;cell part;membrane-enclosed lumen;organelle part	catalytic activity;binding	Posttranslational modification, protein turnover, chaperones ;		GO:0010556,regulation of macromolecule biosynthetic process;GO:0034960,cellular biopolymer metabolic process;GO:0044238,primary metabolic process;GO:0044085,cellular component biogenesis;GO:0032844,regulation of homeostatic process;GO:0033043,regulation of organelle organization;GO:0022414,reproductive process;GO:0065007,biological regulation;GO:0050794,regulation of cellular process;GO:0031323,r…	GO:0044446,intracellular organelle part;GO:0070013,intracellular organelle lumen;GO:0044464,cell part;GO:0043226,organelle;GO:0044424,intracellular part;GO:0005737,cytoplasm;GO:0032991,macromolecular complex;GO:0005813,centrosome;GO:0005829,cytosol;GO:0005654,nucleoplasm;GO:0031988,membrane-bounded vesicle;GO:0045111,intermediate filament cytoskeleton;GO:0043227,membrane-bounded organelle;GO:0044…	GO:0032553,ribonucleotide binding;GO:0005524,ATP binding;GO:0017111,nucleoside-triphosphatase activity;GO:0016818,hydrolase activity, acting on acid anhydrides, in phosphorus-containing anhydrides;GO:0016887,ATPase activity;GO:0042623,ATPase activity, coupled;GO:0017076,purine nucleotide binding;GO:0016462,pyrophosphatase activity;GO:0001883,purine nucleoside binding;GO:0000166,nucleotide binding…
63	sp|P07355|ANXA2_HUMAN	Annexin A2 OS=Homo sapiens OX=9606 GN=ANXA2 PE=1 SV=2		down	1	0.621388	1.08082e-05	metabolic process;developmental process;establishment of localization;positive regulation of biological process;cellular component organization or biogenesis;regulation of biological process;biological regulation;response to stimulus;cellular process;cell proliferation;localization;multicellular organismal process;negative regulation of biological process;signaling	extracellular region;cell;organelle;organelle part;cell part;extracellular region part	transporter activity;receptor regulator activity;binding;enzyme regulator activity			GO:0008284,positive regulation of cell proliferation;GO:0031338,regulation of vesicle fusion;GO:0006811,ion transport;GO:0030195,negative regulation of blood coagulation;GO:0044085,cellular component biogenesis;GO:0030193,regulation of blood coagulation;GO:0033043,regulation of organelle organization;GO:0051291,protein heterooligomerization;GO:0031330,negative regulation of cellular catabolic pro…	GO:0043231,intracellular membrane-bounded organelle;GO:0043209,myelin sheath;GO:0065010,extracellular membrane-bounded organelle;GO:0042995,cell projection;GO:0019897,extrinsic to plasma membrane;GO:0016023,cytoplasmic membrane-bounded vesicle;GO:0043229,intracellular organelle;GO:0005765,lysosomal membrane;GO:0070062,extracellular vesicular exosome;GO:0005578,proteinaceous extracellular matrix;G…	GO:0030234,enzyme regulator activity;GO:0005057,receptor signaling protein activity;GO:0060089,molecular transducer activity;GO:0060589,nucleoside-triphosphatase regulator activity;GO:0046872,metal ion binding;GO:0005488,binding;GO:0015267,channel activity;GO:0048306,calcium-dependent protein binding;GO:0031267,small GTPase binding;GO:0019834,phospholipase A2 inhibitor activity;GO:0022892,substra…
65	sp|P13667|PDIA4_HUMAN	Protein disulfide-isomerase A4 OS=Homo sapiens OX=9606 GN=PDIA4 PE=1 SV=2		down	1	0.657112	1.61819e-05	response to stimulus;biological regulation;localization;regulation of biological process;establishment of localization;metabolic process;cellular process	cell;membrane-enclosed lumen;organelle;cell part;organelle part	binding;catalytic activity	Posttranslational modification, protein turnover, chaperones ; Energy production and conversion ;	Protein processing in endoplasmic reticulum;Vibrio cholerae infection	GO:0046903,secretion;GO:0051716,cellular response to stimulus;GO:0045454,cell redox homeostasis;GO:0008152,metabolic process;GO:0006810,transport;GO:0050789,regulation of biological process;GO:0065008,regulation of biological quality;GO:0051641,cellular localization;GO:0033554,cellular response to stress;GO:0050794,regulation of cellular process;GO:0065007,biological regulation;GO:0009987,cellula…	GO:0005623,cell;GO:0043233,organelle lumen;GO:0048770,pigment granule;GO:0009986,cell surface;GO:0044444,cytoplasmic part;GO:0031974,membrane-enclosed lumen;GO:0005622,intracellular;GO:0005783,endoplasmic reticulum;GO:0044432,endoplasmic reticulum part;GO:0044422,organelle part;GO:0031982,vesicle;GO:0005790,smooth endoplasmic reticulum;GO:0031988,membrane-bounded vesicle;GO:0031410,cytoplasmic ve…	GO:0005488,binding;GO:0005515,protein binding;GO:0003756,protein disulfide isomerase activity;GO:0016860,intramolecular oxidoreductase activity;GO:0016862,intramolecular oxidoreductase activity, interconverting keto- and enol-groups;GO:0016864,intramolecular oxidoreductase activity, transposing S-S bonds;GO:0003824,catalytic activity;GO:0016853,isomerase activity	ko05110,Vibrio cholerae infection;ko04141,Protein processing in endoplasmic reticulum
66	sp|Q8WUM4|PDC6I_HUMAN	Programmed cell death 6-interacting protein OS=Homo sapiens OX=9606 GN=PDCD6IP PE=1 SV=1		up	1	1.31558	0.00114939	establishment of localization;death;cellular process;biological regulation;regulation of biological process;localization;cellular component organization or biogenesis	cell;extracellular region;organelle;extracellular region part;organelle part;cell part	binding		Endocytosis	GO:0051726,regulation of cell cycle;GO:0051179,localization;GO:0033036,macromolecule localization;GO:0033043,regulation of organelle organization;GO:0051640,organelle localization;GO:0006915,apoptosis;GO:0070507,regulation of microtubule cytoskeleton organization;GO:0008104,protein localization;GO:0006996,organelle organization;GO:0051649,establishment of localization in cell;GO:0045184,establish…	GO:0048770,pigment granule;GO:0015630,microtubule cytoskeleton;GO:0044422,organelle part;GO:0005815,microtubule organizing center;GO:0016020,membrane;GO:0044430,cytoskeletal part;GO:0044421,extracellular region part;GO:0005622,intracellular;GO:0043227,membrane-bounded organelle;GO:0031988,membrane-bounded vesicle;GO:0005924,cell-substrate adherens junction;GO:0031410,cytoplasmic vesicle;GO:000582…	GO:0005488,binding;GO:0005515,protein binding;GO:0005102,receptor binding;GO:0048306,calcium-dependent protein binding;GO:0042802,identical protein binding;GO:0031871,proteinase activated receptor binding;GO:0042803,protein homodimerization activity;GO:0001664,G-protein-coupled receptor binding;GO:0046983,protein dimerization activity	ko04144,Endocytosis
67	sp|P14625|ENPL_HUMAN	Endoplasmin OS=Homo sapiens OX=9606 GN=HSP90B1 PE=1 SV=1		down	1	0.757905	0.000264871	establishment of localization;positive regulation of biological process;death;metabolic process;cellular component organization or biogenesis;regulation of biological process;response to stimulus;biological regulation;immune system process;cellular process;localization;signaling;negative regulation of biological process	membrane-enclosed lumen;organelle part;organelle;cell part;extracellular region part;macromolecular complex;extracellular region;cell	binding	Posttranslational modification, protein turnover, chaperones ;	Pathways in cancer;NOD-like receptor signaling pathway;Prostate cancer;Protein processing in endoplasmic reticulum	GO:0033036,macromolecule localization;GO:0006508,proteolysis;GO:0044085,cellular component biogenesis;GO:0008104,protein localization;GO:0030036,actin cytoskeleton organization;GO:0010921,regulation of phosphatase activity;GO:0051649,establishment of localization in cell;GO:0006511,ubiquitin-dependent protein catabolic process;GO:0034962,cellular biopolymer catabolic process;GO:0048584,positive r…	GO:0044425,membrane part;GO:0005925,focal adhesion;GO:0016528,sarcoplasm;GO:0043226,organelle;GO:0044424,intracellular part;GO:0005737,cytoplasm;GO:0044446,intracellular organelle part;GO:0070013,intracellular organelle lumen;GO:0044464,cell part;GO:0042470,melanosome;GO:0031988,membrane-bounded vesicle;GO:0005924,cell-substrate adherens junction;GO:0031410,cytoplasmic vesicle;GO:0043227,membrane…	GO:0017076,purine nucleotide binding;GO:0070325,lipoprotein receptor binding;GO:0032553,ribonucleotide binding;GO:0005524,ATP binding;GO:0032559,adenyl ribonucleotide binding;GO:0003723,RNA binding;GO:0019899,enzyme binding;GO:0001883,purine nucleoside binding;GO:0000166,nucleotide binding;GO:0043169,cation binding;GO:0050750,low-density lipoprotein receptor binding;GO:0032555,purine ribonucleoti…	ko05215,Prostate cancer;ko05200,Pathways in cancer;ko04621,NOD-like receptor signaling pathway;ko04141,Protein processing in endoplasmic reticulum
68	sp|Q04637|IF4G1_HUMAN	Eukaryotic translation initiation factor 4 gamma 1 OS=Homo sapiens OX=9606 GN=EIF4G1 PE=1 SV=4		up	1	1.48491	0.00350055	metabolic process;cellular process;signaling;response to stimulus;biological regulation;regulation of biological process	cell part;cell;macromolecular complex	binding		Viral myocarditis;RNA transport	GO:0034962,cellular biopolymer catabolic process;GO:0060255,regulation of macromolecule metabolic process;GO:0051252,regulation of RNA metabolic process;GO:0010556,regulation of macromolecule biosynthetic process;GO:0006417,regulation of translation;GO:0032868,response to insulin stimulus;GO:0044238,primary metabolic process;GO:0034960,cellular biopolymer metabolic process;GO:0007167,enzyme linke…	GO:0005829,cytosol;GO:0032991,macromolecular complex;GO:0005623,cell;GO:0044464,cell part;GO:0016020,membrane;GO:0044444,cytoplasmic part;GO:0005622,intracellular;GO:0005737,cytoplasm;GO:0043234,protein complex;GO:0044424,intracellular part;GO:0016281,eukaryotic translation initiation factor 4F complex	GO:0008190,eukaryotic initiation factor 4E binding;GO:0045182,translation regulator activity;GO:0031369,translation initiation factor binding;GO:0008135,translation factor activity, nucleic acid binding;GO:0003743,translation initiation factor activity;GO:0003676,nucleic acid binding;GO:0005515,protein binding;GO:0005488,binding	ko03013,RNA transport;ko05416,Viral myocarditis
70	sp|P31948|STIP1_HUMAN	Stress-induced-phosphoprotein 1 OS=Homo sapiens OX=9606 GN=STIP1 PE=1 SV=1		up	1	1.53491	0.000288728	response to stimulus	macromolecular complex;cell;organelle;cell part	binding	General function prediction only ;	Prion diseases	GO:0050896,response to stimulus;GO:0006950,response to stress	GO:0005886,plasma membrane;GO:0005623,cell;GO:0044444,cytoplasmic part;GO:0005622,intracellular;GO:0005794,Golgi apparatus;GO:0016020,membrane;GO:0043234,protein complex;GO:0032991,macromolecular complex;GO:0043227,membrane-bounded organelle;GO:0043231,intracellular membrane-bounded organelle;GO:0043209,myelin sheath;GO:0044459,plasma membrane part;GO:0044464,cell part;GO:0044425,membrane part;GO…	GO:0051087,chaperone binding;GO:0030544,Hsp70 protein binding;GO:0005488,binding;GO:0005515,protein binding;GO:0008022,protein C-terminus binding;GO:0031072,heat shock protein binding	ko05020,Prion diseases
71	sp|P49792|RBP2_HUMAN	E3 SUMO-protein ligase RanBP2 OS=Homo sapiens OX=9606 GN=RANBP2 PE=1 SV=2		up	1	1.42058	0.00866554	cellular process;localization;negative regulation of biological process;signaling;reproductive process;multi-organism process;metabolic process;establishment of localization;reproduction;cellular component organization or biogenesis;regulation of biological process;biological regulation;viral reproduction;response to stimulus	organelle part;cell part;organelle;cell	catalytic activity;binding	Posttranslational modification, protein turnover, chaperones ;Intracellular trafficking, secretion, and vesicular transport ;	RNA transport	GO:0032446,protein modification by small protein conjugation;GO:0034960,cellular biopolymer metabolic process;GO:0033036,macromolecule localization;GO:0051322,anaphase;GO:0034961,cellular biopolymer biosynthetic process;GO:0006807,nitrogen compound metabolic process;GO:0070647,protein modification by small protein conjugation or removal;GO:0019054,modulation by virus of host cellular process;GO:0…	GO:0012505,endomembrane system;GO:0005739,mitochondrion;GO:0005623,cell;GO:0031090,organelle membrane;GO:0044422,organelle part;GO:0016234,inclusion body;GO:0016020,membrane;GO:0005622,intracellular;GO:0044428,nuclear part;GO:0044444,cytoplasmic part;GO:0005635,nuclear envelope;GO:0043227,membrane-bounded organelle;GO:0043231,intracellular membrane-bounded organelle;GO:0031967,organelle envelope;…	GO:0003755,peptidyl-prolyl cis-trans isomerase activity;GO:0003824,catalytic activity;GO:0016853,isomerase activity;GO:0046872,metal ion binding;GO:0051020,GTPase binding;GO:0005488,binding;GO:0005515,protein binding;GO:0043167,ion binding;GO:0031267,small GTPase binding;GO:0016859,cis-trans isomerase activity;GO:0003676,nucleic acid binding;GO:0016874,ligase activity;GO:0008536,Ran GTPase bindin…	ko03013,RNA transport
72	sp|Q9NR30|DDX21_HUMAN	Nucleolar RNA helicase 2 OS=Homo sapiens OX=9606 GN=DDX21 PE=1 SV=5		up	1	1.69241	5.17128e-06	multicellular organismal process;multi-organism process;cellular process;biological regulation;response to stimulus;regulation of biological process;cellular component organization or biogenesis;metabolic process;developmental process;positive regulation of biological process	cell;organelle;membrane-enclosed lumen;organelle part;cell part	binding;catalytic activity	Replication, recombination and repair ; Transcription ; Translation, ribosomal structure and biogenesis ;		GO:0034961,cellular biopolymer biosynthetic process;GO:0006807,nitrogen compound metabolic process;GO:0006351,transcription, DNA-dependent;GO:0009615,response to virus;GO:0040029,regulation of gene expression, epigenetic;GO:0044085,cellular component biogenesis;GO:0060348,bone development;GO:0044238,primary metabolic process;GO:0034960,cellular biopolymer metabolic process;GO:0010604,positive reg…	GO:0070013,intracellular organelle lumen;GO:0044446,intracellular organelle part;GO:0044464,cell part;GO:0043232,intracellular non-membrane-bounded organelle;GO:0044424,intracellular part;GO:0043228,non-membrane-bounded organelle;GO:0005634,nucleus;GO:0043226,organelle;GO:0043229,intracellular organelle;GO:0005654,nucleoplasm;GO:0043231,intracellular membrane-bounded organelle;GO:0043227,membrane…	GO:0000166,nucleotide binding;GO:0008186,RNA-dependent ATPase activity;GO:0001883,purine nucleoside binding;GO:0032559,adenyl ribonucleotide binding;GO:0008026,ATP-dependent helicase activity;GO:0003723,RNA binding;GO:0032553,ribonucleotide binding;GO:0005524,ATP binding;GO:0019843,rRNA binding;GO:0017111,nucleoside-triphosphatase activity;GO:0016887,ATPase activity;GO:0016818,hydrolase activity,…
76	sp|P49368|TCPG_HUMAN	T-complex protein 1 subunit gamma OS=Homo sapiens OX=9606 GN=CCT3 PE=1 SV=4		up	1	1.81615	0.00811113	positive regulation of biological process;metabolic process;cellular component organization or biogenesis;regulation of biological process;reproduction;biological regulation;cellular process;reproductive process;multicellular organismal process	organelle;organelle part;cell part;extracellular region part;extracellular region;cell;macromolecular complex	binding	Posttranslational modification, protein turnover, chaperones ;		GO:0045935,positive regulation of nucleobase, nucleoside, nucleotide and nucleic acid metabolic process;GO:0009889,regulation of biosynthetic process;GO:0019222,regulation of metabolic process;GO:0009566,fertilization;GO:0051171,regulation of nitrogen compound metabolic process;GO:0044237,cellular metabolic process;GO:0035036,sperm-egg recognition;GO:0032212,positive regulation of telomere mainte…	GO:0043230,extracellular organelle;GO:0005623,cell;GO:0005886,plasma membrane;GO:0031982,vesicle;GO:0044444,cytoplasmic part;GO:0043209,myelin sheath;GO:0065010,extracellular membrane-bounded organelle;GO:0005856,cytoskeleton;GO:0005832,chaperonin-containing T-complex;GO:0043229,intracellular organelle;GO:0070062,extracellular vesicular exosome;GO:0043228,non-membrane-bounded organelle;GO:0043232…	GO:0017076,purine nucleotide binding;GO:0051082,unfolded protein binding;GO:0005524,ATP binding;GO:0032553,ribonucleotide binding;GO:0032555,purine ribonucleotide binding;GO:0032559,adenyl ribonucleotide binding;GO:0001882,nucleoside binding;GO:0001883,purine nucleoside binding;GO:0030554,adenyl nucleotide binding;GO:0000166,nucleotide binding;GO:0005488,binding;GO:0005515,protein binding
77	sp|P11940|PABP1_HUMAN	Polyadenylate-binding protein 1 OS=Homo sapiens OX=9606 GN=PABPC1 PE=1 SV=2		up	1	1.68316	0.0017316	cellular process;negative regulation of biological process;reproductive process;metabolic process;positive regulation of biological process;biological regulation;viral reproduction;regulation of biological process;reproduction	organelle;cell part;organelle part;extracellular region part;extracellular region;cell;macromolecular complex	translation regulator activity;binding	General function prediction only ;	RNA transport	GO:0050792,regulation of viral reproduction;GO:0045069,regulation of viral genome replication;GO:0016070,RNA metabolic process;GO:0044267,cellular protein metabolic process;GO:0043170,macromolecule metabolic process;GO:0009987,cellular process;GO:0031123,RNA 3'-end processing;GO:0009893,positive regulation of metabolic process;GO:0031326,regulation of cellular biosynthetic process;GO:0019538,prot…	GO:0044446,intracellular organelle part;GO:0044464,cell part;GO:0044425,membrane part;GO:0005925,focal adhesion;GO:0044424,intracellular part;GO:0043226,organelle;GO:0005737,cytoplasm;GO:0032991,macromolecular complex;GO:0070161,anchoring junction;GO:0005829,cytosol;GO:0005924,cell-substrate adherens junction;GO:0031988,membrane-bounded vesicle;GO:0043227,membrane-bounded organelle;GO:0005622,int…	GO:0005515,protein binding;GO:0003729,mRNA binding;GO:0005488,binding;GO:0000166,nucleotide binding;GO:0008187,poly-pyrimidine tract binding;GO:0008143,poly(A) RNA binding;GO:0003676,nucleic acid binding;GO:0008494,translation activator activity;GO:0003723,RNA binding;GO:0003727,single-stranded RNA binding;GO:0008266,poly(U) RNA binding;GO:0045182,translation regulator activity;GO:0070717,poly-pu…	ko03013,RNA transport
78	sp|P27816|MAP4_HUMAN	Microtubule-associated protein 4 OS=Homo sapiens OX=9606 GN=MAP4 PE=1 SV=3		down	1	0.52476	7.1511e-07	multicellular organismal process;cellular component organization or biogenesis;localization;developmental process;establishment of localization;cellular process	organelle;cell part;organelle part;extracellular region part;macromolecular complex;cell;extracellular region	structural molecule activity;binding			GO:0007049,cell cycle;GO:0007010,cytoskeleton organization;GO:0051294,establishment of spindle orientation;GO:0051234,establishment of localization;GO:0051293,establishment of spindle localization;GO:0030182,neuron differentiation;GO:0051653,spindle localization;GO:0032502,developmental process;GO:0007399,nervous system development;GO:0000278,mitotic cell cycle;GO:0048869,cellular developmental p…	GO:0043228,non-membrane-bounded organelle;GO:0070062,extracellular vesicular exosome;GO:0043229,intracellular organelle;GO:0044463,cell projection part;GO:0043232,intracellular non-membrane-bounded organelle;GO:0005576,extracellular region;GO:0042995,cell projection;GO:0065010,extracellular membrane-bounded organelle;GO:0043231,intracellular membrane-bounded organelle;GO:0005856,cytoskeleton;GO:0…	GO:0005488,binding;GO:0005515,protein binding;GO:0008092,cytoskeletal protein binding;GO:0008017,microtubule binding;GO:0005198,structural molecule activity;GO:0015631,tubulin binding
79	sp|P22314|UBA1_HUMAN	Ubiquitin-like modifier-activating enzyme 1 OS=Homo sapiens OX=9606 GN=UBA1 PE=1 SV=3		down	1	0.795231	0.00225109	response to stimulus;cellular process;metabolic process	organelle;organelle part;cell part;extracellular region part;extracellular region;cell	catalytic activity;binding	Coenzyme transport and metabolism ;	Parkinson's disease;Ubiquitin mediated proteolysis	GO:0043285,biopolymer catabolic process;GO:0019538,protein metabolic process;GO:0006974,response to DNA damage stimulus;GO:0009057,macromolecule catabolic process;GO:0043283,biopolymer metabolic process;GO:0019941,modification-dependent protein catabolic process;GO:0043170,macromolecule metabolic process;GO:0009056,catabolic process;GO:0044257,cellular protein catabolic process;GO:0009987,cellula…	GO:0044432,endoplasmic reticulum part;GO:0005773,vacuole;GO:0044422,organelle part;GO:0016020,membrane;GO:0005783,endoplasmic reticulum;GO:0044421,extracellular region part;GO:0016327,apicolateral plasma membrane;GO:0005622,intracellular;GO:0005739,mitochondrion;GO:0005768,endosome;GO:0000792,heterochromatin;GO:0043296,apical junction complex;GO:0005737,cytoplasm;GO:0044425,membrane part;GO:00444…	GO:0003824,catalytic activity;GO:0032555,purine ribonucleotide binding;GO:0016881,acid-amino acid ligase activity;GO:0001882,nucleoside binding;GO:0005488,binding;GO:0005515,protein binding;GO:0030554,adenyl nucleotide binding;GO:0017076,purine nucleotide binding;GO:0032553,ribonucleotide binding;GO:0005524,ATP binding;GO:0016874,ligase activity;GO:0004842,ubiquitin-protein ligase activity;GO:003…	ko04120,Ubiquitin mediated proteolysis;ko05012,Parkinson's disease
81	sp|P20700|LMNB1_HUMAN	Lamin-B1 OS=Homo sapiens OX=9606 GN=LMNB1 PE=1 SV=2		down	1	0.764502	0.00137918	cellular process;death;cellular component organization or biogenesis	cell part;organelle part;membrane-enclosed lumen;organelle;cell;macromolecular complex	structural molecule activity;binding			GO:0008219,cell death;GO:0012501,programmed cell death;GO:0016043,cellular component organization;GO:0009987,cellular process;GO:0006921,cell structure disassembly during apoptosis;GO:0016265,death;GO:0022411,cellular component disassembly;GO:0006915,apoptosis	GO:0034399,nuclear periphery;GO:0005882,intermediate filament;GO:0044422,organelle part;GO:0031981,nuclear lumen;GO:0005622,intracellular;GO:0031974,membrane-enclosed lumen;GO:0044430,cytoskeletal part;GO:0016020,membrane;GO:0019866,organelle inner membrane;GO:0031967,organelle envelope;GO:0016363,nuclear matrix;GO:0045111,intermediate filament cytoskeleton;GO:0005635,nuclear envelope;GO:0043227,…	GO:0005198,structural molecule activity;GO:0043274,phospholipase binding;GO:0019899,enzyme binding;GO:0005515,protein binding;GO:0005488,binding
82	sp|P05783|K1C18_HUMAN	Keratin, type I cytoskeletal 18 OS=Homo sapiens OX=9606 GN=KRT18 PE=1 SV=2		up	1	3.12187	0.00505365	signaling;negative regulation of biological process;localization;cellular process;response to stimulus;viral reproduction;biological regulation;regulation of biological process;cellular component organization or biogenesis;establishment of localization;developmental process;death	organelle part;membrane-enclosed lumen;cell part;extracellular region part;organelle;cell;extracellular region;macromolecular complex	structural molecule activity		Pathogenic Escherichia coli infection;Staphylococcus aureus infection	GO:0048519,negative regulation of biological process;GO:0016032,viral reproduction;GO:0048856,anatomical structure development;GO:0043001,Golgi to plasma membrane protein transport;GO:0015031,protein transport;GO:0006892,post-Golgi vesicle-mediated transport;GO:0033209,tumor necrosis factor-mediated signaling pathway;GO:0016043,cellular component organization;GO:0043069,negative regulation of pro…	GO:0005856,cytoskeleton;GO:0043231,intracellular membrane-bounded organelle;GO:0044450,microtubule organizing center part;GO:0065010,extracellular membrane-bounded organelle;GO:0043232,intracellular non-membrane-bounded organelle;GO:0005576,extracellular region;GO:0043229,intracellular organelle;GO:0070062,extracellular vesicular exosome;GO:0005634,nucleus;GO:0043228,non-membrane-bounded organell…	GO:0005198,structural molecule activity	ko05150,Staphylococcus aureus infection;ko05130,Pathogenic Escherichia coli infection
84	sp|P22102|PUR2_HUMAN	Trifunctional purine biosynthetic protein adenosine-3 OS=Homo sapiens OX=9606 GN=GART PE=1 SV=1		up	1	1.34623	0.000159644	developmental process;metabolic process;cellular process;response to stimulus;multicellular organismal process	cell;extracellular region;organelle;extracellular region part;cell part	binding;catalytic activity	Nucleotide transport and metabolism ;	Metabolic pathways;Purine metabolism;One carbon pool by folate	GO:0007420,brain development;GO:0046653,tetrahydrofolate metabolic process;GO:0006189,'de novo' IMP biosynthetic process;GO:0006807,nitrogen compound metabolic process;GO:0009167,purine ribonucleoside monophosphate metabolic process;GO:0009259,ribonucleotide metabolic process;GO:0046040,IMP metabolic process;GO:0044238,primary metabolic process;GO:0008152,metabolic process;GO:0046483,heterocycle …	GO:0044464,cell part;GO:0005576,extracellular region;GO:0005737,cytoplasm;GO:0031224,intrinsic to membrane;GO:0044425,membrane part;GO:0070062,extracellular vesicular exosome;GO:0043226,organelle;GO:0044424,intracellular part;GO:0005829,cytosol;GO:0016021,integral to membrane;GO:0043227,membrane-bounded organelle;GO:0031988,membrane-bounded vesicle;GO:0065010,extracellular membrane-bounded organe…	GO:0032559,adenyl ribonucleotide binding;GO:0016879,ligase activity, forming carbon-nitrogen bonds;GO:0001883,purine nucleoside binding;GO:0043169,cation binding;GO:0000166,nucleotide binding;GO:0017076,purine nucleotide binding;GO:0032553,ribonucleotide binding;GO:0005524,ATP binding;GO:0016874,ligase activity;GO:0001882,nucleoside binding;GO:0008168,methyltransferase activity;GO:0043167,ion bin…	ko00230,Purine metabolism;ko01100,Metabolic pathways;ko00670,One carbon pool by folate
85	sp|Q14697|GANAB_HUMAN	Neutral alpha-glucosidase AB OS=Homo sapiens OX=9606 GN=GANAB PE=1 SV=3		down	1	0.712183	0.0143719	metabolic process;cellular process	organelle part;membrane-enclosed lumen;cell part;extracellular region part;organelle;macromolecular complex;extracellular region;cell	binding;catalytic activity	Carbohydrate transport and metabolism ;	Metabolic pathways;Protein processing in endoplasmic reticulum;N-Glycan biosynthesis	GO:0044262,cellular carbohydrate metabolic process;GO:0009059,macromolecule biosynthetic process;GO:0018196,peptidyl-asparagine modification;GO:0043687,post-translational protein modification;GO:0043412,biopolymer modification;GO:0006457,protein folding;GO:0006487,protein amino acid N-linked glycosylation;GO:0044260,cellular macromolecule metabolic process;GO:0018279,protein amino acid N-linked g…	GO:0005794,Golgi apparatus;GO:0044444,cytoplasmic part;GO:0031982,vesicle;GO:0043230,extracellular organelle;GO:0043233,organelle lumen;GO:0005623,cell;GO:0005576,extracellular region;GO:0043229,intracellular organelle;GO:0016023,cytoplasmic membrane-bounded vesicle;GO:0005788,endoplasmic reticulum lumen;GO:0070062,extracellular vesicular exosome;GO:0043231,intracellular membrane-bounded organell…	GO:0003824,catalytic activity;GO:0030246,carbohydrate binding;GO:0016787,hydrolase activity;GO:0005488,binding	ko04141,Protein processing in endoplasmic reticulum;ko01100,Metabolic pathways;ko00510,N-Glycan biosynthesis
86	sp|Q01813|PFKAP_HUMAN	ATP-dependent 6-phosphofructokinase, platelet type OS=Homo sapiens OX=9606 GN=PFKP PE=1 SV=2		up	1	1.41487	0.0114467	cellular process;metabolic process	extracellular region;cell;organelle;cell part;extracellular region part	binding;catalytic activity	Carbohydrate transport and metabolism ;	Glycolysis / Gluconeogenesis;Metabolic pathways;Fructose and mannose metabolism;Galactose metabolism;Microbial metabolism in diverse environments;Pentose phosphate pathway	GO:0019318,hexose metabolic process;GO:0006002,fructose 6-phosphate metabolic process;GO:0006066,alcohol metabolic process;GO:0044238,primary metabolic process;GO:0005975,carbohydrate metabolic process;GO:0006000,fructose metabolic process;GO:0008152,metabolic process;GO:0005996,monosaccharide metabolic process	GO:0016020,membrane;GO:0044421,extracellular region part;GO:0044444,cytoplasmic part;GO:0005622,intracellular;GO:0031982,vesicle;GO:0005623,cell;GO:0043230,extracellular organelle;GO:0044464,cell part;GO:0005576,extracellular region;GO:0005737,cytoplasm;GO:0043229,intracellular organelle;GO:0070062,extracellular vesicular exosome;GO:0005634,nucleus;GO:0043226,organelle;GO:0044424,intracellular pa…	GO:0032403,protein complex binding;GO:0032559,adenyl ribonucleotide binding;GO:0016773,phosphotransferase activity, alcohol group as acceptor;GO:0001883,purine nucleoside binding;GO:0000166,nucleotide binding;GO:0043169,cation binding;GO:0017076,purine nucleotide binding;GO:0032553,ribonucleotide binding;GO:0005524,ATP binding;GO:0016301,kinase activity;GO:0001882,nucleoside binding;GO:0043167,io…	ko01120,Microbial metabolism in diverse environments;ko00052,Galactose metabolism;ko00030,Pentose phosphate pathway;ko01100,Metabolic pathways;ko00051,Fructose and mannose metabolism;ko00010,Glycolysis / Gluconeogenesis
90	sp|P48643|TCPE_HUMAN	T-complex protein 1 subunit epsilon OS=Homo sapiens OX=9606 GN=CCT5 PE=1 SV=1		up	1	1.72057	0.0010163	multicellular organismal process;multi-organism process;reproductive process;cellular process;cellular component organization or biogenesis;reproduction;regulation of biological process;biological regulation;response to stimulus;metabolic process;positive regulation of biological process	extracellular region;cell;macromolecular complex;organelle;cell part;extracellular region part;membrane-enclosed lumen;organelle part	binding	Posttranslational modification, protein turnover, chaperones ;		GO:0009615,response to virus;GO:0032844,regulation of homeostatic process;GO:0033043,regulation of organelle organization;GO:0034960,cellular biopolymer metabolic process;GO:0044238,primary metabolic process;GO:0010556,regulation of macromolecule biosynthetic process;GO:0007338,single fertilization;GO:0009607,response to biotic stimulus;GO:0065008,regulation of biological quality;GO:0006275,regul…	GO:0043229,intracellular organelle;GO:0005634,nucleus;GO:0043228,non-membrane-bounded organelle;GO:0070062,extracellular vesicular exosome;GO:0005576,extracellular region;GO:0043232,intracellular non-membrane-bounded organelle;GO:0044459,plasma membrane part;GO:0043231,intracellular membrane-bounded organelle;GO:0043209,myelin sheath;GO:0065010,extracellular membrane-bounded organelle;GO:0005856,…	GO:0030554,adenyl nucleotide binding;GO:0000166,nucleotide binding;GO:0001883,purine nucleoside binding;GO:0005488,binding;GO:0005515,protein binding;GO:0032559,adenyl ribonucleotide binding;GO:0001882,nucleoside binding;GO:0005524,ATP binding;GO:0051082,unfolded protein binding;GO:0032555,purine ribonucleotide binding;GO:0032553,ribonucleotide binding;GO:0008092,cytoskeletal protein binding;GO:0…
91	sp|P78371|TCPB_HUMAN	T-complex protein 1 subunit beta OS=Homo sapiens OX=9606 GN=CCT2 PE=1 SV=4		up	1	2.23168	7.89345e-05	cellular component organization or biogenesis;reproduction;regulation of biological process;biological regulation;metabolic process;positive regulation of biological process;multicellular organismal process;reproductive process;cellular process	organelle part;cell part;extracellular region part;organelle;macromolecular complex;cell;extracellular region	binding	Posttranslational modification, protein turnover, chaperones ;		GO:0045740,positive regulation of DNA replication;GO:0010557,positive regulation of macromolecule biosynthetic process;GO:0010638,positive regulation of organelle organization;GO:0033044,regulation of chromosome organization;GO:0051972,regulation of telomerase activity;GO:0019953,sexual reproduction;GO:0022607,cellular component assembly;GO:0043085,positive regulation of catalytic activity;GO:005…	GO:0043232,intracellular non-membrane-bounded organelle;GO:0005576,extracellular region;GO:0044459,plasma membrane part;GO:0043229,intracellular organelle;GO:0070062,extracellular vesicular exosome;GO:0043228,non-membrane-bounded organelle;GO:0005856,cytoskeleton;GO:0005832,chaperonin-containing T-complex;GO:0043209,myelin sheath;GO:0065010,extracellular membrane-bounded organelle;GO:0044444,cyto…	GO:0051082,unfolded protein binding;GO:0005524,ATP binding;GO:0032553,ribonucleotide binding;GO:0032555,purine ribonucleotide binding;GO:0017076,purine nucleotide binding;GO:0001883,purine nucleoside binding;GO:0030554,adenyl nucleotide binding;GO:0000166,nucleotide binding;GO:0019899,enzyme binding;GO:0005515,protein binding;GO:0005488,binding;GO:0032559,adenyl ribonucleotide binding;GO:0001882,…
100	sp|P30101|PDIA3_HUMAN	Protein disulfide-isomerase A3 OS=Homo sapiens OX=9606 GN=PDIA3 PE=1 SV=4		down	1	0.720924	0.000469532	immune system process;biological regulation;response to stimulus;regulation of biological process;metabolic process;establishment of localization;localization;cellular process	membrane-enclosed lumen;organelle;cell part;organelle part;extracellular region part;extracellular region;cell	binding;catalytic activity	Posttranslational modification, protein turnover, chaperones ; Energy production and conversion ;	Protein processing in endoplasmic reticulum;Antigen processing and presentation	GO:0009057,macromolecule catabolic process;GO:0043283,biopolymer metabolic process;GO:0043285,biopolymer catabolic process;GO:0034645,cellular macromolecule biosynthetic process;GO:0048002,antigen processing and presentation of peptide antigen;GO:0070727,cellular macromolecule localization;GO:0044237,cellular metabolic process;GO:0045185,maintenance of protein location;GO:0051716,cellular respons…	GO:0005788,endoplasmic reticulum lumen;GO:0005912,adherens junction;GO:0005634,nucleus;GO:0070062,extracellular vesicular exosome;GO:0043229,intracellular organelle;GO:0016023,cytoplasmic membrane-bounded vesicle;GO:0044459,plasma membrane part;GO:0005576,extracellular region;GO:0065010,extracellular membrane-bounded organelle;GO:0043209,myelin sheath;GO:0043231,intracellular membrane-bounded org…	GO:0004175,endopeptidase activity;GO:0003756,protein disulfide isomerase activity;GO:0004197,cysteine-type endopeptidase activity;GO:0016298,lipase activity;GO:0016667,oxidoreductase activity, acting on sulfur group of donors;GO:0016788,hydrolase activity, acting on ester bonds;GO:0070011,peptidase activity, acting on L-amino acid peptides;GO:0005488,binding;GO:0005515,protein binding;GO:0008233,…	ko04141,Protein processing in endoplasmic reticulum;ko04612,Antigen processing and presentation
102	sp|P42224|STAT1_HUMAN	Signal transducer and activator of transcription 1-alpha/beta OS=Homo sapiens OX=9606 GN=STAT1 PE=1 SV=2		down	1	0.378651	3.19881e-07	negative regulation of biological process;multicellular organismal process;multi-organism process;signaling;reproductive process;localization;biological regulation;viral reproduction;cellular component organization or biogenesis;reproduction;regulation of biological process;developmental process;metabolic process;death;locomotion;cell proliferation;cellular process;immune system process;response …	membrane-enclosed lumen;organelle;cell part;organelle part;cell	nucleic acid binding transcription factor activity;molecular transducer activity;binding		Toll-like receptor signaling pathway;Hepatitis C;Toxoplasmosis;Jak-STAT signaling pathway;Chemokine signaling pathway;Leishmaniasis;Pathways in cancer;Pancreatic cancer	GO:0032870,cellular response to hormone stimulus;GO:0050790,regulation of catalytic activity;GO:0050794,regulation of cellular process;GO:0031323,regulation of cellular metabolic process;GO:0009607,response to biotic stimulus;GO:0048878,chemical homeostasis;GO:0050789,regulation of biological process;GO:0060338,regulation of type I interferon-mediated signaling pathway;GO:0046719,regulation of vi…	GO:0030424,axon;GO:0005654,nucleoplasm;GO:0005829,cytosol;GO:0044427,chromosomal part;GO:0005730,nucleolus;GO:0048471,perinuclear region of cytoplasm;GO:0043227,membrane-bounded organelle;GO:0044446,intracellular organelle part;GO:0070013,intracellular organelle lumen;GO:0044464,cell part;GO:0000785,chromatin;GO:0043226,organelle;GO:0044424,intracellular part;GO:0005737,cytoplasm;GO:0000790,nucle…	GO:0005164,tumor necrosis factor receptor binding;GO:0060089,molecular transducer activity;GO:0042803,protein homodimerization activity;GO:0046983,protein dimerization activity;GO:0042802,identical protein binding;GO:0004871,signal transducer activity;GO:0019899,enzyme binding;GO:0032813,tumor necrosis factor receptor superfamily binding;GO:0005488,binding;GO:0005515,protein binding;GO:0005102,re…	ko04630,Jak-STAT signaling pathway;ko04620,Toll-like receptor signaling pathway;ko05212,Pancreatic cancer;ko04062,Chemokine signaling pathway;ko05160,Hepatitis C;ko05145,Toxoplasmosis;ko05140,Leishmaniasis;ko05200,Pathways in cancer
103	sp|P11717|MPRI_HUMAN	Cation-independent mannose-6-phosphate receptor OS=Homo sapiens OX=9606 GN=IGF2R PE=1 SV=3		up	1	1.2235	0.0227496	cellular process;multicellular organismal process;signaling;reproductive process;localization;developmental process;death;positive regulation of biological process;establishment of localization;biological regulation;response to stimulus;cellular component organization or biogenesis;reproduction;regulation of biological process	cell;extracellular region;macromolecular complex;extracellular region part;cell part;organelle;organelle part;membrane-enclosed lumen	molecular transducer activity;catalytic activity;binding;transporter activity		Lysosome	GO:0051234,establishment of localization;GO:0050896,response to stimulus;GO:0048522,positive regulation of cellular process;GO:0007154,cell communication;GO:0016192,vesicle-mediated transport;GO:0019953,sexual reproduction;GO:0010941,regulation of cell death;GO:0048513,organ development;GO:0001889,liver development;GO:0006898,receptor-mediated endocytosis;GO:0031667,response to nutrient levels;GO…	GO:0048475,coated membrane;GO:0005773,vacuole;GO:0044422,organelle part;GO:0005802,trans-Golgi network;GO:0031974,membrane-enclosed lumen;GO:0005622,intracellular;GO:0005768,endosome;GO:0030139,endocytic vesicle;GO:0043226,organelle;GO:0044424,intracellular part;GO:0031975,envelope;GO:0005615,extracellular space;GO:0031970,organelle envelope lumen;GO:0031967,organelle envelope;GO:0032991,macromol…	GO:0048029,monosaccharide binding;GO:0004871,signal transducer activity;GO:0005215,transporter activity;GO:0005529,sugar binding;GO:0005515,protein binding;GO:0005488,binding;GO:0051219,phosphoprotein binding;GO:0003824,catalytic activity;GO:0016740,transferase activity;GO:0060089,molecular transducer activity;GO:0005520,insulin-like growth factor binding;GO:0016772,transferase activity, transfer…	ko04142,Lysosome
106	sp|P07237|PDIA1_HUMAN	Protein disulfide-isomerase OS=Homo sapiens OX=9606 GN=P4HB PE=1 SV=3		down	1	0.353221	6.86648e-06	cellular process;multi-organism process;reproductive process;locomotion;metabolic process;positive regulation of biological process;cellular component organization or biogenesis;reproduction;regulation of biological process;biological regulation;viral reproduction;response to stimulus	membrane-enclosed lumen;organelle part;organelle;extracellular region part;cell part;macromolecular complex;extracellular region;cell	catalytic activity;binding	Posttranslational modification, protein turnover, chaperones ; Energy production and conversion ;	Protein processing in endoplasmic reticulum	GO:0019511,peptidyl-proline hydroxylation;GO:0018193,peptidyl-amino acid modification;GO:0043903,regulation of symbiosis, encompassing mutualism through parasitism;GO:0043062,extracellular structure organization;GO:0006950,response to stress;GO:0043436,oxoacid metabolic process;GO:0018208,peptidyl-proline modification;GO:0050896,response to stimulus;GO:0030198,extracellular matrix organization;GO…	GO:0009897,external side of plasma membrane;GO:0044459,plasma membrane part;GO:0005576,extracellular region;GO:0016222,procollagen-proline 4-dioxygenase complex;GO:0005912,adherens junction;GO:0005788,endoplasmic reticulum lumen;GO:0070062,extracellular vesicular exosome;GO:0043229,intracellular organelle;GO:0016023,cytoplasmic membrane-bounded vesicle;GO:0030055,cell-substrate junction;GO:000579…	GO:0016706,oxidoreductase activity, acting on paired donors, with incorporation or reduction of molecular oxygen, 2-oxoglutarate as one donor, and incorporation of one atom each of oxygen into both donors;GO:0004175,endopeptidase activity;GO:0019899,enzyme binding;GO:0046982,protein heterodimerization activity;GO:0016705,oxidoreductase activity, acting on paired donors, with incorporation or redu…	ko04141,Protein processing in endoplasmic reticulum
108	sp|Q9Y4L1|HYOU1_HUMAN	Hypoxia up-regulated protein 1 OS=Homo sapiens OX=9606 GN=HYOU1 PE=1 SV=1		down	1	0.806811	0.00313878	cellular component organization or biogenesis;localization;establishment of localization;metabolic process;cellular process	cell;extracellular region;macromolecular complex;organelle;cell part;extracellular region part;membrane-enclosed lumen;organelle part	binding	Posttranslational modification, protein turnover, chaperones ;	Protein processing in endoplasmic reticulum	GO:0016044,membrane organization;GO:0010324,membrane invagination;GO:0051234,establishment of localization;GO:0006888,ER to Golgi vesicle-mediated transport;GO:0006898,receptor-mediated endocytosis;GO:0044260,cellular macromolecule metabolic process;GO:0046907,intracellular transport;GO:0016192,vesicle-mediated transport;GO:0051649,establishment of localization in cell;GO:0048193,Golgi vesicle tr…	GO:0030055,cell-substrate junction;GO:0065010,extracellular membrane-bounded organelle;GO:0043231,intracellular membrane-bounded organelle;GO:0044459,plasma membrane part;GO:0005576,extracellular region;GO:0070062,extracellular vesicular exosome;GO:0005912,adherens junction;GO:0005788,endoplasmic reticulum lumen;GO:0043229,intracellular organelle;GO:0043230,extracellular organelle;GO:0005623,cell…	GO:0001882,nucleoside binding;GO:0032559,adenyl ribonucleotide binding;GO:0005488,binding;GO:0005515,protein binding;GO:0001883,purine nucleoside binding;GO:0000166,nucleotide binding;GO:0030554,adenyl nucleotide binding;GO:0017076,purine nucleotide binding;GO:0032555,purine ribonucleotide binding;GO:0032553,ribonucleotide binding;GO:0005524,ATP binding;GO:0051087,chaperone binding	ko04141,Protein processing in endoplasmic reticulum
116	sp|P13010|XRCC5_HUMAN	X-ray repair cross-complementing protein 5 OS=Homo sapiens OX=9606 GN=XRCC5 PE=1 SV=3		up	1	1.26628	0.0498011	response to stimulus;immune system process;biological regulation;regulation of biological process;positive regulation of biological process;developmental process;metabolic process;multicellular organismal process;negative regulation of biological process;cell proliferation;cellular process	organelle part;cell part;organelle;membrane-enclosed lumen;macromolecular complex;cell	catalytic activity;binding		Non-homologous end-joining	GO:0050767,regulation of neurogenesis;GO:0051240,positive regulation of multicellular organismal process;GO:0006955,immune response;GO:0007275,multicellular organismal development;GO:0042127,regulation of cell proliferation;GO:0060284,regulation of cell development;GO:0031324,negative regulation of cellular metabolic process;GO:0032501,multicellular organismal process;GO:0009987,cellular process;…	GO:0005694,chromosome;GO:0044444,cytoplasmic part;GO:0044428,nuclear part;GO:0043233,organelle lumen;GO:0005886,plasma membrane;GO:0005623,cell;GO:0005634,nucleus;GO:0043228,non-membrane-bounded organelle;GO:0043229,intracellular organelle;GO:0043232,intracellular non-membrane-bounded organelle;GO:0032993,protein-DNA complex;GO:0000228,nuclear chromosome;GO:0043231,intracellular membrane-bounded …	GO:0001882,nucleoside binding;GO:0005515,protein binding;GO:0030554,adenyl nucleotide binding;GO:0042162,telomeric DNA binding;GO:0017076,purine nucleotide binding;GO:0016462,pyrophosphatase activity;GO:0008094,DNA-dependent ATPase activity;GO:0003678,DNA helicase activity;GO:0004003,ATP-dependent DNA helicase activity;GO:0019899,enzyme binding;GO:0043565,sequence-specific DNA binding;GO:0003677,…	ko03450,Non-homologous end-joining
119	sp|Q99832|TCPH_HUMAN	T-complex protein 1 subunit eta OS=Homo sapiens OX=9606 GN=CCT7 PE=1 SV=2		up	1	1.97639	0.00217998	cellular process;reproductive process;multicellular organismal process;positive regulation of biological process;metabolic process;biological regulation;regulation of biological process;cellular component organization or biogenesis;reproduction	cell;extracellular region;macromolecular complex;organelle;organelle part;extracellular region part;cell part	binding	Posttranslational modification, protein turnover, chaperones ;		GO:0034960,cellular biopolymer metabolic process;GO:0044238,primary metabolic process;GO:0010556,regulation of macromolecule biosynthetic process;GO:0032844,regulation of homeostatic process;GO:0033043,regulation of organelle organization;GO:0065007,biological regulation;GO:0022414,reproductive process;GO:0050794,regulation of cellular process;GO:0031323,regulation of cellular metabolic process;G…	GO:0005737,cytoplasm;GO:0043229,intracellular organelle;GO:0070062,extracellular vesicular exosome;GO:0043226,organelle;GO:0043228,non-membrane-bounded organelle;GO:0044424,intracellular part;GO:0044464,cell part;GO:0043232,intracellular non-membrane-bounded organelle;GO:0005576,extracellular region;GO:0044446,intracellular organelle part;GO:0043231,intracellular membrane-bounded organelle;GO:004…	GO:0001882,nucleoside binding;GO:0032559,adenyl ribonucleotide binding;GO:0005488,binding;GO:0005515,protein binding;GO:0000166,nucleotide binding;GO:0030554,adenyl nucleotide binding;GO:0001883,purine nucleoside binding;GO:0017076,purine nucleotide binding;GO:0032553,ribonucleotide binding;GO:0032555,purine ribonucleotide binding;GO:0042802,identical protein binding;GO:0005524,ATP binding;GO:005…
123	sp|P55265|DSRAD_HUMAN	Double-stranded RNA-specific adenosine deaminase OS=Homo sapiens OX=9606 GN=ADAR PE=1 SV=4		down	1	0.636135	0.00412241	biological regulation;viral reproduction;reproduction;regulation of biological process;cellular component organization or biogenesis;metabolic process;death;developmental process;multicellular organismal process;negative regulation of biological process;multi-organism process;signaling;reproductive process;localization;immune system process;response to stimulus;establishment of localization;posit…	membrane-enclosed lumen;organelle;cell part;organelle part;cell	catalytic activity;binding		Cytosolic DNA-sensing pathway	GO:0048731,system development;GO:0006913,nucleocytoplasmic transport;GO:0034621,cellular macromolecular complex subunit organization;GO:0050794,regulation of cellular process;GO:0006606,protein import into nucleus;GO:0008152,metabolic process;GO:0050789,regulation of biological process;GO:0043933,macromolecular complex subunit organization;GO:0009607,response to biotic stimulus;GO:0060338,regulat…	GO:0043229,intracellular organelle;GO:0005737,cytoplasm;GO:0043228,non-membrane-bounded organelle;GO:0005634,nucleus;GO:0044424,intracellular part;GO:0043226,organelle;GO:0043232,intracellular non-membrane-bounded organelle;GO:0044464,cell part;GO:0044446,intracellular organelle part;GO:0070013,intracellular organelle lumen;GO:0005730,nucleolus;GO:0043231,intracellular membrane-bounded organelle;…	GO:0016787,hydrolase activity;GO:0016810,hydrolase activity, acting on carbon-nitrogen (but not peptide) bonds;GO:0003824,catalytic activity;GO:0003677,DNA binding;GO:0019239,deaminase activity;GO:0005488,binding;GO:0005515,protein binding;GO:0046872,metal ion binding;GO:0043169,cation binding;GO:0003676,nucleic acid binding;GO:0016814,hydrolase activity, acting on carbon-nitrogen (but not peptid…	ko04623,Cytosolic DNA-sensing pathway
125	sp|Q9NQW6|ANLN_HUMAN	Anillin OS=Homo sapiens OX=9606 GN=ANLN PE=1 SV=2		up	1	1.70808	0.000125028	multicellular organismal process;immune system process;biological regulation;cellular component organization or biogenesis;regulation of biological process;developmental process;cellular process	cell;organelle part;cell part;organelle;membrane-enclosed lumen	binding			GO:0007275,multicellular organismal development;GO:0050789,regulation of biological process;GO:0043933,macromolecular complex subunit organization;GO:0000281,cytokinesis after mitosis;GO:0034621,cellular macromolecular complex subunit organization;GO:0050794,regulation of cellular process;GO:0032501,multicellular organismal process;GO:0070271,protein complex biogenesis;GO:0065007,biological regul…	GO:0005623,cell;GO:0043233,organelle lumen;GO:0044430,cytoskeletal part;GO:0044448,cell cortex part;GO:0005622,intracellular;GO:0044428,nuclear part;GO:0044444,cytoplasmic part;GO:0031974,membrane-enclosed lumen;GO:0031981,nuclear lumen;GO:0044422,organelle part;GO:0005856,cytoskeleton;GO:0005654,nucleoplasm;GO:0043231,intracellular membrane-bounded organelle;GO:0043227,membrane-bounded organelle…	GO:0003779,actin binding;GO:0005515,protein binding;GO:0005488,binding;GO:0008092,cytoskeletal protein binding
126	sp|Q9NYU2|UGGG1_HUMAN	UDP-glucose:glycoprotein glucosyltransferase 1 OS=Homo sapiens OX=9606 GN=UGGT1 PE=1 SV=3		down	1	0.781474	0.0103426	metabolic process;cellular process	extracellular region part;organelle part;cell part;organelle;membrane-enclosed lumen;cell;extracellular region	binding;catalytic activity		Protein processing in endoplasmic reticulum	GO:0018279,protein amino acid N-linked glycosylation via asparagine;GO:0051084,'de novo' posttranslational protein folding;GO:0018193,peptidyl-amino acid modification;GO:0070085,glycosylation;GO:0005975,carbohydrate metabolic process;GO:0034960,cellular biopolymer metabolic process;GO:0044238,primary metabolic process;GO:0009059,macromolecule biosynthetic process;GO:0018196,peptidyl-asparagine mo…	GO:0065010,extracellular membrane-bounded organelle;GO:0031988,membrane-bounded vesicle;GO:0043231,intracellular membrane-bounded organelle;GO:0043227,membrane-bounded organelle;GO:0005793,ER-Golgi intermediate compartment;GO:0044424,intracellular part;GO:0043226,organelle;GO:0005788,endoplasmic reticulum lumen;GO:0070062,extracellular vesicular exosome;GO:0043229,intracellular organelle;GO:00057…	GO:0008194,UDP-glycosyltransferase activity;GO:0003824,catalytic activity;GO:0016740,transferase activity;GO:0046527,glucosyltransferase activity;GO:0051082,unfolded protein binding;GO:0016757,transferase activity, transferring glycosyl groups;GO:0016758,transferase activity, transferring hexosyl groups;GO:0005488,binding;GO:0005515,protein binding	ko04141,Protein processing in endoplasmic reticulum
127	sp|P35998|PRS7_HUMAN	26S proteasome regulatory subunit 7 OS=Homo sapiens OX=9606 GN=PSMC2 PE=1 SV=3		up	1	1.21968	0.0133745	response to stimulus;viral reproduction;biological regulation;immune system process;regulation of biological process;cellular component organization or biogenesis;positive regulation of biological process;developmental process;death;metabolic process;locomotion;signaling;multicellular organismal process;negative regulation of biological process;cellular process	macromolecular complex;cell;organelle;membrane-enclosed lumen;cell part;organelle part	catalytic activity;binding	Posttranslational modification, protein turnover, chaperones ;	Proteasome	GO:0051438,regulation of ubiquitin-protein ligase activity;GO:0045449,regulation of transcription;GO:0048468,cell development;GO:0022008,neurogenesis;GO:0051726,regulation of cell cycle;GO:0010498,proteasomal protein catabolic process;GO:0032868,response to insulin stimulus;GO:0060348,bone development;GO:0044238,primary metabolic process;GO:0002478,antigen processing and presentation of exogenous…	GO:0032991,macromolecular complex;GO:0005654,nucleoplasm;GO:0005829,cytosol;GO:0043227,membrane-bounded organelle;GO:0043231,intracellular membrane-bounded organelle;GO:0044445,cytosolic part;GO:0070013,intracellular organelle lumen;GO:0044446,intracellular organelle part;GO:0044464,cell part;GO:0005634,nucleus;GO:0044424,intracellular part;GO:0043226,organelle;GO:0043229,intracellular organelle;…	GO:0001882,nucleoside binding;GO:0032559,adenyl ribonucleotide binding;GO:0005488,binding;GO:0005515,protein binding;GO:0008233,peptidase activity;GO:0000166,nucleotide binding;GO:0030554,adenyl nucleotide binding;GO:0001883,purine nucleoside binding;GO:0016787,hydrolase activity;GO:0017076,purine nucleotide binding;GO:0003824,catalytic activity;GO:0032555,purine ribonucleotide binding;GO:0032553…	ko03050,Proteasome
129	sp|P40939|ECHA_HUMAN	Trifunctional enzyme subunit alpha, mitochondrial OS=Homo sapiens OX=9606 GN=HADHA PE=1 SV=2		down	1	0.709378	0.00262249	metabolic process;cellular process;response to stimulus	cell part;organelle part;membrane-enclosed lumen;organelle;cell;macromolecular complex	catalytic activity;binding	Lipid transport and metabolism ;	Lysine degradation;beta-Alanine metabolism;Propanoate metabolism;Fatty acid elongation in mitochondria;Biosynthesis of unsaturated fatty acids;Butanoate metabolism;Valine, leucine and isoleucine degradation;Microbial metabolism in diverse environments;Tryptophan metabolism;Metabolic pathways;Fatty acid metabolism	GO:0019637,organophosphate metabolic process;GO:0042493,response to drug;GO:0006644,phospholipid metabolic process;GO:0030258,lipid modification;GO:0043436,oxoacid metabolic process;GO:0050896,response to stimulus;GO:0019752,carboxylic acid metabolic process;GO:0009062,fatty acid catabolic process;GO:0044242,cellular lipid catabolic process;GO:0044248,cellular catabolic process;GO:0009056,catabol…	GO:0005759,mitochondrial matrix;GO:0005739,mitochondrion;GO:0043233,organelle lumen;GO:0005623,cell;GO:0031090,organelle membrane;GO:0044429,mitochondrial part;GO:0043234,protein complex;GO:0044422,organelle part;GO:0042645,mitochondrial nucleoid;GO:0016020,membrane;GO:0031974,membrane-enclosed lumen;GO:0031980,mitochondrial lumen;GO:0044444,cytoplasmic part;GO:0005622,intracellular;GO:0043231,in…	GO:0008289,lipid binding;GO:0000062,acyl-CoA binding;GO:0031406,carboxylic acid binding;GO:0016407,acetyltransferase activity;GO:0005504,fatty acid binding;GO:0033293,monocarboxylic acid binding;GO:0032403,protein complex binding;GO:0016408,C-acyltransferase activity;GO:0016829,lyase activity;GO:0000166,nucleotide binding;GO:0016740,transferase activity;GO:0048037,cofactor binding;GO:0003824,cata…	ko00380,Tryptophan metabolism;ko01120,Microbial metabolism in diverse environments;ko00650,Butanoate metabolism;ko00310,Lysine degradation;ko00280,Valine, leucine and isoleucine degradation;ko00071,Fatty acid metabolism;ko00062,Fatty acid elongation in mitochondria;ko00410,beta-Alanine metabolism;ko00640,Propanoate metabolism;ko01040,Biosynthesis of unsaturated fatty acids;ko01100,Metabolic pathw…
130	sp|P49748|ACADV_HUMAN	Very long-chain specific acyl-CoA dehydrogenase, mitochondrial OS=Homo sapiens OX=9606 GN=ACADVL PE=1 SV=1		down	1	0.761688	0.0036986	developmental process;metabolic process;cellular process;multicellular organismal process;negative regulation of biological process;biological regulation;regulation of biological process	cell;organelle part;cell part;membrane-enclosed lumen;organelle	electron carrier activity;catalytic activity;binding	Lipid transport and metabolism ;	Fatty acid metabolism;Metabolic pathways	GO:0055088,lipid homeostasis;GO:0007275,multicellular organismal development;GO:0044267,cellular protein metabolic process;GO:0001676,long-chain fatty acid metabolic process;GO:0031324,negative regulation of cellular metabolic process;GO:0032501,multicellular organismal process;GO:0009987,cellular process;GO:0043170,macromolecule metabolic process;GO:0019538,protein metabolic process;GO:0031326,r…	GO:0043227,membrane-bounded organelle;GO:0005730,nucleolus;GO:0031967,organelle envelope;GO:0005740,mitochondrial envelope;GO:0019866,organelle inner membrane;GO:0005737,cytoplasm;GO:0043226,organelle;GO:0044424,intracellular part;GO:0044464,cell part;GO:0031975,envelope;GO:0009295,nucleoid;GO:0044446,intracellular organelle part;GO:0070013,intracellular organelle lumen;GO:0005739,mitochondrion;G…	GO:0001882,nucleoside binding;GO:0016491,oxidoreductase activity;GO:0030554,adenyl nucleotide binding;GO:0005488,binding;GO:0009055,electron carrier activity;GO:0003824,catalytic activity;GO:0016627,oxidoreductase activity, acting on the CH-CH group of donors;GO:0048037,cofactor binding;GO:0050662,coenzyme binding;GO:0033293,monocarboxylic acid binding;GO:0003995,acyl-CoA dehydrogenase activity;G…	ko00071,Fatty acid metabolism;ko01100,Metabolic pathways
135	sp|P13797|PLST_HUMAN	Plastin-3 OS=Homo sapiens OX=9606 GN=PLS3 PE=1 SV=4		down	1	0.761239	0.0149444	multicellular organismal process;developmental process;cellular process	cell;organelle part;cell part;organelle	binding	Cytoskeleton ;	Tight junction	GO:0032502,developmental process;GO:0030182,neuron differentiation;GO:0022008,neurogenesis;GO:0007399,nervous system development;GO:0060348,bone development;GO:0048468,cell development;GO:0048513,organ development;GO:0007423,sensory organ development;GO:0048856,anatomical structure development;GO:0009987,cellular process;GO:0048731,system development;GO:0032501,multicellular organismal process;GO…	GO:0005737,cytoplasm;GO:0005902,microvillus;GO:0043229,intracellular organelle;GO:0044424,intracellular part;GO:0043228,non-membrane-bounded organelle;GO:0043226,organelle;GO:0044422,organelle part;GO:0044464,cell part;GO:0043232,intracellular non-membrane-bounded organelle;GO:0005622,intracellular;GO:0042995,cell projection;GO:0005623,cell	GO:0003779,actin binding;GO:0008092,cytoskeletal protein binding;GO:0043167,ion binding;GO:0046872,metal ion binding;GO:0005515,protein binding;GO:0005488,binding;GO:0005509,calcium ion binding;GO:0043169,cation binding	ko04530,Tight junction
138	sp|P08727|K1C19_HUMAN	Keratin, type I cytoskeletal 19 OS=Homo sapiens OX=9606 GN=KRT19 PE=1 SV=4		up	1	1.21082	0.00844575	multicellular organismal process;signaling;cellular process;cellular component organization or biogenesis;regulation of biological process;biological regulation;viral reproduction;response to stimulus;developmental process	organelle part;cell part;extracellular region part;organelle;extracellular region;cell;macromolecular complex	binding;structural molecule activity		Staphylococcus aureus infection;Pathogenic Escherichia coli infection	GO:0055001,muscle cell development;GO:0050794,regulation of cellular process;GO:0042221,response to chemical stimulus;GO:0010033,response to organic substance;GO:0031032,actomyosin structure organization;GO:0032989,cellular component morphogenesis;GO:0030239,myofibril assembly;GO:0007166,cell surface receptor linked signal transduction;GO:0010927,cellular component assembly involved in morphogene…	GO:0005886,plasma membrane;GO:0005623,cell;GO:0043230,extracellular organelle;GO:0030018,Z disc;GO:0031982,vesicle;GO:0044444,cytoplasmic part;GO:0065010,extracellular membrane-bounded organelle;GO:0043034,costamere;GO:0043292,contractile fiber;GO:0005856,cytoskeleton;GO:0043228,non-membrane-bounded organelle;GO:0070062,extracellular vesicular exosome;GO:0043229,intracellular organelle;GO:0030017…	GO:0008307,structural constituent of muscle;GO:0005515,protein binding;GO:0005488,binding;GO:0005200,structural constituent of cytoskeleton;GO:0032403,protein complex binding;GO:0005198,structural molecule activity	ko05130,Pathogenic Escherichia coli infection;ko05150,Staphylococcus aureus infection
141	sp|P04843|RPN1_HUMAN	Dolichyl-diphosphooligosaccharide--protein glycosyltransferase subunit 1 OS=Homo sapiens OX=9606 GN=RPN1 PE=1 SV=1		down	1	0.483054	9.0583e-05	cellular process;establishment of localization;metabolic process;localization	macromolecular complex;cell;cell part;organelle part;organelle	catalytic activity;binding		Protein processing in endoplasmic reticulum;Metabolic pathways;N-Glycan biosynthesis	GO:0018196,peptidyl-asparagine modification;GO:0009059,macromolecule biosynthetic process;GO:0044262,cellular carbohydrate metabolic process;GO:0006605,protein targeting;GO:0051234,establishment of localization;GO:0006487,protein amino acid N-linked glycosylation;GO:0044260,cellular macromolecule metabolic process;GO:0010467,gene expression;GO:0045047,protein targeting to ER;GO:0043284,biopolymer…	GO:0043227,membrane-bounded organelle;GO:0031410,cytoplasmic vesicle;GO:0031988,membrane-bounded vesicle;GO:0042175,nuclear envelope-endoplasmic reticulum network;GO:0032991,macromolecular complex;GO:0008250,oligosaccharyltransferase complex;GO:0005737,cytoplasm;GO:0044424,intracellular part;GO:0043226,organelle;GO:0044425,membrane part;GO:0042470,melanosome;GO:0044464,cell part;GO:0044446,intrac…	GO:0004576,oligosaccharyl transferase activity;GO:0016740,transferase activity;GO:0003824,catalytic activity;GO:0004579,dolichyl-diphosphooligosaccharide-protein glycotransferase activity;GO:0016757,transferase activity, transferring glycosyl groups;GO:0016758,transferase activity, transferring hexosyl groups;GO:0005488,binding;GO:0005515,protein binding	ko04141,Protein processing in endoplasmic reticulum;ko01100,Metabolic pathways;ko00510,N-Glycan biosynthesis
142	sp|P55884|EIF3B_HUMAN	Eukaryotic translation initiation factor 3 subunit B OS=Homo sapiens OX=9606 GN=EIF3B PE=1 SV=3		up	1	1.45398	0.00449727	metabolic process;cellular process;biological regulation;cellular component organization or biogenesis;regulation of biological process	extracellular region part;cell part;organelle;macromolecular complex;extracellular region;cell;organelle part;membrane-enclosed lumen	structural molecule activity;binding	General function prediction only ;	RNA transport	GO:0001731,formation of translation preinitiation complex;GO:0043170,macromolecule metabolic process;GO:0065003,macromolecular complex assembly;GO:0065007,biological regulation;GO:0009987,cellular process;GO:0034621,cellular macromolecular complex subunit organization;GO:0019538,protein metabolic process;GO:0031323,regulation of cellular metabolic process;GO:0050794,regulation of cellular process…	GO:0044464,cell part;GO:0005576,extracellular region;GO:0044446,intracellular organelle part;GO:0070013,intracellular organelle lumen;GO:0043229,intracellular organelle;GO:0016282,eukaryotic 43S preinitiation complex;GO:0005737,cytoplasm;GO:0043226,organelle;GO:0005634,nucleus;GO:0044424,intracellular part;GO:0070062,extracellular vesicular exosome;GO:0005654,nucleoplasm;GO:0005829,cytosol;GO:003…	GO:0005198,structural molecule activity;GO:0003676,nucleic acid binding;GO:0005488,binding;GO:0005515,protein binding;GO:0000166,nucleotide binding;GO:0045182,translation regulator activity;GO:0031369,translation initiation factor binding;GO:0008135,translation factor activity, nucleic acid binding;GO:0032947,protein complex scaffold;GO:0003743,translation initiation factor activity	ko03013,RNA transport
148	sp|O00571|DDX3X_HUMAN	ATP-dependent RNA helicase DDX3X OS=Homo sapiens OX=9606 GN=DDX3X PE=1 SV=3		up	1	1.27389	0.0299338	cellular process;positive regulation of biological process;immune system process;response to stimulus;negative regulation of biological process;multicellular organismal process;multi-organism process;signaling;reproductive process;metabolic process;death;biological regulation;viral reproduction;regulation of biological process;reproduction;cellular component organization or biogenesis;growth	cell;extracellular region;macromolecular complex;organelle;cell part;extracellular region part;membrane-enclosed lumen;organelle part	binding;catalytic activity	Replication, recombination and repair ; Transcription ; Translation, ribosomal structure and biogenesis ;	RIG-I-like receptor signaling pathway	GO:0022618,ribonucleoprotein complex assembly;GO:0043085,positive regulation of catalytic activity;GO:0051336,regulation of hydrolase activity;GO:0010941,regulation of cell death;GO:0001817,regulation of cytokine production;GO:0044092,negative regulation of molecular function;GO:0010557,positive regulation of macromolecule biosynthetic process;GO:0010605,negative regulation of macromolecule metab…	GO:0065010,extracellular membrane-bounded organelle;GO:0043231,intracellular membrane-bounded organelle;GO:0022627,cytosolic small ribosomal subunit;GO:0031966,mitochondrial membrane;GO:0070062,extracellular vesicular exosome;GO:0043228,non-membrane-bounded organelle;GO:0005634,nucleus;GO:0043229,intracellular organelle;GO:0043232,intracellular non-membrane-bounded organelle;GO:0005576,extracellu…	GO:0005488,binding;GO:0003676,nucleic acid binding;GO:0003724,RNA helicase activity;GO:0043021,ribonucleoprotein binding;GO:0032555,purine ribonucleotide binding;GO:0016787,hydrolase activity;GO:0070035,purine NTP-dependent helicase activity;GO:0003824,catalytic activity;GO:0016817,hydrolase activity, acting on acid anhydrides;GO:0004386,helicase activity;GO:0003729,mRNA binding;GO:0001883,purine…	ko04622,RIG-I-like receptor signaling pathway
149	sp|Q92598|HS105_HUMAN	Heat shock protein 105 kDa OS=Homo sapiens OX=9606 GN=HSPH1 PE=1 SV=1		up	1	1.60088	0.00205209	localization;cellular process;response to stimulus;biological regulation;immune system process;regulation of biological process;cellular component organization or biogenesis;positive regulation of biological process;establishment of localization;metabolic process	membrane-enclosed lumen;organelle part;macromolecular complex;cell;extracellular region;organelle;cell part;extracellular region part	binding	Posttranslational modification, protein turnover, chaperones ;	Protein processing in endoplasmic reticulum	GO:0080090,regulation of primary metabolic process;GO:0016044,membrane organization;GO:0010324,membrane invagination;GO:0051179,localization;GO:0010604,positive regulation of macromolecule metabolic process;GO:0051252,regulation of RNA metabolic process;GO:0002696,positive regulation of leukocyte activation;GO:0060255,regulation of macromolecule metabolic process;GO:0051084,'de novo' posttranslat…	GO:0044430,cytoskeletal part;GO:0044421,extracellular region part;GO:0005622,intracellular;GO:0031974,membrane-enclosed lumen;GO:0005874,microtubule;GO:0031981,nuclear lumen;GO:0044422,organelle part;GO:0015630,microtubule cytoskeleton;GO:0044464,cell part;GO:0044446,intracellular organelle part;GO:0070013,intracellular organelle lumen;GO:0005737,cytoplasm;GO:0043226,organelle;GO:0044424,intracel…	GO:0005524,ATP binding;GO:0008092,cytoskeletal protein binding;GO:0032553,ribonucleotide binding;GO:0032555,purine ribonucleotide binding;GO:0017076,purine nucleotide binding;GO:0015631,tubulin binding;GO:0001883,purine nucleoside binding;GO:0000166,nucleotide binding;GO:0030554,adenyl nucleotide binding;GO:0005515,protein binding;GO:0005488,binding;GO:0032559,adenyl ribonucleotide binding;GO:000…	ko04141,Protein processing in endoplasmic reticulum
151	sp|P50991|TCPD_HUMAN	T-complex protein 1 subunit delta OS=Homo sapiens OX=9606 GN=CCT4 PE=1 SV=4		up	1	1.93585	0.00221527	regulation of biological process;cellular component organization or biogenesis;reproduction;biological regulation;metabolic process;positive regulation of biological process;multicellular organismal process;reproductive process;cellular process	cell part;extracellular region part;organelle;extracellular region;cell;macromolecular complex;organelle part;membrane-enclosed lumen	binding	Posttranslational modification, protein turnover, chaperones ;		GO:0032844,regulation of homeostatic process;GO:0033043,regulation of organelle organization;GO:0044238,primary metabolic process;GO:0034960,cellular biopolymer metabolic process;GO:0010556,regulation of macromolecule biosynthetic process;GO:0019219,regulation of nucleobase, nucleoside, nucleotide and nucleic acid metabolic process;GO:0065008,regulation of biological quality;GO:0007338,single fer…	GO:0043227,membrane-bounded organelle;GO:0044445,cytosolic part;GO:0031988,membrane-bounded vesicle;GO:0031410,cytoplasmic vesicle;GO:0005813,centrosome;GO:0005829,cytosol;GO:0005654,nucleoplasm;GO:0032991,macromolecular complex;GO:0005737,cytoplasm;GO:0044424,intracellular part;GO:0043226,organelle;GO:0044464,cell part;GO:0042470,melanosome;GO:0070013,intracellular organelle lumen;GO:0044446,int…	GO:0005524,ATP binding;GO:0051082,unfolded protein binding;GO:0032553,ribonucleotide binding;GO:0032555,purine ribonucleotide binding;GO:0017076,purine nucleotide binding;GO:0000166,nucleotide binding;GO:0030554,adenyl nucleotide binding;GO:0001883,purine nucleoside binding;GO:0005488,binding;GO:0005515,protein binding;GO:0032559,adenyl ribonucleotide binding;GO:0001882,nucleoside binding
159	sp|P78344|IF4G2_HUMAN	Eukaryotic translation initiation factor 4 gamma 2 OS=Homo sapiens OX=9606 GN=EIF4G2 PE=1 SV=1		up	1	1.53185	7.33755e-05	death;metabolic process;regulation of biological process;response to stimulus;biological regulation;cellular process;signaling;negative regulation of biological process	cell part;cell;macromolecular complex	binding		RNA transport;Viral myocarditis	GO:0006446,regulation of translational initiation;GO:0031323,regulation of cellular metabolic process;GO:0050794,regulation of cellular process;GO:0031326,regulation of cellular biosynthetic process;GO:0051246,regulation of protein metabolic process;GO:0007166,cell surface receptor linked signal transduction;GO:0009987,cellular process;GO:0065007,biological regulation;GO:0022402,cell cycle proces…	GO:0005623,cell;GO:0032991,macromolecular complex;GO:0005829,cytosol;GO:0005622,intracellular;GO:0044444,cytoplasmic part;GO:0016020,membrane;GO:0044464,cell part;GO:0044424,intracellular part;GO:0043234,protein complex;GO:0016281,eukaryotic translation initiation factor 4F complex;GO:0005737,cytoplasm	GO:0005515,protein binding;GO:0005488,binding;GO:0003743,translation initiation factor activity;GO:0045182,translation regulator activity;GO:0003676,nucleic acid binding;GO:0008135,translation factor activity, nucleic acid binding	ko05416,Viral myocarditis;ko03013,RNA transport
163	sp|Q9BSJ8|ESYT1_HUMAN	Extended synaptotagmin-1 OS=Homo sapiens OX=9606 GN=ESYT1 PE=1 SV=1		down	1	0.58691	0.00263636	localization;establishment of localization	cell;organelle;cell part;organelle part	binding	General function prediction only ;	Purine metabolism;Huntington's disease;RNA polymerase;Pyrimidine metabolism;Metabolic pathways;Phosphatidylinositol signaling system;Inositol phosphate metabolism	GO:0006810,transport;GO:0051234,establishment of localization;GO:0006869,lipid transport;GO:0051179,localization	GO:0044444,cytoplasmic part;GO:0005622,intracellular;GO:0016020,membrane;GO:0005783,endoplasmic reticulum;GO:0044432,endoplasmic reticulum part;GO:0031227,intrinsic to endoplasmic reticulum membrane;GO:0044422,organelle part;GO:0031090,organelle membrane;GO:0005623,cell;GO:0005886,plasma membrane;GO:0031301,integral to organelle membrane;GO:0012505,endomembrane system;GO:0044446,intracellular org…	GO:0005515,protein binding;GO:0005488,binding;GO:0046872,metal ion binding;GO:0043169,cation binding;GO:0008289,lipid binding;GO:0043167,ion binding	ko03020,RNA polymerase;ko05016,Huntington's disease;ko01100,Metabolic pathways;ko04070,Phosphatidylinositol signaling system;ko00230,Purine metabolism;ko00240,Pyrimidine metabolism;ko00562,Inositol phosphate metabolism
166	sp|Q13423|NNTM_HUMAN	NAD(P) transhydrogenase, mitochondrial OS=Homo sapiens OX=9606 GN=NNT PE=1 SV=3		down	1	0.762836	0.000401722	metabolic process;cellular process;biological regulation;regulation of biological process	organelle;organelle part;cell part;cell	transporter activity;binding;catalytic activity	Energy production and conversion ;	Nicotinate and nicotinamide metabolism;Metabolic pathways	GO:0044238,primary metabolic process;GO:0045333,cellular respiration;GO:0019748,secondary metabolic process;GO:0009060,aerobic respiration;GO:0009820,alkaloid metabolic process;GO:0006807,nitrogen compound metabolic process;GO:0019362,pyridine nucleotide metabolic process;GO:0006739,NADP metabolic process;GO:0009109,coenzyme catabolic process;GO:0006091,generation of precursor metabolites and ene…	GO:0070469,respiratory chain;GO:0005740,mitochondrial envelope;GO:0019866,organelle inner membrane;GO:0031967,organelle envelope;GO:0043231,intracellular membrane-bounded organelle;GO:0043227,membrane-bounded organelle;GO:0005743,mitochondrial inner membrane;GO:0031966,mitochondrial membrane;GO:0016021,integral to membrane;GO:0031224,intrinsic to membrane;GO:0044425,membrane part;GO:0043226,organ…	GO:0015075,ion transmembrane transporter activity;GO:0005215,transporter activity;GO:0022892,substrate-specific transporter activity;GO:0051287,NAD or NADH binding;GO:0016491,oxidoreductase activity;GO:0005488,binding;GO:0016651,oxidoreductase activity, acting on NADH or NADPH;GO:0050661,NADP or NADPH binding;GO:0003824,catalytic activity;GO:0022890,inorganic cation transmembrane transporter acti…	ko00760,Nicotinate and nicotinamide metabolism;ko01100,Metabolic pathways
173	sp|Q08J23|NSUN2_HUMAN	RNA cytosine C(5)-methyltransferase NSUN2 OS=Homo sapiens OX=9606 GN=NSUN2 PE=1 SV=2		up	1	1.33968	0.0417165	reproduction;regulation of biological process;cellular component organization or biogenesis;biological regulation;developmental process;metabolic process;reproductive process;negative regulation of biological process;multicellular organismal process;cellular process	membrane-enclosed lumen;organelle;cell part;organelle part;cell;macromolecular complex	binding;catalytic activity	Translation, ribosomal structure and biogenesis ;	Tyrosine metabolism;Histidine metabolism;Selenoamino acid metabolism;Microbial metabolism in diverse environments	GO:0048232,male gamete generation;GO:0043414,biopolymer methylation;GO:0009451,RNA modification;GO:0043412,biopolymer modification;GO:0006807,nitrogen compound metabolic process;GO:0048285,organelle fission;GO:0006996,organelle organization;GO:0034470,ncRNA processing;GO:0048468,cell development;GO:0051726,regulation of cell cycle;GO:0006730,one-carbon metabolic process;GO:0000075,cell cycle chec…	GO:0015630,microtubule cytoskeleton;GO:0043233,organelle lumen;GO:0005623,cell;GO:0031981,nuclear lumen;GO:0030529,ribonucleoprotein complex;GO:0044422,organelle part;GO:0044430,cytoskeletal part;GO:0031974,membrane-enclosed lumen;GO:0044428,nuclear part;GO:0005622,intracellular;GO:0043227,membrane-bounded organelle;GO:0043231,intracellular membrane-bounded organelle;GO:0005730,nucleolus;GO:00058…	GO:0016741,transferase activity, transferring one-carbon groups;GO:0008173,RNA methyltransferase activity;GO:0005488,binding;GO:0003723,RNA binding;GO:0008168,methyltransferase activity;GO:0003676,nucleic acid binding;GO:0008757,S-adenosylmethionine-dependent methyltransferase activity;GO:0003824,catalytic activity;GO:0000049,tRNA binding;GO:0016740,transferase activity	ko00340,Histidine metabolism;ko01120,Microbial metabolism in diverse environments;ko00350,Tyrosine metabolism;ko00450,Selenoamino acid metabolism
174	sp|Q9UHD8|SEPT9_HUMAN	Septin-9 OS=Homo sapiens OX=9606 GN=SEPTIN9 PE=1 SV=2		down	1	0.767721	0.00409358	cellular process;cellular component organization or biogenesis	organelle part;cell part;organelle;cell;macromolecular complex	binding;catalytic activity	Cell cycle control, cell division, chromosome partitioning ; Cytoskeleton ;	Parkinson's disease	GO:0044085,cellular component biogenesis;GO:0006461,protein complex assembly;GO:0007049,cell cycle;GO:0043933,macromolecular complex subunit organization;GO:0022607,cellular component assembly;GO:0009987,cellular process;GO:0070271,protein complex biogenesis;GO:0065003,macromolecular complex assembly;GO:0051259,protein oligomerization;GO:0016043,cellular component organization;GO:0010926,anatomic…	GO:0005929,cilium;GO:0005622,intracellular;GO:0044444,cytoplasmic part;GO:0044430,cytoskeletal part;GO:0044448,cell cortex part;GO:0005930,axoneme;GO:0043234,protein complex;GO:0044422,organelle part;GO:0005874,microtubule;GO:0042641,actomyosin;GO:0005623,cell;GO:0015630,microtubule cytoskeleton;GO:0044446,intracellular organelle part;GO:0015629,actin cytoskeleton;GO:0043232,intracellular non-mem…	GO:0000166,nucleotide binding;GO:0005525,GTP binding;GO:0017111,nucleoside-triphosphatase activity;GO:0032553,ribonucleotide binding;GO:0016462,pyrophosphatase activity;GO:0017076,purine nucleotide binding;GO:0032561,guanyl ribonucleotide binding;GO:0019001,guanyl nucleotide binding;GO:0016818,hydrolase activity, acting on acid anhydrides, in phosphorus-containing anhydrides;GO:0005515,protein bi…	ko05012,Parkinson's disease
177	sp|Q99613|EIF3C_HUMAN	Eukaryotic translation initiation factor 3 subunit C OS=Homo sapiens OX=9606 GN=EIF3C PE=1 SV=1		up	1	1.39143	1.46604e-05	regulation of biological process;cellular component organization or biogenesis;biological regulation;cellular process;metabolic process	cell part;cell;macromolecular complex	binding		RNA transport	GO:0010608,posttranscriptional regulation of gene expression;GO:0044249,cellular biosynthetic process;GO:0009058,biosynthetic process;GO:0044237,cellular metabolic process;GO:0019222,regulation of metabolic process;GO:0009889,regulation of biosynthetic process;GO:0016043,cellular component organization;GO:0043283,biopolymer metabolic process;GO:0006446,regulation of translational initiation;GO:00…	GO:0032991,macromolecular complex;GO:0005623,cell;GO:0005829,cytosol;GO:0044424,intracellular part;GO:0030529,ribonucleoprotein complex;GO:0016282,eukaryotic 43S preinitiation complex;GO:0005737,cytoplasm;GO:0005622,intracellular;GO:0033290,eukaryotic 48S preinitiation complex;GO:0044444,cytoplasmic part;GO:0044464,cell part	GO:0003676,nucleic acid binding;GO:0031369,translation initiation factor binding;GO:0045182,translation regulator activity;GO:0008135,translation factor activity, nucleic acid binding;GO:0005488,binding;GO:0005515,protein binding;GO:0003743,translation initiation factor activity	ko03013,RNA transport
181	sp|Q14974|IMB1_HUMAN	Importin subunit beta-1 OS=Homo sapiens OX=9606 GN=KPNB1 PE=1 SV=2		up	1	1.77609	0.038807	cellular process;localization;signaling;reproductive process;multi-organism process;metabolic process;death;establishment of localization;cellular component organization or biogenesis;reproduction;regulation of biological process;biological regulation;viral reproduction;response to stimulus	membrane-enclosed lumen;organelle part;organelle;extracellular region part;cell part;macromolecular complex;extracellular region;cell	transporter activity;binding	Intracellular trafficking, secretion, and vesicular transport ;	RNA transport	GO:0000279,M phase;GO:0006886,intracellular protein transport;GO:0022403,cell cycle phase;GO:0000087,M phase of mitotic cell cycle;GO:0009987,cellular process;GO:0007166,cell surface receptor linked signal transduction;GO:0070271,protein complex biogenesis;GO:0043170,macromolecule metabolic process;GO:0065003,macromolecular complex assembly;GO:0051641,cellular localization;GO:0006997,nucleus orga…	GO:0016021,integral to membrane;GO:0005643,nuclear pore;GO:0043231,intracellular membrane-bounded organelle;GO:0065010,extracellular membrane-bounded organelle;GO:0005576,extracellular region;GO:0043229,intracellular organelle;GO:0005634,nucleus;GO:0070062,extracellular vesicular exosome;GO:0031224,intrinsic to membrane;GO:0005623,cell;GO:0043230,extracellular organelle;GO:0043233,organelle lumen…	GO:0043169,cation binding;GO:0008565,protein transporter activity;GO:0019899,enzyme binding;GO:0042277,peptide binding;GO:0017016,Ras GTPase binding;GO:0019904,protein domain specific binding;GO:0046914,transition metal ion binding;GO:0008536,Ran GTPase binding;GO:0008270,zinc ion binding;GO:0051020,GTPase binding;GO:0046872,metal ion binding;GO:0005515,protein binding;GO:0005488,binding;GO:00052…	ko03013,RNA transport
182	sp|P40227|TCPZ_HUMAN	T-complex protein 1 subunit zeta OS=Homo sapiens OX=9606 GN=CCT6A PE=1 SV=3		up	1	2.24087	0.000127441	cellular process;metabolic process;positive regulation of biological process;cellular component organization or biogenesis;regulation of biological process;biological regulation	macromolecular complex;extracellular region;cell;organelle;extracellular region part;organelle part;cell part	binding	Posttranslational modification, protein turnover, chaperones ;		GO:0010468,regulation of gene expression;GO:0051054,positive regulation of DNA metabolic process;GO:0031325,positive regulation of cellular metabolic process;GO:0045740,positive regulation of DNA replication;GO:0010557,positive regulation of macromolecule biosynthetic process;GO:0010638,positive regulation of organelle organization;GO:0048522,positive regulation of cellular process;GO:0051130,pos…	GO:0044446,intracellular organelle part;GO:0043232,intracellular non-membrane-bounded organelle;GO:0044464,cell part;GO:0005576,extracellular region;GO:0070062,extracellular vesicular exosome;GO:0043228,non-membrane-bounded organelle;GO:0043226,organelle;GO:0044424,intracellular part;GO:0005737,cytoplasm;GO:0043229,intracellular organelle;GO:0032991,macromolecular complex;GO:0005832,chaperonin-co…	GO:0017076,purine nucleotide binding;GO:0051082,unfolded protein binding;GO:0005524,ATP binding;GO:0032553,ribonucleotide binding;GO:0032555,purine ribonucleotide binding;GO:0032559,adenyl ribonucleotide binding;GO:0001882,nucleoside binding;GO:0001883,purine nucleoside binding;GO:0000166,nucleotide binding;GO:0030554,adenyl nucleotide binding;GO:0005515,protein binding;GO:0005488,binding
183	sp|Q14764|MVP_HUMAN	Major vault protein OS=Homo sapiens OX=9606 GN=MVP PE=1 SV=4		down	1	0.554407	0.00764605	biological regulation;regulation of biological process;metabolic process;establishment of localization;negative regulation of biological process;signaling;localization;cellular process	extracellular region part;organelle part;cell part;organelle;extracellular region;cell;macromolecular complex	binding			GO:0031399,regulation of protein modification process;GO:0015031,protein transport;GO:0042325,regulation of phosphorylation;GO:0019220,regulation of phosphate metabolic process;GO:0048519,negative regulation of biological process;GO:0051246,regulation of protein metabolic process;GO:0019222,regulation of metabolic process;GO:0048523,negative regulation of cellular process;GO:0010563,negative regu…	GO:0043234,protein complex;GO:0044422,organelle part;GO:0044421,extracellular region part;GO:0016020,membrane;GO:0005622,intracellular;GO:0048471,perinuclear region of cytoplasm;GO:0043227,membrane-bounded organelle;GO:0005635,nuclear envelope;GO:0031967,organelle envelope;GO:0031988,membrane-bounded vesicle;GO:0032991,macromolecular complex;GO:0005737,cytoplasm;GO:0044424,intracellular part;GO:0…	GO:0019901,protein kinase binding;GO:0019902,phosphatase binding;GO:0019899,enzyme binding;GO:0005515,protein binding;GO:0005488,binding;GO:0019903,protein phosphatase binding;GO:0019900,kinase binding
186	sp|O94906|PRP6_HUMAN	Pre-mRNA-processing factor 6 OS=Homo sapiens OX=9606 GN=PRPF6 PE=1 SV=1		up	1	1.21586	0.00843346	positive regulation of biological process;metabolic process;cellular process;biological regulation;regulation of biological process;cellular component organization or biogenesis;localization	organelle part;cell part;membrane-enclosed lumen;organelle;cell;macromolecular complex	binding;protein binding transcription factor activity	General function prediction only ;	Spliceosome	GO:0031328,positive regulation of cellular biosynthetic process;GO:0043283,biopolymer metabolic process;GO:0044237,cellular metabolic process;GO:0019222,regulation of metabolic process;GO:0051171,regulation of nitrogen compound metabolic process;GO:0009889,regulation of biosynthetic process;GO:0016071,mRNA metabolic process;GO:0045935,positive regulation of nucleobase, nucleoside, nucleotide and …	GO:0005623,cell;GO:0043233,organelle lumen;GO:0044428,nuclear part;GO:0031974,membrane-enclosed lumen;GO:0005622,intracellular;GO:0044451,nucleoplasm part;GO:0016020,membrane;GO:0005681,spliceosomal complex;GO:0030529,ribonucleoprotein complex;GO:0005682,U5 snRNP;GO:0044422,organelle part;GO:0071013,catalytic step 2 spliceosome;GO:0016604,nuclear body;GO:0031981,nuclear lumen;GO:0032991,macromole…	GO:0050681,androgen receptor binding;GO:0003712,transcription cofactor activity;GO:0051427,hormone receptor binding;GO:0043021,ribonucleoprotein binding;GO:0003713,transcription coactivator activity;GO:0035257,nuclear hormone receptor binding;GO:0016563,transcription activator activity;GO:0035258,steroid hormone receptor binding;GO:0005515,protein binding;GO:0005488,binding;GO:0005102,receptor bi…	ko03040,Spliceosome
193	sp|Q8TCS8|PNPT1_HUMAN	Polyribonucleotide nucleotidyltransferase 1, mitochondrial OS=Homo sapiens OX=9606 GN=PNPT1 PE=1 SV=2		down	1	0.69611	0.00454884	growth;regulation of biological process;cellular component organization or biogenesis;response to stimulus;biological regulation;positive regulation of biological process;metabolic process;developmental process;negative regulation of biological process;cellular process	organelle;membrane-enclosed lumen;cell part;organelle part;macromolecular complex;cell	catalytic activity;binding	Translation, ribosomal structure and biogenesis ;	Pyrimidine metabolism;Purine metabolism;RNA degradation	GO:0034960,cellular biopolymer metabolic process;GO:0044238,primary metabolic process;GO:0031331,positive regulation of cellular catabolic process;GO:0034962,cellular biopolymer catabolic process;GO:0006807,nitrogen compound metabolic process;GO:0043467,regulation of generation of precursor metabolites and energy;GO:0044085,cellular component biogenesis;GO:0006402,mRNA catabolic process;GO:005079…	GO:0031970,organelle envelope lumen;GO:0043231,intracellular membrane-bounded organelle;GO:0043227,membrane-bounded organelle;GO:0031967,organelle envelope;GO:0005740,mitochondrial envelope;GO:0044464,cell part;GO:0044446,intracellular organelle part;GO:0031975,envelope;GO:0043229,intracellular organelle;GO:0005737,cytoplasm;GO:0044424,intracellular part;GO:0043226,organelle;GO:0005623,cell;GO:00…	GO:0003676,nucleic acid binding;GO:0004518,nuclease activity;GO:0005488,binding;GO:0005515,protein binding;GO:0008187,poly-pyrimidine tract binding;GO:0016787,hydrolase activity;GO:0016740,transferase activity;GO:0003824,catalytic activity;GO:0016779,nucleotidyltransferase activity;GO:0008266,poly(U) RNA binding;GO:0008408,3'-5' exonuclease activity;GO:0016772,transferase activity, transferring p…	ko00230,Purine metabolism;ko03018,RNA degradation;ko00240,Pyrimidine metabolism
195	sp|Q16658|FSCN1_HUMAN	Fascin OS=Homo sapiens OX=9606 GN=FSCN1 PE=1 SV=3		down	1	0.775178	0.021478	cellular process;localization;cell proliferation;locomotion;positive regulation of biological process;regulation of biological process;cellular component organization or biogenesis;biological regulation	cell;extracellular region;macromolecular complex;cell part;organelle part;extracellular region part;organelle	binding			GO:0007163,establishment or maintenance of cell polarity;GO:0022607,cellular component assembly;GO:0051130,positive regulation of cellular component organization;GO:0007010,cytoskeleton organization;GO:0031346,positive regulation of cell projection organization;GO:0045216,cell-cell junction organization;GO:0048522,positive regulation of cellular process;GO:0051493,regulation of cytoskeleton organ…	GO:0042995,cell projection;GO:0065010,extracellular membrane-bounded organelle;GO:0043209,myelin sheath;GO:0032432,actin filament bundle;GO:0005856,cytoskeleton;GO:0043228,non-membrane-bounded organelle;GO:0070062,extracellular vesicular exosome;GO:0043229,intracellular organelle;GO:0044463,cell projection part;GO:0044459,plasma membrane part;GO:0015629,actin cytoskeleton;GO:0043232,intracellular…	GO:0005515,protein binding;GO:0005488,binding;GO:0008092,cytoskeletal protein binding;GO:0030674,protein binding, bridging;GO:0003779,actin binding;GO:0051015,actin filament binding;GO:0008144,drug binding
198	sp|P36578|RL4_HUMAN	60S ribosomal protein L4 OS=Homo sapiens OX=9606 GN=RPL4 PE=1 SV=5		up	1	1.56585	0.00369107	cellular process;reproductive process;localization;establishment of localization;metabolic process;viral reproduction;reproduction;cellular component organization or biogenesis	extracellular region;cell;macromolecular complex;extracellular region part;cell part;organelle;organelle part;membrane-enclosed lumen	structural molecule activity;binding	Translation, ribosomal structure and biogenesis ;	Ribosome	GO:0022411,cellular component disassembly;GO:0001887,selenium metabolic process;GO:0006351,transcription, DNA-dependent;GO:0006612,protein targeting to membrane;GO:0046907,intracellular transport;GO:0045184,establishment of protein localization;GO:0006082,organic acid metabolic process;GO:0006413,translational initiation;GO:0000003,reproduction;GO:0051179,localization;GO:0016070,RNA metabolic pro…	GO:0005622,intracellular;GO:0031974,membrane-enclosed lumen;GO:0044421,extracellular region part;GO:0016020,membrane;GO:0044422,organelle part;GO:0031981,nuclear lumen;GO:0022626,cytosolic ribosome;GO:0044446,intracellular organelle part;GO:0070013,intracellular organelle lumen;GO:0044464,cell part;GO:0033279,ribosomal subunit;GO:0044424,intracellular part;GO:0043226,organelle;GO:0044425,membrane…	GO:0005198,structural molecule activity;GO:0003735,structural constituent of ribosome;GO:0005488,binding;GO:0005515,protein binding	ko03010,Ribosome
200	sp|P33991|MCM4_HUMAN	DNA replication licensing factor MCM4 OS=Homo sapiens OX=9606 GN=MCM4 PE=1 SV=5		down	1	0.650511	0.0410642	biological regulation;negative regulation of biological process;regulation of biological process;metabolic process;cellular process	organelle part;cell part;organelle;membrane-enclosed lumen;macromolecular complex;cell	catalytic activity;binding	Replication, recombination and repair ;	Cell cycle;DNA replication	GO:0032392,DNA geometric change;GO:0044249,cellular biosynthetic process;GO:0044237,cellular metabolic process;GO:0009058,biosynthetic process;GO:0000082,G1/S transition of mitotic cell cycle;GO:0043283,biopolymer metabolic process;GO:0032508,DNA duplex unwinding;GO:0034645,cellular macromolecule biosynthetic process;GO:0006139,nucleobase, nucleoside, nucleotide and nucleic acid metabolic process…	GO:0044446,intracellular organelle part;GO:0070013,intracellular organelle lumen;GO:0043232,intracellular non-membrane-bounded organelle;GO:0044464,cell part;GO:0005634,nucleus;GO:0044424,intracellular part;GO:0043228,non-membrane-bounded organelle;GO:0043226,organelle;GO:0043229,intracellular organelle;GO:0032991,macromolecular complex;GO:0005654,nucleoplasm;GO:0000228,nuclear chromosome;GO:0044…	GO:0003677,DNA binding;GO:0000166,nucleotide binding;GO:0001883,purine nucleoside binding;GO:0032559,adenyl ribonucleotide binding;GO:0008026,ATP-dependent helicase activity;GO:0032553,ribonucleotide binding;GO:0008094,DNA-dependent ATPase activity;GO:0003678,DNA helicase activity;GO:0004003,ATP-dependent DNA helicase activity;GO:0003697,single-stranded DNA binding;GO:0017111,nucleoside-triphosph…	ko04110,Cell cycle;ko03030,DNA replication
202	sp|P53618|COPB_HUMAN	Coatomer subunit beta OS=Homo sapiens OX=9606 GN=COPB1 PE=1 SV=3		up	1	1.47737	0.0162614	localization;cellular component organization or biogenesis;viral reproduction;cellular process;establishment of localization;metabolic process	cell part;organelle part;organelle;macromolecular complex;cell	structural molecule activity;binding	Intracellular trafficking, secretion, and vesicular transport ;	Lysosome	GO:0043170,macromolecule metabolic process;GO:0009987,cellular process;GO:0019538,protein metabolic process;GO:0051656,establishment of organelle localization;GO:0051641,cellular localization;GO:0006464,protein modification process;GO:0009100,glycoprotein metabolic process;GO:0006900,membrane budding;GO:0008152,metabolic process;GO:0006810,transport;GO:0044267,cellular protein metabolic process;G…	GO:0044444,cytoplasmic part;GO:0030120,vesicle coat;GO:0005794,Golgi apparatus;GO:0031982,vesicle;GO:0030117,membrane coat;GO:0031090,organelle membrane;GO:0012506,vesicle membrane;GO:0005886,plasma membrane;GO:0030663,COPI coated vesicle membrane;GO:0005623,cell;GO:0030659,cytoplasmic vesicle membrane;GO:0012505,endomembrane system;GO:0030135,coated vesicle;GO:0043229,intracellular organelle;GO:…	GO:0005198,structural molecule activity;GO:0005488,binding;GO:0005515,protein binding	ko04142,Lysosome
205	sp|P21980|TGM2_HUMAN	Protein-glutamine gamma-glutamyltransferase 2 OS=Homo sapiens OX=9606 GN=TGM2 PE=1 SV=2		up	1	1.46198	0.00281025	biological regulation;response to stimulus;cellular component organization or biogenesis;regulation of biological process;developmental process;metabolic process;death;establishment of localization;positive regulation of biological process;biological adhesion;multicellular organismal process;signaling;localization;cellular process	extracellular region part;cell part;organelle;extracellular region;cell	catalytic activity;binding		Huntington's disease	GO:0044267,cellular protein metabolic process;GO:0007275,multicellular organismal development;GO:0006464,protein modification process;GO:0042981,regulation of apoptosis;GO:0019538,protein metabolic process;GO:0043170,macromolecule metabolic process;GO:0055065,metal ion homeostasis;GO:0009987,cellular process;GO:0007166,cell surface receptor linked signal transduction;GO:0032501,multicellular orga…	GO:0005739,mitochondrion;GO:0016020,membrane;GO:0044421,extracellular region part;GO:0005783,endoplasmic reticulum;GO:0005622,intracellular;GO:0005829,cytosol;GO:0070161,anchoring junction;GO:0043227,membrane-bounded organelle;GO:0031988,membrane-bounded vesicle;GO:0005924,cell-substrate adherens junction;GO:0044464,cell part;GO:0005737,cytoplasm;GO:0005925,focal adhesion;GO:0044425,membrane part…	GO:0016740,transferase activity;GO:0016746,transferase activity, transferring acyl groups;GO:0003824,catalytic activity;GO:0016769,transferase activity, transferring nitrogenous groups;GO:0008483,transaminase activity;GO:0043167,ion binding;GO:0005515,protein binding;GO:0005488,binding;GO:0046872,metal ion binding;GO:0043169,cation binding	ko05016,Huntington's disease
207	sp|P17987|TCPA_HUMAN	T-complex protein 1 subunit alpha OS=Homo sapiens OX=9606 GN=TCP1 PE=1 SV=1		up	1	1.90708	0.00145233	multicellular organismal process;reproductive process;multi-organism process;localization;cellular process;biological regulation;cellular component organization or biogenesis;reproduction;regulation of biological process;metabolic process;death;positive regulation of biological process;establishment of localization	macromolecular complex;cell;extracellular region;organelle;cell part;extracellular region part;membrane-enclosed lumen;organelle part	binding	Posttranslational modification, protein turnover, chaperones ;		GO:0051347,positive regulation of transferase activity;GO:0009893,positive regulation of metabolic process;GO:0032846,positive regulation of homeostatic process;GO:0031326,regulation of cellular biosynthetic process;GO:0019538,protein metabolic process;GO:0051173,positive regulation of nitrogen compound metabolic process;GO:0009987,cellular process;GO:0070271,protein complex biogenesis;GO:0065003…	GO:0043229,intracellular organelle;GO:0016023,cytoplasmic membrane-bounded vesicle;GO:0043228,non-membrane-bounded organelle;GO:0005634,nucleus;GO:0070062,extracellular vesicular exosome;GO:0043232,intracellular non-membrane-bounded organelle;GO:0005576,extracellular region;GO:0044459,plasma membrane part;GO:0044450,microtubule organizing center part;GO:0043231,intracellular membrane-bounded orga…	GO:0019899,enzyme binding;GO:0005515,protein binding;GO:0005488,binding;GO:0000166,nucleotide binding;GO:0030554,adenyl nucleotide binding;GO:0001883,purine nucleoside binding;GO:0031625,ubiquitin protein ligase binding;GO:0001882,nucleoside binding;GO:0032559,adenyl ribonucleotide binding;GO:0032555,purine ribonucleotide binding;GO:0032553,ribonucleotide binding;GO:0005524,ATP binding;GO:0051082…
212	sp|P06744|G6PI_HUMAN	Glucose-6-phosphate isomerase OS=Homo sapiens OX=9606 GN=GPI PE=1 SV=4		up	1	1.84586	0.011285	cellular process;multicellular organismal process;negative regulation of biological process;death;developmental process;metabolic process;regulation of biological process;response to stimulus;biological regulation;immune system process	extracellular region part;organelle part;cell part;organelle;membrane-enclosed lumen;cell;extracellular region	catalytic activity;binding	Carbohydrate transport and metabolism ;	Starch and sucrose metabolism;Microbial metabolism in diverse environments;Pentose phosphate pathway;Amino sugar and nucleotide sugar metabolism;Metabolic pathways;Glycolysis / Gluconeogenesis	GO:0009887,organ morphogenesis;GO:0006351,transcription, DNA-dependent;GO:0043154,negative regulation of caspase activity;GO:0050793,regulation of developmental process;GO:0006006,glucose metabolic process;GO:0043281,regulation of caspase activity;GO:0065009,regulation of molecular function;GO:0006366,transcription from RNA polymerase II promoter;GO:0006082,organic acid metabolic process;GO:00508…	GO:0065010,extracellular membrane-bounded organelle;GO:0042995,cell projection;GO:0043231,intracellular membrane-bounded organelle;GO:0005576,extracellular region;GO:0070062,extracellular vesicular exosome;GO:0005634,nucleus;GO:0043229,intracellular organelle;GO:0005623,cell;GO:0005886,plasma membrane;GO:0043233,organelle lumen;GO:0043230,extracellular organelle;GO:0044428,nuclear part;GO:0044444…	GO:0005488,binding;GO:0019899,enzyme binding;GO:0005515,protein binding;GO:0005102,receptor binding;GO:0016860,intramolecular oxidoreductase activity;GO:0048029,monosaccharide binding;GO:0005529,sugar binding;GO:0031625,ubiquitin protein ligase binding;GO:0030246,carbohydrate binding;GO:0016861,intramolecular oxidoreductase activity, interconverting aldoses and ketoses;GO:0016866,intramolecular t…	ko00520,Amino sugar and nucleotide sugar metabolism;ko00010,Glycolysis / Gluconeogenesis;ko00500,Starch and sucrose metabolism;ko01100,Metabolic pathways;ko01120,Microbial metabolism in diverse environments;ko00030,Pentose phosphate pathway
214	sp|P15311|EZRI_HUMAN	Ezrin OS=Homo sapiens OX=9606 GN=EZR PE=1 SV=4		up	1	1.39171	0.0475842	response to stimulus;immune system process;establishment of localization;positive regulation of biological process;locomotion;cellular process;biological regulation;regulation of biological process;growth;cellular component organization or biogenesis;developmental process;metabolic process;biological adhesion;signaling;multicellular organismal process;negative regulation of biological process;loc…	organelle;extracellular region part;cell part;cell;extracellular region;macromolecular complex;membrane-enclosed lumen;organelle part	binding		Regulation of actin cytoskeleton;Pathogenic Escherichia coli infection;Leukocyte transendothelial migration;Gastric acid secretion	GO:0043408,regulation of MAPKKK cascade;GO:0007016,cytoskeletal anchoring at plasma membrane;GO:0031326,regulation of cellular biosynthetic process;GO:0009893,positive regulation of metabolic process;GO:0009987,cellular process;GO:0032990,cell part morphogenesis;GO:0022603,regulation of anatomical structure morphogenesis;GO:0022403,cell cycle phase;GO:0031324,negative regulation of cellular metab…	GO:0044464,cell part;GO:0044446,intracellular organelle part;GO:0070013,intracellular organelle lumen;GO:0031253,cell projection membrane;GO:0005737,cytoplasm;GO:0005925,focal adhesion;GO:0044425,membrane part;GO:0048471,perinuclear region of cytoplasm;GO:0005730,nucleolus;GO:0043227,membrane-bounded organelle;GO:0005938,cell cortex;GO:0005924,cell-substrate adherens junction;GO:0031988,membrane-…	GO:0051117,ATPase binding;GO:0019901,protein kinase binding;GO:0019904,protein domain specific binding;GO:0019900,kinase binding;GO:0050839,cell adhesion molecule binding;GO:0005488,binding;GO:0019899,enzyme binding;GO:0005515,protein binding;GO:0051015,actin filament binding;GO:0003779,actin binding;GO:0015631,tubulin binding;GO:0008017,microtubule binding;GO:0008092,cytoskeletal protein binding	ko04810,Regulation of actin cytoskeleton;ko04971,Gastric acid secretion;ko04670,Leukocyte transendothelial migration;ko05130,Pathogenic Escherichia coli infection
217	sp|P51659|DHB4_HUMAN	Peroxisomal multifunctional enzyme type 2 OS=Homo sapiens OX=9606 GN=HSD17B4 PE=1 SV=3		down	1	0.64676	0.000112481	reproduction;biological regulation;multicellular organismal process;reproductive process;cellular process;developmental process;metabolic process	cell;membrane-enclosed lumen;organelle;organelle part;cell part	binding;catalytic activity	Lipid transport and metabolism ;Lipid transport and metabolism ; Secondary metabolites biosynthesis, transport and catabolism ; General function prediction only ;	Metabolic pathways;Primary bile acid biosynthesis;Peroxisome	GO:0008202,steroid metabolic process;GO:0032502,developmental process;GO:0030258,lipid modification;GO:0043436,oxoacid metabolic process;GO:0016053,organic acid biosynthetic process;GO:0003006,reproductive developmental process;GO:0009062,fatty acid catabolic process;GO:0019752,carboxylic acid metabolic process;GO:0044242,cellular lipid catabolic process;GO:0044248,cellular catabolic process;GO:0…	GO:0043227,membrane-bounded organelle;GO:0043231,intracellular membrane-bounded organelle;GO:0031907,microbody lumen;GO:0031903,microbody membrane;GO:0005778,peroxisomal membrane;GO:0005777,peroxisome;GO:0005737,cytoplasm;GO:0043229,intracellular organelle;GO:0044424,intracellular part;GO:0043226,organelle;GO:0044464,cell part;GO:0005782,peroxisomal matrix;GO:0070013,intracellular organelle lumen…	GO:0042803,protein homodimerization activity;GO:0016853,isomerase activity;GO:0046983,protein dimerization activity;GO:0003824,catalytic activity;GO:0042802,identical protein binding;GO:0016508,long-chain-enoyl-CoA hydratase activity;GO:0016835,carbon-oxygen lyase activity;GO:0016616,oxidoreductase activity, acting on the CH-OH group of donors, NAD or NADP as acceptor;GO:0016614,oxidoreductase ac…	ko01100,Metabolic pathways;ko04146,Peroxisome;ko00120,Primary bile acid biosynthesis
218	sp|P12268|IMDH2_HUMAN	Inosine-5'-monophosphate dehydrogenase 2 OS=Homo sapiens OX=9606 GN=IMPDH2 PE=1 SV=2		up	1	1.77428	0.00457931	cellular process;cell proliferation;multicellular organismal process;metabolic process;developmental process;cellular component organization or biogenesis;immune system process;response to stimulus	cell;extracellular region;organelle;organelle part;extracellular region part;cell part	catalytic activity;binding	Nucleotide transport and metabolism ;	Drug metabolism - other enzymes;Metabolic pathways;Purine metabolism	GO:0044085,cellular component biogenesis;GO:0009259,ribonucleotide metabolic process;GO:0009167,purine ribonucleoside monophosphate metabolic process;GO:0006807,nitrogen compound metabolic process;GO:0051262,protein tetramerization;GO:0046128,purine ribonucleoside metabolic process;GO:0001775,cell activation;GO:0044238,primary metabolic process;GO:0008152,metabolic process;GO:0070661,leukocyte pr…	GO:0044439,peroxisomal part;GO:0043230,extracellular organelle;GO:0005623,cell;GO:0042579,microbody;GO:0031090,organelle membrane;GO:0044422,organelle part;GO:0031982,vesicle;GO:0016020,membrane;GO:0044421,extracellular region part;GO:0044444,cytoplasmic part;GO:0005622,intracellular;GO:0043231,intracellular membrane-bounded organelle;GO:0043227,membrane-bounded organelle;GO:0065010,extracellular…	GO:0003676,nucleic acid binding;GO:0016616,oxidoreductase activity, acting on the CH-OH group of donors, NAD or NADP as acceptor;GO:0043167,ion binding;GO:0003723,RNA binding;GO:0005515,protein binding;GO:0003677,DNA binding;GO:0016614,oxidoreductase activity, acting on CH-OH group of donors;GO:0005488,binding;GO:0046872,metal ion binding;GO:0016491,oxidoreductase activity;GO:0043169,cation bindi…	ko00230,Purine metabolism;ko00983,Drug metabolism - other enzymes;ko01100,Metabolic pathways
220	sp|Q13263|TIF1B_HUMAN	Transcription intermediary factor 1-beta OS=Homo sapiens OX=9606 GN=TRIM28 PE=1 SV=5		down	1	0.410317	0.00112795	reproductive process;multi-organism process;multicellular organismal process;negative regulation of biological process;localization;biological regulation;growth;reproduction;regulation of biological process;cellular component organization or biogenesis;developmental process;metabolic process;cellular process;response to stimulus;immune system process;positive regulation of biological process;esta…	cell part;organelle part;membrane-enclosed lumen;organelle;cell	nucleic acid binding transcription factor activity;catalytic activity;binding;protein binding transcription factor activity			GO:0045449,regulation of transcription;GO:0048468,cell development;GO:0010558,negative regulation of macromolecule biosynthetic process;GO:0044238,primary metabolic process;GO:0046777,protein amino acid autophosphorylation;GO:0051253,negative regulation of RNA metabolic process;GO:0044085,cellular component biogenesis;GO:0060485,mesenchyme development;GO:0080135,regulation of cellular response to…	GO:0005622,intracellular;GO:0031974,membrane-enclosed lumen;GO:0044428,nuclear part;GO:0031981,nuclear lumen;GO:0005720,nuclear heterochromatin;GO:0044422,organelle part;GO:0044454,nuclear chromosome part;GO:0005694,chromosome;GO:0000792,heterochromatin;GO:0005623,cell;GO:0000790,nuclear chromatin;GO:0043233,organelle lumen;GO:0044464,cell part;GO:0000791,euchromatin;GO:0043232,intracellular non-…	GO:0008270,zinc ion binding;GO:0003712,transcription cofactor activity;GO:0016874,ligase activity;GO:0016301,kinase activity;GO:0016879,ligase activity, forming carbon-nitrogen bonds;GO:0008134,transcription factor binding;GO:0004672,protein kinase activity;GO:0004842,ubiquitin-protein ligase activity;GO:0046914,transition metal ion binding;GO:0031625,ubiquitin protein ligase binding;GO:0019904,p…
223	sp|Q06210|GFPT1_HUMAN	Glutamine--fructose-6-phosphate aminotransferase [isomerizing] 1 OS=Homo sapiens OX=9606 GN=GFPT1 PE=1 SV=3		up	1	1.32166	0.0248199	metabolic process;biological regulation;response to stimulus;rhythmic process;cellular component organization or biogenesis;regulation of biological process;cellular process;negative regulation of biological process	cell;extracellular region;cell part;extracellular region part;organelle	binding;catalytic activity	Cell wall/membrane/envelope biogenesis ;	Alanine, aspartate and glutamate metabolism;Amino sugar and nucleotide sugar metabolism;Metabolic pathways	GO:0010556,regulation of macromolecule biosynthetic process;GO:0006048,UDP-N-acetylglucosamine biosynthetic process;GO:0010558,negative regulation of macromolecule biosynthetic process;GO:0044238,primary metabolic process;GO:0034960,cellular biopolymer metabolic process;GO:0032868,response to insulin stimulus;GO:0051262,protein tetramerization;GO:0018279,protein amino acid N-linked glycosylation …	GO:0070062,extracellular vesicular exosome;GO:0043226,organelle;GO:0044424,intracellular part;GO:0005737,cytoplasm;GO:0044464,cell part;GO:0005576,extracellular region;GO:0065010,extracellular membrane-bounded organelle;GO:0031988,membrane-bounded vesicle;GO:0043227,membrane-bounded organelle;GO:0005829,cytosol;GO:0031982,vesicle;GO:0044444,cytoplasmic part;GO:0005622,intracellular;GO:0044421,ext…	GO:0030246,carbohydrate binding;GO:0005488,binding;GO:0043176,amine binding;GO:0016597,amino acid binding;GO:0016740,transferase activity;GO:0031406,carboxylic acid binding;GO:0003824,catalytic activity;GO:0016769,transferase activity, transferring nitrogenous groups;GO:0008483,transaminase activity	ko00520,Amino sugar and nucleotide sugar metabolism;ko00250,Alanine, aspartate and glutamate metabolism;ko01100,Metabolic pathways
226	sp|O00567|NOP56_HUMAN	Nucleolar protein 56 OS=Homo sapiens OX=9606 GN=NOP56 PE=1 SV=4		up	1	1.6873	0.00100113	metabolic process;cellular process;cellular component organization or biogenesis	organelle;membrane-enclosed lumen;cell part;organelle part;macromolecular complex;cell	binding	Translation, ribosomal structure and biogenesis ;	Spliceosome	GO:0008152,metabolic process;GO:0042254,ribosome biogenesis;GO:0044237,cellular metabolic process;GO:0006364,rRNA processing;GO:0034660,ncRNA metabolic process;GO:0016070,RNA metabolic process;GO:0009987,cellular process;GO:0016072,rRNA metabolic process;GO:0043170,macromolecule metabolic process;GO:0043283,biopolymer metabolic process;GO:0044085,cellular component biogenesis;GO:0006139,nucleobas…	GO:0005623,cell;GO:0043233,organelle lumen;GO:0030529,ribonucleoprotein complex;GO:0044422,organelle part;GO:0031981,nuclear lumen;GO:0031974,membrane-enclosed lumen;GO:0044428,nuclear part;GO:0005622,intracellular;GO:0016020,membrane;GO:0031428,box C/D snoRNP complex;GO:0043231,intracellular membrane-bounded organelle;GO:0005732,small nucleolar ribonucleoprotein complex;GO:0043227,membrane-bound…	GO:0005488,binding;GO:0003676,nucleic acid binding;GO:0030515,snoRNA binding;GO:0003723,RNA binding	ko03040,Spliceosome
229	sp|Q63HN8|RN213_HUMAN	E3 ubiquitin-protein ligase RNF213 OS=Homo sapiens OX=9606 GN=RNF213 PE=1 SV=3		down	1	0.699145	0.000592224
234	sp|P0DMV9|HS71B_HUMAN	Heat shock 70 kDa protein 1B OS=Homo sapiens OX=9606 GN=HSPA1B PE=1 SV=1	sp|P0DMV8|HS71A_HUMAN	down	1	0.804391	0.0132083	immune system process;response to stimulus;positive regulation of biological process;locomotion;cellular process;biological regulation;viral reproduction;regulation of biological process;reproduction;cellular component organization or biogenesis;metabolic process;negative regulation of biological process;multicellular organismal process;signaling;reproductive process;multi-organism process	extracellular region;cell;macromolecular complex;extracellular region part;cell part;organelle;organelle part;membrane-enclosed lumen	binding;catalytic activity;molecular transducer activity	Posttranslational modification, protein turnover, chaperones ;	Protein processing in endoplasmic reticulum;Spliceosome;Antigen processing and presentation;Prion diseases;MAPK signaling pathway;Toxoplasmosis;Endocytosis	GO:0034605,cellular response to heat;GO:0009144,purine nucleoside triphosphate metabolic process;GO:0009987,cellular process;GO:0043170,macromolecule metabolic process;GO:0031326,regulation of cellular biosynthetic process;GO:0042221,response to chemical stimulus;GO:0019538,protein metabolic process;GO:0051240,positive regulation of multicellular organismal process;GO:0044267,cellular protein met…	GO:0044428,nuclear part;GO:0044444,cytoplasmic part;GO:0030054,cell junction;GO:0005814,centriole;GO:0043233,organelle lumen;GO:0005623,cell;GO:0005886,plasma membrane;GO:0016323,basolateral plasma membrane;GO:0043232,intracellular non-membrane-bounded organelle;GO:0044459,plasma membrane part;GO:0043229,intracellular organelle;GO:0005912,adherens junction;GO:0005634,nucleus;GO:0043228,non-membra…	GO:0003824,catalytic activity;GO:0016817,hydrolase activity, acting on acid anhydrides;GO:0016787,hydrolase activity;GO:0060089,molecular transducer activity;GO:0001618,viral receptor activity;GO:0051082,unfolded protein binding;GO:0032555,purine ribonucleotide binding;GO:0004871,signal transducer activity;GO:0001882,nucleoside binding;GO:0030554,adenyl nucleotide binding;GO:0005488,binding;GO:00…	ko05020,Prion diseases;ko04010,MAPK signaling pathway;ko03040,Spliceosome;ko04144,Endocytosis;ko05145,Toxoplasmosis;ko04141,Protein processing in endoplasmic reticulum;ko04612,Antigen processing and presentation
235	sp|P07900|HS90A_HUMAN	Heat shock protein HSP 90-alpha OS=Homo sapiens OX=9606 GN=HSP90AA1 PE=1 SV=5		up	1	1.57631	0.00650501	establishment of localization;positive regulation of biological process;developmental process;metabolic process;response to stimulus;biological regulation;immune system process;cellular component organization or biogenesis;regulation of biological process;cellular process;signaling;locomotion;multicellular organismal process;localization	organelle;membrane-enclosed lumen;organelle part;cell part;extracellular region part;extracellular region;cell	enzyme regulator activity;catalytic activity;binding	Posttranslational modification, protein turnover, chaperones ;	Pathways in cancer;NOD-like receptor signaling pathway;Prostate cancer;Progesterone-mediated oocyte maturation;Antigen processing and presentation;Protein processing in endoplasmic reticulum	GO:0051246,regulation of protein metabolic process;GO:0007409,axonogenesis;GO:0048812,neuron projection morphogenesis;GO:0044237,cellular metabolic process;GO:0051171,regulation of nitrogen compound metabolic process;GO:0019222,regulation of metabolic process;GO:0031396,regulation of protein ubiquitination;GO:0030182,neuron differentiation;GO:0048858,cell projection morphogenesis;GO:0006950,respo…	GO:0048770,pigment granule;GO:0044421,extracellular region part;GO:0016020,membrane;GO:0005622,intracellular;GO:0031974,membrane-enclosed lumen;GO:0031981,nuclear lumen;GO:0005773,vacuole;GO:0044422,organelle part;GO:0005654,nucleoplasm;GO:0031252,cell leading edge;GO:0005829,cytosol;GO:0044437,vacuolar part;GO:0043227,membrane-bounded organelle;GO:0031410,cytoplasmic vesicle;GO:0031988,membrane-…	GO:0005524,ATP binding;GO:0017111,nucleoside-triphosphatase activity;GO:0032553,ribonucleotide binding;GO:0042802,identical protein binding;GO:0042826,histone deacetylase binding;GO:0016462,pyrophosphatase activity;GO:0017076,purine nucleotide binding;GO:0046983,protein dimerization activity;GO:0016887,ATPase activity;GO:0042803,protein homodimerization activity;GO:0016818,hydrolase activity, act…	ko04914,Progesterone-mediated oocyte maturation;ko04621,NOD-like receptor signaling pathway;ko05200,Pathways in cancer;ko04141,Protein processing in endoplasmic reticulum;ko04612,Antigen processing and presentation;ko05215,Prostate cancer
236	sp|O95786|DDX58_HUMAN	Antiviral innate immune response receptor RIG-I OS=Homo sapiens OX=9606 GN=DDX58 PE=1 SV=2		down	1	0.488994	2.41914e-06	immune system process;biological regulation;viral reproduction;response to stimulus;regulation of biological process;metabolic process;establishment of localization;positive regulation of biological process;negative regulation of biological process;multicellular organismal process;locomotion;multi-organism process;localization;cellular process	cell part;organelle;cell	binding;catalytic activity	Replication, recombination and repair ;	RIG-I-like receptor signaling pathway;Cytosolic DNA-sensing pathway;Hepatitis C	GO:0048518,positive regulation of biological process;GO:0050789,regulation of biological process;GO:0050691,regulation of defense response to virus by host;GO:0009607,response to biotic stimulus;GO:0032647,regulation of interferon-alpha production;GO:0019219,regulation of nucleobase, nucleoside, nucleotide and nucleic acid metabolic process;GO:0009581,detection of external stimulus;GO:0065007,bio…	GO:0005923,tight junction;GO:0001726,ruffle;GO:0044459,plasma membrane part;GO:0015629,actin cytoskeleton;GO:0043232,intracellular non-membrane-bounded organelle;GO:0044464,cell part;GO:0043226,organelle;GO:0043228,non-membrane-bounded organelle;GO:0044424,intracellular part;GO:0044425,membrane part;GO:0043229,intracellular organelle;GO:0070160,occluding junction;GO:0031253,cell projection membra…	GO:0043167,ion binding;GO:0001882,nucleoside binding;GO:0003676,nucleic acid binding;GO:0030554,adenyl nucleotide binding;GO:0003725,double-stranded RNA binding;GO:0046872,metal ion binding;GO:0043566,structure-specific DNA binding;GO:0005515,protein binding;GO:0005488,binding;GO:0003824,catalytic activity;GO:0016817,hydrolase activity, acting on acid anhydrides;GO:0004386,helicase activity;GO:00…	ko05160,Hepatitis C;ko04623,Cytosolic DNA-sensing pathway;ko04622,RIG-I-like receptor signaling pathway
238	sp|O60271|JIP4_HUMAN	C-Jun-amino-terminal kinase-interacting protein 4 OS=Homo sapiens OX=9606 GN=SPAG9 PE=1 SV=4		up	1	1.27498	0.00389011	establishment of localization;positive regulation of biological process;developmental process;metabolic process;response to stimulus;biological regulation;reproduction;regulation of biological process;cellular component organization or biogenesis;cellular process;signaling;locomotion;reproductive process;multicellular organismal process;localization	extracellular region;cell;organelle;cell part;organelle part;extracellular region part	structural molecule activity;binding		MAPK signaling pathway	GO:0007275,multicellular organismal development;GO:0044267,cellular protein metabolic process;GO:0007276,gamete generation;GO:0060284,regulation of cell development;GO:0042692,muscle cell differentiation;GO:0050767,regulation of neurogenesis;GO:0051174,regulation of phosphorus metabolic process;GO:0006464,protein modification process;GO:0043408,regulation of MAPKKK cascade;GO:0051347,positive reg…	GO:0043230,extracellular organelle;GO:0005623,cell;GO:0001669,acrosomal vesicle;GO:0044444,cytoplasmic part;GO:0031982,vesicle;GO:0030141,secretory granule;GO:0016021,integral to membrane;GO:0005856,cytoskeleton;GO:0043231,intracellular membrane-bounded organelle;GO:0065010,extracellular membrane-bounded organelle;GO:0043232,intracellular non-membrane-bounded organelle;GO:0005576,extracellular re…	GO:0048273,mitogen-activated protein kinase p38 binding;GO:0005198,structural molecule activity;GO:0019901,protein kinase binding;GO:0019894,kinesin binding;GO:0005515,protein binding;GO:0019899,enzyme binding;GO:0005488,binding;GO:0051019,mitogen-activated protein kinase binding;GO:0019900,kinase binding;GO:0032947,protein complex scaffold;GO:0008092,cytoskeletal protein binding	ko04010,MAPK signaling pathway
242	sp|P48444|COPD_HUMAN	Coatomer subunit delta OS=Homo sapiens OX=9606 GN=ARCN1 PE=1 SV=1		up	1	1.25222	0.010278	establishment of localization;developmental process;metabolic process;cellular component organization or biogenesis;response to stimulus;cellular process;pigmentation;localization;multicellular organismal process	organelle part;cell part;organelle;macromolecular complex;cell	binding			GO:0010926,anatomical structure formation;GO:0032502,developmental process;GO:0051648,vesicle localization;GO:0018196,peptidyl-asparagine modification;GO:0050896,response to stimulus;GO:0007417,central nervous system development;GO:0006891,intra-Golgi vesicle-mediated transport;GO:0048513,organ development;GO:0006487,protein amino acid N-linked glycosylation;GO:0044260,cellular macromolecule meta…	GO:0030659,cytoplasmic vesicle membrane;GO:0030663,COPI coated vesicle membrane;GO:0005623,cell;GO:0012506,vesicle membrane;GO:0012505,endomembrane system;GO:0005794,Golgi apparatus;GO:0044444,cytoplasmic part;GO:0030120,vesicle coat;GO:0031090,organelle membrane;GO:0030117,membrane coat;GO:0031982,vesicle;GO:0043231,intracellular membrane-bounded organelle;GO:0030662,coated vesicle membrane;GO:0…	GO:0005488,binding;GO:0005515,protein binding
245	sp|Q12797|ASPH_HUMAN	Aspartyl/asparaginyl beta-hydroxylase OS=Homo sapiens OX=9606 GN=ASPH PE=1 SV=3		down	1	0.619326	0.000372066	establishment of localization;positive regulation of biological process;developmental process;metabolic process;regulation of biological process;response to stimulus;biological regulation;cellular process;localization;cell proliferation;signaling;negative regulation of biological process;multicellular organismal process	organelle;membrane-enclosed lumen;organelle part;cell part;macromolecular complex;cell	binding;structural molecule activity;catalytic activity;electron carrier activity	Posttranslational modification, protein turnover, chaperones ;		GO:0010468,regulation of gene expression;GO:0044093,positive regulation of molecular function;GO:0010628,positive regulation of gene expression;GO:0032502,developmental process;GO:0031325,positive regulation of cellular metabolic process;GO:0048522,positive regulation of cellular process;GO:0051924,regulation of calcium ion transport;GO:0050896,response to stimulus;GO:0045941,positive regulation …	GO:0016020,membrane;GO:0005783,endoplasmic reticulum;GO:0031974,membrane-enclosed lumen;GO:0005622,intracellular;GO:0044432,endoplasmic reticulum part;GO:0031227,intrinsic to endoplasmic reticulum membrane;GO:0044422,organelle part;GO:0043234,protein complex;GO:0016529,sarcoplasmic reticulum;GO:0042175,nuclear envelope-endoplasmic reticulum network;GO:0032991,macromolecular complex;GO:0043227,mem…	GO:0003824,catalytic activity;GO:0009055,electron carrier activity;GO:0008307,structural constituent of muscle;GO:0016705,oxidoreductase activity, acting on paired donors, with incorporation or reduction of molecular oxygen;GO:0043167,ion binding;GO:0005198,structural molecule activity;GO:0043169,cation binding;GO:0005509,calcium ion binding;GO:0016491,oxidoreductase activity;GO:0016706,oxidoredu…
247	sp|P35221|CTNA1_HUMAN	Catenin alpha-1 OS=Homo sapiens OX=9606 GN=CTNNA1 PE=1 SV=1		down	1	0.70692	0.00742134	cellular process;cell proliferation;locomotion;positive regulation of biological process;response to stimulus;localization;reproductive process;signaling;negative regulation of biological process;multicellular organismal process;biological adhesion;developmental process;reproduction;regulation of biological process;cellular component organization or biogenesis;rhythmic process;biological regulati…	cell part;organelle;cell;macromolecular complex	binding;structural molecule activity		Tight junction;Bacterial invasion of epithelial cells;Adherens junction;Leukocyte transendothelial migration;Endometrial cancer;Arrhythmogenic right ventricular cardiomyopathy (ARVC);Pathways in cancer	GO:0042127,regulation of cell proliferation;GO:0060284,regulation of cell development;GO:0007275,multicellular organismal development;GO:0007548,sex differentiation;GO:0050767,regulation of neurogenesis;GO:0008406,gonad development;GO:0042221,response to chemical stimulus;GO:0008285,negative regulation of cell proliferation;GO:0051641,cellular localization;GO:0010033,response to organic substance…	GO:0030027,lamellipodium;GO:0043296,apical junction complex;GO:0045121,membrane raft;GO:0043234,protein complex;GO:0014704,intercalated disc;GO:0016020,membrane;GO:0005622,intracellular;GO:0016327,apicolateral plasma membrane;GO:0043227,membrane-bounded organelle;GO:0031988,membrane-bounded vesicle;GO:0016342,catenin complex;GO:0005924,cell-substrate adherens junction;GO:0031410,cytoplasmic vesic…	GO:0050839,cell adhesion molecule binding;GO:0005488,binding;GO:0008013,beta-catenin binding;GO:0005515,protein binding;GO:0005198,structural molecule activity;GO:0008092,cytoskeletal protein binding;GO:0045296,cadherin binding;GO:0003779,actin binding;GO:0051015,actin filament binding	ko04530,Tight junction;ko05100,Bacterial invasion of epithelial cells;ko04670,Leukocyte transendothelial migration;ko05200,Pathways in cancer;ko05412,Arrhythmogenic right ventricular cardiomyopathy (ARVC);ko05213,Endometrial cancer;ko04520,Adherens junction
252	sp|Q8NE71|ABCF1_HUMAN	ATP-binding cassette sub-family F member 1 OS=Homo sapiens OX=9606 GN=ABCF1 PE=1 SV=2		up	1	1.23399	0.0238402	cellular process;localization;metabolic process;positive regulation of biological process;establishment of localization;biological regulation;response to stimulus;regulation of biological process;cellular component organization or biogenesis	cell part;organelle part;membrane-enclosed lumen;organelle;cell;macromolecular complex	catalytic activity;binding;translation regulator activity	General function prediction only ;		GO:0006412,translation;GO:0010468,regulation of gene expression;GO:0022613,ribonucleoprotein complex biogenesis;GO:0010557,positive regulation of macromolecule biosynthetic process;GO:0006950,response to stress;GO:0031325,positive regulation of cellular metabolic process;GO:0009605,response to external stimulus;GO:0048522,positive regulation of cellular process;GO:0050896,response to stimulus;GO:…	GO:0032991,macromolecular complex;GO:0005829,cytosol;GO:0005654,nucleoplasm;GO:0031967,organelle envelope;GO:0005635,nuclear envelope;GO:0043227,membrane-bounded organelle;GO:0005840,ribosome;GO:0031975,envelope;GO:0044446,intracellular organelle part;GO:0070013,intracellular organelle lumen;GO:0044464,cell part;GO:0043226,organelle;GO:0044424,intracellular part;GO:0005737,cytoplasm;GO:0005844,po…	GO:0008494,translation activator activity;GO:0032559,adenyl ribonucleotide binding;GO:0000166,nucleotide binding;GO:0001883,purine nucleoside binding;GO:0045182,translation regulator activity;GO:0016887,ATPase activity;GO:0016818,hydrolase activity, acting on acid anhydrides, in phosphorus-containing anhydrides;GO:0017076,purine nucleotide binding;GO:0016462,pyrophosphatase activity;GO:0043022,ri…
256	sp|P28838|AMPL_HUMAN	Cytosol aminopeptidase OS=Homo sapiens OX=9606 GN=LAP3 PE=1 SV=3		down	1	0.608942	0.00039448	metabolic process	extracellular region;cell;organelle;membrane-enclosed lumen;cell part;organelle part;extracellular region part	binding;catalytic activity	Amino acid transport and metabolism ;	Arginine and proline metabolism;Glutathione metabolism;Metabolic pathways	GO:0009056,catabolic process;GO:0043170,macromolecule metabolic process;GO:0019538,protein metabolic process;GO:0044238,primary metabolic process;GO:0043285,biopolymer catabolic process;GO:0043283,biopolymer metabolic process;GO:0009057,macromolecule catabolic process;GO:0006508,proteolysis;GO:0008152,metabolic process;GO:0030163,protein catabolic process	GO:0043229,intracellular organelle;GO:0070062,extracellular vesicular exosome;GO:0005912,adherens junction;GO:0005634,nucleus;GO:0005576,extracellular region;GO:0044459,plasma membrane part;GO:0043231,intracellular membrane-bounded organelle;GO:0065010,extracellular membrane-bounded organelle;GO:0030055,cell-substrate junction;GO:0030054,cell junction;GO:0031982,vesicle;GO:0005794,Golgi apparatus…	GO:0070011,peptidase activity, acting on L-amino acid peptides;GO:0005488,binding;GO:0004177,aminopeptidase activity;GO:0046872,metal ion binding;GO:0008233,peptidase activity;GO:0043169,cation binding;GO:0008238,exopeptidase activity;GO:0046914,transition metal ion binding;GO:0043167,ion binding;GO:0008237,metallopeptidase activity;GO:0008235,metalloexopeptidase activity;GO:0016787,hydrolase act…	ko00330,Arginine and proline metabolism;ko00480,Glutathione metabolism;ko01100,Metabolic pathways
261	sp|P06396|GELS_HUMAN	Gelsolin OS=Homo sapiens OX=9606 GN=GSN PE=1 SV=1		up	1	1.24364	0.0240488	reproductive process;signaling;multi-organism process;multicellular organismal process;negative regulation of biological process;localization;viral reproduction;biological regulation;reproduction;cellular component organization or biogenesis;regulation of biological process;growth;metabolic process;death;developmental process;locomotion;cellular process;response to stimulus;positive regulation of…	cell;extracellular region;macromolecular complex;extracellular region part;organelle part;cell part;organelle	binding		Fc gamma R-mediated phagocytosis;Regulation of actin cytoskeleton	GO:0065007,biological regulation;GO:0032989,cellular component morphogenesis;GO:0051248,negative regulation of protein metabolic process;GO:0051495,positive regulation of cytoskeleton organization;GO:0006810,transport;GO:0048518,positive regulation of biological process;GO:0048015,phosphoinositide-mediated signaling;GO:0065008,regulation of biological quality;GO:0030029,actin filament-based proce…	GO:0044444,cytoplasmic part;GO:0030863,cortical cytoskeleton;GO:0030054,cell junction;GO:0031982,vesicle;GO:0002102,podosome;GO:0005623,cell;GO:0043230,extracellular organelle;GO:0005886,plasma membrane;GO:0016323,basolateral plasma membrane;GO:0015629,actin cytoskeleton;GO:0043232,intracellular non-membrane-bounded organelle;GO:0005576,extracellular region;GO:0044459,plasma membrane part;GO:0043…	GO:0017022,myosin binding;GO:0043167,ion binding;GO:0019904,protein domain specific binding;GO:0043169,cation binding;GO:0005509,calcium ion binding;GO:0005488,binding;GO:0005515,protein binding;GO:0046872,metal ion binding;GO:0003779,actin binding;GO:0008092,cytoskeletal protein binding	ko04666,Fc gamma R-mediated phagocytosis;ko04810,Regulation of actin cytoskeleton
264	sp|P17812|PYRG1_HUMAN	CTP synthase 1 OS=Homo sapiens OX=9606 GN=CTPS1 PE=1 SV=2		up	1	1.46574	0.00227597	immune system process;response to stimulus;cell proliferation;metabolic process;cellular process	cell;cell part	binding;catalytic activity	Nucleotide transport and metabolism ;	Pyrimidine metabolism;Metabolic pathways	GO:0009064,glutamine family amino acid metabolic process;GO:0001775,cell activation;GO:0006082,organic acid metabolic process;GO:0044238,primary metabolic process;GO:0006807,nitrogen compound metabolic process;GO:0032943,mononuclear cell proliferation;GO:0009987,cellular process;GO:0006520,cellular amino acid metabolic process;GO:0042221,response to chemical stimulus;GO:0042180,cellular ketone me…	GO:0005623,cell;GO:0005829,cytosol;GO:0005622,intracellular;GO:0044444,cytoplasmic part;GO:0016020,membrane;GO:0044464,cell part;GO:0044424,intracellular part;GO:0005737,cytoplasm	GO:0005488,binding;GO:0001883,purine nucleoside binding;GO:0030554,adenyl nucleotide binding;GO:0000166,nucleotide binding;GO:0001882,nucleoside binding;GO:0032559,adenyl ribonucleotide binding;GO:0016879,ligase activity, forming carbon-nitrogen bonds;GO:0032555,purine ribonucleotide binding;GO:0032553,ribonucleotide binding;GO:0005524,ATP binding;GO:0016874,ligase activity;GO:0003824,catalytic a…	ko00240,Pyrimidine metabolism;ko01100,Metabolic pathways
265	sp|O75534|CSDE1_HUMAN	Cold shock domain-containing protein E1 OS=Homo sapiens OX=9606 GN=CSDE1 PE=1 SV=2		up	1	1.35173	0.00823598	reproduction;regulation of biological process;biological regulation;metabolic process;developmental process;multicellular organismal process;reproductive process;cellular process	macromolecular complex;cell;organelle part;cell part;organelle	binding		Purine metabolism;Metabolic pathways	GO:0048513,organ development;GO:0003006,reproductive developmental process;GO:0032502,developmental process;GO:0006355,regulation of transcription, DNA-dependent;GO:0010468,regulation of gene expression;GO:0051171,regulation of nitrogen compound metabolic process;GO:0019222,regulation of metabolic process;GO:0009889,regulation of biosynthetic process;GO:0045137,development of primary sexual chara…	GO:0005623,cell;GO:0005886,plasma membrane;GO:0005739,mitochondrion;GO:0016020,membrane;GO:0005794,Golgi apparatus;GO:0005622,intracellular;GO:0044444,cytoplasmic part;GO:0031090,organelle membrane;GO:0044422,organelle part;GO:0044429,mitochondrial part;GO:0031966,mitochondrial membrane;GO:0005743,mitochondrial inner membrane;GO:0043231,intracellular membrane-bounded organelle;GO:0043227,membrane…	GO:0003676,nucleic acid binding;GO:0005488,binding;GO:0003677,DNA binding;GO:0005515,protein binding	ko00230,Purine metabolism;ko01100,Metabolic pathways
268	sp|Q9UHB6|LIMA1_HUMAN	LIM domain and actin-binding protein 1 OS=Homo sapiens OX=9606 GN=LIMA1 PE=1 SV=1		up	1	1.52534	0.00248229	cellular process;regulation of biological process;cellular component organization or biogenesis;negative regulation of biological process;biological regulation	organelle;organelle part;cell part;cell	binding			GO:0016043,cellular component organization;GO:0051128,regulation of cellular component organization;GO:0048519,negative regulation of biological process;GO:0051246,regulation of protein metabolic process;GO:0051129,negative regulation of cellular component organization;GO:0043242,negative regulation of protein complex disassembly;GO:0048523,negative regulation of cellular process;GO:0019222,regul…	GO:0044459,plasma membrane part;GO:0032153,cell division site;GO:0043232,intracellular non-membrane-bounded organelle;GO:0015629,actin cytoskeleton;GO:0032155,cell division site part;GO:0043228,non-membrane-bounded organelle;GO:0005912,adherens junction;GO:0043229,intracellular organelle;GO:0030055,cell-substrate junction;GO:0005856,cytoskeleton;GO:0042995,cell projection;GO:0032432,actin filamen…	GO:0008092,cytoskeletal protein binding;GO:0003779,actin binding;GO:0051015,actin filament binding;GO:0008270,zinc ion binding;GO:0043169,cation binding;GO:0003785,actin monomer binding;GO:0005488,binding;GO:0005515,protein binding;GO:0046872,metal ion binding;GO:0043167,ion binding;GO:0046914,transition metal ion binding
277	sp|O75694|NU155_HUMAN	Nuclear pore complex protein Nup155 OS=Homo sapiens OX=9606 GN=NUP155 PE=1 SV=1		up	1	1.57729	0.00927659	localization;negative regulation of biological process;signaling;multi-organism process;reproductive process;cellular process;reproduction;regulation of biological process;cellular component organization or biogenesis;biological regulation;response to stimulus;viral reproduction;metabolic process;establishment of localization	macromolecular complex;cell;organelle part;cell part;organelle	transporter activity;binding;structural molecule activity	Intracellular trafficking, secretion, and vesicular transport ;	RNA transport	GO:0051701,interaction with host;GO:0044249,cellular biosynthetic process;GO:0034504,protein localization in nucleus;GO:0007077,mitotic nuclear envelope disassembly;GO:0070727,cellular macromolecule localization;GO:0044237,cellular metabolic process;GO:0019222,regulation of metabolic process;GO:0022415,viral reproductive process;GO:0032879,regulation of localization;GO:0034645,cellular macromolec…	GO:0005635,nuclear envelope;GO:0043231,intracellular membrane-bounded organelle;GO:0043227,membrane-bounded organelle;GO:0005643,nuclear pore;GO:0031967,organelle envelope;GO:0016021,integral to membrane;GO:0032991,macromolecular complex;GO:0031965,nuclear membrane;GO:0043229,intracellular organelle;GO:0044425,membrane part;GO:0031224,intrinsic to membrane;GO:0044424,intracellular part;GO:0005634…	GO:0005198,structural molecule activity;GO:0005215,transporter activity;GO:0005515,protein binding;GO:0005488,binding	ko03013,RNA transport
279	sp|P06756|ITAV_HUMAN	Integrin alpha-V OS=Homo sapiens OX=9606 GN=ITGAV PE=1 SV=2		down	1	0.594388	0.00102922	biological adhesion;developmental process;metabolic process;growth;reproduction;regulation of biological process;cellular component organization or biogenesis;biological regulation;viral reproduction;localization;negative regulation of biological process;multicellular organismal process;reproductive process;signaling;multi-organism process;establishment of localization;positive regulation of biol…	cell;extracellular region;macromolecular complex;extracellular region part;cell part;organelle	binding;molecular transducer activity;transporter activity		Small cell lung cancer;Arrhythmogenic right ventricular cardiomyopathy (ARVC);Phagosome;Pathways in cancer;Focal adhesion;Hypertrophic cardiomyopathy (HCM);Regulation of actin cytoskeleton;ECM-receptor interaction;Cell adhesion molecules (CAMs);Dilated cardiomyopathy	GO:0007275,multicellular organismal development;GO:0007166,cell surface receptor linked signal transduction;GO:0032501,multicellular organismal process;GO:0006816,calcium ion transport;GO:0040012,regulation of locomotion;GO:0042221,response to chemical stimulus;GO:0045596,negative regulation of cell differentiation;GO:0050793,regulation of developmental process;GO:0080090,regulation of primary me…	GO:0031982,vesicle;GO:0005887,integral to plasma membrane;GO:0030054,cell junction;GO:0005902,microvillus;GO:0043235,receptor complex;GO:0044444,cytoplasmic part;GO:0016323,basolateral plasma membrane;GO:0009986,cell surface;GO:0030175,filopodium;GO:0005623,cell;GO:0005886,plasma membrane;GO:0043230,extracellular organelle;GO:0032587,ruffle membrane;GO:0005912,adherens junction;GO:0070062,extrace…	GO:0019955,cytokine binding;GO:0019838,growth factor binding;GO:0001618,viral receptor activity;GO:0022836,gated channel activity;GO:0005245,voltage-gated calcium channel activity;GO:0005515,protein binding;GO:0005261,cation channel activity;GO:0015075,ion transmembrane transporter activity;GO:0004872,receptor activity;GO:0002020,protease binding;GO:0001846,opsonin binding;GO:0050431,transforming…	ko05410,Hypertrophic cardiomyopathy (HCM);ko05412,Arrhythmogenic right ventricular cardiomyopathy (ARVC);ko05222,Small cell lung cancer;ko04510,Focal adhesion;ko04810,Regulation of actin cytoskeleton;ko04512,ECM-receptor interaction;ko05200,Pathways in cancer;ko05414,Dilated cardiomyopathy;ko04145,Phagosome;ko04514,Cell adhesion molecules (CAMs)
280	sp|O15067|PUR4_HUMAN	Phosphoribosylformylglycinamidine synthase OS=Homo sapiens OX=9606 GN=PFAS PE=1 SV=4		up	1	1.25889	0.041836	cellular process;metabolic process;response to stimulus	extracellular region part;cell part;organelle;cell;extracellular region	catalytic activity;binding	Nucleotide transport and metabolism ;	Purine metabolism;Metabolic pathways	GO:0044238,primary metabolic process;GO:0046040,IMP metabolic process;GO:0006082,organic acid metabolic process;GO:0009064,glutamine family amino acid metabolic process;GO:0006189,'de novo' IMP biosynthetic process;GO:0006164,purine nucleotide biosynthetic process;GO:0009259,ribonucleotide metabolic process;GO:0009167,purine ribonucleoside monophosphate metabolic process;GO:0009127,purine nucleos…	GO:0044444,cytoplasmic part;GO:0005622,intracellular;GO:0044421,extracellular region part;GO:0031982,vesicle;GO:0005623,cell;GO:0043230,extracellular organelle;GO:0044464,cell part;GO:0005576,extracellular region;GO:0070062,extracellular vesicular exosome;GO:0044424,intracellular part;GO:0043226,organelle;GO:0005737,cytoplasm;GO:0005829,cytosol;GO:0031988,membrane-bounded vesicle;GO:0065010,extra…	GO:0046872,metal ion binding;GO:0005488,binding;GO:0030554,adenyl nucleotide binding;GO:0001882,nucleoside binding;GO:0043167,ion binding;GO:0032555,purine ribonucleotide binding;GO:0003824,catalytic activity;GO:0001883,purine nucleoside binding;GO:0000166,nucleotide binding;GO:0043169,cation binding;GO:0032559,adenyl ribonucleotide binding;GO:0016879,ligase activity, forming carbon-nitrogen bond…	ko00230,Purine metabolism;ko01100,Metabolic pathways
281	sp|P26641|EF1G_HUMAN	Elongation factor 1-gamma OS=Homo sapiens OX=9606 GN=EEF1G PE=1 SV=3		up	1	1.58769	0.00724294	multi-organism process;response to stimulus;cellular process;metabolic process	extracellular region;cell;cell part;extracellular region part;organelle	binding;catalytic activity	Posttranslational modification, protein turnover, chaperones ;		GO:0051186,cofactor metabolic process;GO:0034961,cellular biopolymer biosynthetic process;GO:0010467,gene expression;GO:0043284,biopolymer biosynthetic process;GO:0006732,coenzyme metabolic process;GO:0044260,cellular macromolecule metabolic process;GO:0009059,macromolecule biosynthetic process;GO:0050896,response to stimulus;GO:0006575,cellular amino acid derivative metabolic process;GO:0051704,…	GO:0005783,endoplasmic reticulum;GO:0044421,extracellular region part;GO:0016020,membrane;GO:0005622,intracellular;GO:0044444,cytoplasmic part;GO:0031982,vesicle;GO:0005623,cell;GO:0043230,extracellular organelle;GO:0044464,cell part;GO:0005576,extracellular region;GO:0043229,intracellular organelle;GO:0005737,cytoplasm;GO:0043226,organelle;GO:0005634,nucleus;GO:0044424,intracellular part;GO:0070…	GO:0008135,translation factor activity, nucleic acid binding;GO:0003824,catalytic activity;GO:0045182,translation regulator activity;GO:0016740,transferase activity;GO:0003746,translation elongation factor activity;GO:0003676,nucleic acid binding;GO:0005488,binding;GO:0005515,protein binding
284	sp|Q02790|FKBP4_HUMAN	Peptidyl-prolyl cis-trans isomerase FKBP4 OS=Homo sapiens OX=9606 GN=FKBP4 PE=1 SV=3		up	1	1.57673	0.00354171	response to stimulus;biological regulation;reproduction;cellular component organization or biogenesis;regulation of biological process;establishment of localization;developmental process;metabolic process;signaling;reproductive process;multi-organism process;multicellular organismal process;negative regulation of biological process;localization;cellular process	organelle part;membrane-enclosed lumen;extracellular region part;cell part;organelle;macromolecular complex;extracellular region;cell	catalytic activity;binding	Posttranslational modification, protein turnover, chaperones ;		GO:0003006,reproductive developmental process;GO:0051234,establishment of localization;GO:0000413,protein peptidyl-prolyl isomerization;GO:0051493,regulation of cytoskeleton organization;GO:0032269,negative regulation of cellular protein metabolic process;GO:0030001,metal ion transport;GO:0022607,cellular component assembly;GO:0045664,regulation of neuron differentiation;GO:0051960,regulation of …	GO:0005856,cytoskeleton;GO:0005789,endoplasmic reticulum membrane;GO:0065010,extracellular membrane-bounded organelle;GO:0043231,intracellular membrane-bounded organelle;GO:0005576,extracellular region;GO:0043232,intracellular non-membrane-bounded organelle;GO:0070062,extracellular vesicular exosome;GO:0005634,nucleus;GO:0043228,non-membrane-bounded organelle;GO:0043229,intracellular organelle;GO…	GO:0035258,steroid hormone receptor binding;GO:0000166,nucleotide binding;GO:0001883,purine nucleoside binding;GO:0005525,GTP binding;GO:0030674,protein binding, bridging;GO:0031072,heat shock protein binding;GO:0032559,adenyl ribonucleotide binding;GO:0032553,ribonucleotide binding;GO:0051427,hormone receptor binding;GO:0005524,ATP binding;GO:0035257,nuclear hormone receptor binding;GO:0017076,p…
293	sp|P08195|4F2_HUMAN	4F2 cell-surface antigen heavy chain OS=Homo sapiens OX=9606 GN=SLC3A2 PE=1 SV=3		down	1	0.633925	0.0128192	cellular process;locomotion;multicellular organismal process;localization;establishment of localization;metabolic process;response to stimulus;biological regulation;immune system process;cellular component organization or biogenesis;growth	extracellular region;cell;extracellular region part;cell part;organelle	catalytic activity;binding;transporter activity	Carbohydrate transport and metabolism ;	Protein digestion and absorption	GO:0008152,metabolic process;GO:0006810,transport;GO:0065008,regulation of biological quality;GO:0050900,leukocyte migration;GO:0050878,regulation of body fluid levels;GO:0015849,organic acid transport;GO:0051674,localization of cell;GO:0007596,blood coagulation;GO:0065007,biological regulation;GO:0032501,multicellular organismal process;GO:0009987,cellular process;GO:0006816,calcium ion transpor…	GO:0031982,vesicle;GO:0016020,membrane;GO:0044421,extracellular region part;GO:0044444,cytoplasmic part;GO:0005622,intracellular;GO:0009986,cell surface;GO:0048770,pigment granule;GO:0005623,cell;GO:0043230,extracellular organelle;GO:0005886,plasma membrane;GO:0045177,apical part of cell;GO:0016023,cytoplasmic membrane-bounded vesicle;GO:0005737,cytoplasm;GO:0043229,intracellular organelle;GO:003…	GO:0022804,active transmembrane transporter activity;GO:0022891,substrate-specific transmembrane transporter activity;GO:0008324,cation transmembrane transporter activity;GO:0003824,catalytic activity;GO:0003725,double-stranded RNA binding;GO:0022857,transmembrane transporter activity;GO:0005515,protein binding;GO:0005488,binding;GO:0015075,ion transmembrane transporter activity;GO:0003723,RNA bi…	ko04974,Protein digestion and absorption
300	sp|P04083|ANXA1_HUMAN	Annexin A1 OS=Homo sapiens OX=9606 GN=ANXA1 PE=1 SV=2		up	1	2.06978	0.0197804	multicellular organismal process;negative regulation of biological process;reproductive process;signaling;localization;biological regulation;reproduction;regulation of biological process;growth;cellular component organization or biogenesis;metabolic process;developmental process;death;locomotion;cell proliferation;cellular process;immune system process;response to stimulus;establishment of locali…	membrane-enclosed lumen;organelle part;organelle;cell part;extracellular region part;extracellular region;cell;macromolecular complex	enzyme regulator activity;catalytic activity;structural molecule activity;binding			GO:0002683,negative regulation of immune system process;GO:0070838,divalent metal ion transport;GO:0043434,response to peptide hormone stimulus;GO:0032879,regulation of localization;GO:0051251,positive regulation of lymphocyte activation;GO:0051048,negative regulation of secretion;GO:0019222,regulation of metabolic process;GO:0051094,positive regulation of developmental process;GO:0048523,negativ…	GO:0012505,endomembrane system;GO:0030659,cytoplasmic vesicle membrane;GO:0043230,extracellular organelle;GO:0012506,vesicle membrane;GO:0030054,cell junction;GO:0031090,organelle membrane;GO:0005764,lysosome;GO:0044444,cytoplasmic part;GO:0016324,apical plasma membrane;GO:0042995,cell projection;GO:0019897,extrinsic to plasma membrane;GO:0031966,mitochondrial membrane;GO:0043229,intracellular or…	GO:0003723,RNA binding;GO:0030674,protein binding, bridging;GO:0017111,nucleoside-triphosphatase activity;GO:0003697,single-stranded DNA binding;GO:0042623,ATPase activity, coupled;GO:0016887,ATPase activity;GO:0008289,lipid binding;GO:0016818,hydrolase activity, acting on acid anhydrides, in phosphorus-containing anhydrides;GO:0048306,calcium-dependent protein binding;GO:0005488,binding;GO:00435…
303	sp|P08758|ANXA5_HUMAN	Annexin A5 OS=Homo sapiens OX=9606 GN=ANXA5 PE=1 SV=2		up	1	3.31964	8.59201e-05	cellular process;multi-organism process;signaling;multicellular organismal process;negative regulation of biological process;localization;positive regulation of biological process;establishment of localization;metabolic process;death;response to stimulus;biological regulation;immune system process;cellular component organization or biogenesis;regulation of biological process	extracellular region;cell;synapse;extracellular region part;cell part;organelle;synapse part;organelle part	transporter activity;catalytic activity;enzyme regulator activity;binding			GO:0060548,negative regulation of cell death;GO:0002697,regulation of immune effector process;GO:0042981,regulation of apoptosis;GO:0042221,response to chemical stimulus;GO:0070271,protein complex biogenesis;GO:0009987,cellular process;GO:0065003,macromolecular complex assembly;GO:0006816,calcium ion transport;GO:0050793,regulation of developmental process;GO:0051239,regulation of multicellular o…	GO:0009986,cell surface;GO:0016323,basolateral plasma membrane;GO:0043025,cell soma;GO:0005623,cell;GO:0043230,extracellular organelle;GO:0030018,Z disc;GO:0005886,plasma membrane;GO:0030054,cell junction;GO:0031982,vesicle;GO:0044456,synapse part;GO:0044444,cytoplasmic part;GO:0005911,cell-cell junction;GO:0043231,intracellular membrane-bounded organelle;GO:0043292,contractile fiber;GO:0065010,e…	GO:0022892,substrate-specific transporter activity;GO:0005215,transporter activity;GO:0043167,ion binding;GO:0046872,metal ion binding;GO:0005488,binding;GO:0017046,peptide hormone binding;GO:0016787,hydrolase activity;GO:0042562,hormone binding;GO:0003824,catalytic activity;GO:0022890,inorganic cation transmembrane transporter activity;GO:0016817,hydrolase activity, acting on acid anhydrides;GO:…
304	sp|Q9BXJ9|NAA15_HUMAN	N-alpha-acetyltransferase 15, NatA auxiliary subunit OS=Homo sapiens OX=9606 GN=NAA15 PE=1 SV=1		up	1	1.3182	0.00132147	biological regulation;regulation of biological process;developmental process;death;metabolic process;positive regulation of biological process;negative regulation of biological process;multicellular organismal process;cellular process	macromolecular complex;cell;organelle;membrane-enclosed lumen;cell part;organelle part	binding;catalytic activity	General function prediction only ;		GO:0045935,positive regulation of nucleobase, nucleoside, nucleotide and nucleic acid metabolic process;GO:0009889,regulation of biosynthetic process;GO:0019222,regulation of metabolic process;GO:0048523,negative regulation of cellular process;GO:0051171,regulation of nitrogen compound metabolic process;GO:0044237,cellular metabolic process;GO:0043069,negative regulation of programmed cell death;…	GO:0043233,organelle lumen;GO:0005623,cell;GO:0044422,organelle part;GO:0005667,transcription factor complex;GO:0043234,protein complex;GO:0031981,nuclear lumen;GO:0005622,intracellular;GO:0044444,cytoplasmic part;GO:0044428,nuclear part;GO:0031974,membrane-enclosed lumen;GO:0044451,nucleoplasm part;GO:0016020,membrane;GO:0043227,membrane-bounded organelle;GO:0043231,intracellular membrane-bounde…	GO:0008080,N-acetyltransferase activity;GO:0008415,acyltransferase activity;GO:0016410,N-acyltransferase activity;GO:0005488,binding;GO:0005515,protein binding;GO:0016740,transferase activity;GO:0043022,ribosome binding;GO:0003824,catalytic activity;GO:0016746,transferase activity, transferring acyl groups;GO:0016407,acetyltransferase activity;GO:0043021,ribonucleoprotein binding;GO:0016747,trans…
306	sp|P23246|SFPQ_HUMAN	Splicing factor, proline- and glutamine-rich OS=Homo sapiens OX=9606 GN=SFPQ PE=1 SV=2		up	1	1.4393	0.000900271	biological regulation;response to stimulus;rhythmic process;regulation of biological process;cellular component organization or biogenesis;metabolic process;negative regulation of biological process;cellular process	cell;membrane-enclosed lumen;organelle;organelle part;cell part	binding			GO:0008380,RNA splicing;GO:0080090,regulation of primary metabolic process;GO:0006807,nitrogen compound metabolic process;GO:0060255,regulation of macromolecule metabolic process;GO:0010629,negative regulation of gene expression;GO:0045449,regulation of transcription;GO:0051252,regulation of RNA metabolic process;GO:0010556,regulation of macromolecule biosynthetic process;GO:0000377,RNA splicing,…	GO:0005654,nucleoplasm;GO:0016363,nuclear matrix;GO:0044427,chromosomal part;GO:0043227,membrane-bounded organelle;GO:0043231,intracellular membrane-bounded organelle;GO:0044446,intracellular organelle part;GO:0070013,intracellular organelle lumen;GO:0044464,cell part;GO:0043232,intracellular non-membrane-bounded organelle;GO:0043228,non-membrane-bounded organelle;GO:0000785,chromatin;GO:0005634,…	GO:0042826,histone deacetylase binding;GO:0005488,binding;GO:0019899,enzyme binding;GO:0005515,protein binding;GO:0003682,chromatin binding
308	sp|P39023|RL3_HUMAN	60S ribosomal protein L3 OS=Homo sapiens OX=9606 GN=RPL3 PE=1 SV=2		up	1	1.84083	0.0113347	viral reproduction;response to stimulus;reproduction;cellular component organization or biogenesis;establishment of localization;metabolic process;reproductive process;localization;cellular process	membrane-enclosed lumen;organelle part;organelle;cell part;extracellular region part;cell;extracellular region;macromolecular complex	binding;structural molecule activity	Translation, ribosomal structure and biogenesis ;	Ribosome	GO:0034645,cellular macromolecule biosynthetic process;GO:0043285,biopolymer catabolic process;GO:0019058,viral infectious cycle;GO:0009057,macromolecule catabolic process;GO:0043283,biopolymer metabolic process;GO:0009308,amine metabolic process;GO:0006519,cellular amino acid and derivative metabolic process;GO:0022415,viral reproductive process;GO:0006401,RNA catabolic process;GO:0016071,mRNA m…	GO:0044445,cytosolic part;GO:0043227,membrane-bounded organelle;GO:0005840,ribosome;GO:0005730,nucleolus;GO:0031988,membrane-bounded vesicle;GO:0005924,cell-substrate adherens junction;GO:0005829,cytosol;GO:0005654,nucleoplasm;GO:0032991,macromolecular complex;GO:0070161,anchoring junction;GO:0005737,cytoplasm;GO:0015934,large ribosomal subunit;GO:0005925,focal adhesion;GO:0044425,membrane part;G…	GO:0005488,binding;GO:0005515,protein binding;GO:0005198,structural molecule activity;GO:0003735,structural constituent of ribosome	ko03010,Ribosome
315	sp|O60610|DIAP1_HUMAN	Protein diaphanous homolog 1 OS=Homo sapiens OX=9606 GN=DIAPH1 PE=1 SV=2		up	1	1.21896	0.00381991	regulation of biological process;cellular component organization or biogenesis;response to stimulus;biological regulation;establishment of localization;positive regulation of biological process;developmental process;localization;signaling;locomotion;negative regulation of biological process;multicellular organismal process;cellular process	cell;cell part;organelle part;organelle	binding		Regulation of actin cytoskeleton;Shigellosis;Focal adhesion	GO:0051049,regulation of transport;GO:0003008,system process;GO:0016043,cellular component organization;GO:0051128,regulation of cellular component organization;GO:0043623,cellular protein complex assembly;GO:0007242,intracellular signaling cascade;GO:0030041,actin filament polymerization;GO:0032879,regulation of localization;GO:0030335,positive regulation of cell migration;GO:0010522,regulation …	GO:0015630,microtubule cytoskeleton;GO:0032587,ruffle membrane;GO:0005886,plasma membrane;GO:0005623,cell;GO:0016020,membrane;GO:0044430,cytoskeletal part;GO:0044444,cytoplasmic part;GO:0005622,intracellular;GO:0005815,microtubule organizing center;GO:0044422,organelle part;GO:0005829,cytosol;GO:0031252,cell leading edge;GO:0005856,cytoskeleton;GO:0031256,leading edge membrane;GO:0042995,cell pro…	GO:0051020,GTPase binding;GO:0005102,receptor binding;GO:0019899,enzyme binding;GO:0005488,binding;GO:0005515,protein binding;GO:0017048,Rho GTPase binding;GO:0017016,Ras GTPase binding;GO:0031267,small GTPase binding;GO:0008092,cytoskeletal protein binding;GO:0003779,actin binding	ko05131,Shigellosis;ko04510,Focal adhesion;ko04810,Regulation of actin cytoskeleton
316	sp|O75153|CLU_HUMAN	Clustered mitochondria protein homolog OS=Homo sapiens OX=9606 GN=CLUH PE=1 SV=2		up	1	1.65925	0.000787544	localization;cellular component organization or biogenesis;cellular process	cell;cell part	binding	General function prediction only ;		GO:0051646,mitochondrion localization;GO:0051640,organelle localization;GO:0006996,organelle organization;GO:0009987,cellular process;GO:0016043,cellular component organization;GO:0051641,cellular localization;GO:0051179,localization;GO:0007005,mitochondrion organization	GO:0044424,intracellular part;GO:0005737,cytoplasm;GO:0005622,intracellular;GO:0005623,cell;GO:0044464,cell part	GO:0003676,nucleic acid binding;GO:0003723,RNA binding;GO:0005488,binding;GO:0003729,mRNA binding
322	sp|Q8WWM7|ATX2L_HUMAN	Ataxin-2-like protein OS=Homo sapiens OX=9606 GN=ATXN2L PE=1 SV=2		up	1	1.42727	0.00897955	cellular process;cellular component organization or biogenesis;regulation of biological process;biological regulation	macromolecular complex;cell;cell part;organelle part;organelle;membrane-enclosed lumen	binding	RNA processing and modification ;		GO:0043933,macromolecular complex subunit organization;GO:0050789,regulation of biological process;GO:0044087,regulation of cellular component biogenesis;GO:0051128,regulation of cellular component organization;GO:0065003,macromolecular complex assembly;GO:0016043,cellular component organization;GO:0009987,cellular process;GO:0065007,biological regulation;GO:0050794,regulation of cellular process…	GO:0043227,membrane-bounded organelle;GO:0043231,intracellular membrane-bounded organelle;GO:0005654,nucleoplasm;GO:0032991,macromolecular complex;GO:0005737,cytoplasm;GO:0016607,nuclear speck;GO:0043229,intracellular organelle;GO:0044424,intracellular part;GO:0043226,organelle;GO:0005634,nucleus;GO:0044464,cell part;GO:0044446,intracellular organelle part;GO:0070013,intracellular organelle lumen…	GO:0005488,binding;GO:0005515,protein binding
325	sp|Q9H583|HEAT1_HUMAN	HEAT repeat-containing protein 1 OS=Homo sapiens OX=9606 GN=HEATR1 PE=1 SV=3		up	1	1.61222	0.00182951	biological regulation;regulation of biological process;cellular component organization or biogenesis;metabolic process;positive regulation of biological process;cellular process	cell;macromolecular complex;cell part;organelle part;membrane-enclosed lumen;organelle	binding			GO:0019219,regulation of nucleobase, nucleoside, nucleotide and nucleic acid metabolic process;GO:0016070,RNA metabolic process;GO:0006364,rRNA processing;GO:0034660,ncRNA metabolic process;GO:0048518,positive regulation of biological process;GO:0008152,metabolic process;GO:0050789,regulation of biological process;GO:0042254,ribosome biogenesis;GO:0051173,positive regulation of nitrogen compound …	GO:0032991,macromolecular complex;GO:0044452,nucleolar part;GO:0030686,90S preribosome;GO:0005730,nucleolus;GO:0043227,membrane-bounded organelle;GO:0043231,intracellular membrane-bounded organelle;GO:0070013,intracellular organelle lumen;GO:0044446,intracellular organelle part;GO:0044464,cell part;GO:0032040,small-subunit processome;GO:0043232,intracellular non-membrane-bounded organelle;GO:0005…	GO:0003676,nucleic acid binding;GO:0030515,snoRNA binding;GO:0003723,RNA binding;GO:0005488,binding;GO:0005515,protein binding
338	sp|P46087|NOP2_HUMAN	Probable 28S rRNA (cytosine(4447)-C(5))-methyltransferase OS=Homo sapiens OX=9606 GN=NOP2 PE=1 SV=2		up	1	1.50324	0.00560733	biological regulation;regulation of biological process;cellular component organization or biogenesis;cell proliferation;positive regulation of biological process;metabolic process;cellular process	cell;organelle;membrane-enclosed lumen;organelle part;cell part	catalytic activity;binding	Translation, ribosomal structure and biogenesis ;	Microbial metabolism in diverse environments;Selenoamino acid metabolism;Histidine metabolism;Tyrosine metabolism	GO:0044260,cellular macromolecule metabolic process;GO:0006807,nitrogen compound metabolic process;GO:0010467,gene expression;GO:0008284,positive regulation of cell proliferation;GO:0006396,RNA processing;GO:0048522,positive regulation of cellular process;GO:0006139,nucleobase, nucleoside, nucleotide and nucleic acid metabolic process;GO:0044085,cellular component biogenesis;GO:0034960,cellular b…	GO:0005730,nucleolus;GO:0043227,membrane-bounded organelle;GO:0043231,intracellular membrane-bounded organelle;GO:0043229,intracellular organelle;GO:0043228,non-membrane-bounded organelle;GO:0044424,intracellular part;GO:0043226,organelle;GO:0005634,nucleus;GO:0044464,cell part;GO:0043232,intracellular non-membrane-bounded organelle;GO:0044446,intracellular organelle part;GO:0070013,intracellular…	GO:0008757,S-adenosylmethionine-dependent methyltransferase activity;GO:0005515,protein binding;GO:0005488,binding;GO:0016741,transferase activity, transferring one-carbon groups;GO:0008168,methyltransferase activity;GO:0016740,transferase activity;GO:0003824,catalytic activity	ko01120,Microbial metabolism in diverse environments;ko00450,Selenoamino acid metabolism;ko00350,Tyrosine metabolism;ko00340,Histidine metabolism
340	sp|P78347|GTF2I_HUMAN	General transcription factor II-I OS=Homo sapiens OX=9606 GN=GTF2I PE=1 SV=2		down	1	0.636113	0.0174154	regulation of biological process;response to stimulus;biological regulation;metabolic process;developmental process;signaling;negative regulation of biological process;multicellular organismal process;cellular process	cell;membrane-enclosed lumen;organelle;cell part;organelle part	binding;nucleic acid binding transcription factor activity		Basal transcription factors	GO:0006367,transcription initiation from RNA polymerase II promoter;GO:0007165,signal transduction;GO:0032774,RNA biosynthetic process;GO:0009058,biosynthetic process;GO:0016043,cellular component organization;GO:0006875,cellular metal ion homeostasis;GO:0019725,cellular homeostasis;GO:0055082,cellular chemical homeostasis;GO:0007154,cell communication;GO:0044260,cellular macromolecule metabolic …	GO:0005654,nucleoplasm;GO:0005829,cytosol;GO:0043227,membrane-bounded organelle;GO:0043231,intracellular membrane-bounded organelle;GO:0042995,cell projection;GO:0044464,cell part;GO:0044446,intracellular organelle part;GO:0070013,intracellular organelle lumen;GO:0043229,intracellular organelle;GO:0005737,cytoplasm;GO:0043226,organelle;GO:0044424,intracellular part;GO:0005634,nucleus;GO:0043025,c…	GO:0051019,mitogen-activated protein kinase binding;GO:0005515,protein binding;GO:0003677,DNA binding;GO:0019899,enzyme binding;GO:0005488,binding;GO:0019900,kinase binding;GO:0003700,transcription factor activity;GO:0019901,protein kinase binding;GO:0003676,nucleic acid binding;GO:0030528,transcription regulator activity	ko03022,Basal transcription factors
344	sp|Q9UQ80|PA2G4_HUMAN	Proliferation-associated protein 2G4 OS=Homo sapiens OX=9606 GN=PA2G4 PE=1 SV=3		up	1	1.49882	0.0454956	cellular process;cell proliferation;negative regulation of biological process;metabolic process;death;developmental process;positive regulation of biological process;cellular component organization or biogenesis;regulation of biological process;biological regulation	membrane-enclosed lumen;organelle part;organelle;extracellular region part;cell part;cell;extracellular region;macromolecular complex	nucleic acid binding transcription factor activity;binding	Translation, ribosomal structure and biogenesis ;	ErbB signaling pathway;Endocytosis;Calcium signaling pathway	GO:0048522,positive regulation of cellular process;GO:0044260,cellular macromolecule metabolic process;GO:0010468,regulation of gene expression;GO:0009892,negative regulation of metabolic process;GO:0010608,posttranscriptional regulation of gene expression;GO:0045595,regulation of cell differentiation;GO:0009890,negative regulation of biosynthetic process;GO:0045597,positive regulation of cell di…	GO:0043233,organelle lumen;GO:0005623,cell;GO:0043230,extracellular organelle;GO:0044421,extracellular region part;GO:0016020,membrane;GO:0005622,intracellular;GO:0044428,nuclear part;GO:0031974,membrane-enclosed lumen;GO:0031981,nuclear lumen;GO:0031982,vesicle;GO:0044422,organelle part;GO:0030529,ribonucleoprotein complex;GO:0005654,nucleoplasm;GO:0032991,macromolecular complex;GO:0005730,nucle…	GO:0003700,transcription factor activity;GO:0019899,enzyme binding;GO:0003677,DNA binding;GO:0005515,protein binding;GO:0005488,binding;GO:0030528,transcription regulator activity;GO:0003676,nucleic acid binding;GO:0031625,ubiquitin protein ligase binding	ko04020,Calcium signaling pathway;ko04144,Endocytosis;ko04012,ErbB signaling pathway
346	sp|Q13011|ECH1_HUMAN	Delta(3,5)-Delta(2,4)-dienoyl-CoA isomerase, mitochondrial OS=Homo sapiens OX=9606 GN=ECH1 PE=1 SV=2		down	1	0.390232	0.000546022	metabolic process;cellular process	extracellular region;cell;organelle;cell part;extracellular region part	binding;catalytic activity	Lipid transport and metabolism ;	Peroxisome	GO:0046395,carboxylic acid catabolic process;GO:0008152,metabolic process;GO:0034440,lipid oxidation;GO:0044237,cellular metabolic process;GO:0032787,monocarboxylic acid metabolic process;GO:0016042,lipid catabolic process;GO:0009987,cellular process;GO:0009056,catabolic process;GO:0019395,fatty acid oxidation;GO:0042180,cellular ketone metabolic process;GO:0006629,lipid metabolic process;GO:0009…	GO:0044464,cell part;GO:0005576,extracellular region;GO:0043229,intracellular organelle;GO:0005737,cytoplasm;GO:0043226,organelle;GO:0044424,intracellular part;GO:0070062,extracellular vesicular exosome;GO:0005777,peroxisome;GO:0043231,intracellular membrane-bounded organelle;GO:0043227,membrane-bounded organelle;GO:0031988,membrane-bounded vesicle;GO:0065010,extracellular membrane-bounded organe…	GO:0003824,catalytic activity;GO:0016853,isomerase activity;GO:0005102,receptor binding;GO:0005488,binding;GO:0005515,protein binding	ko04146,Peroxisome
347	sp|Q16222|UAP1_HUMAN	UDP-N-acetylhexosamine pyrophosphorylase OS=Homo sapiens OX=9606 GN=UAP1 PE=1 SV=3		up	1	1.62112	0.0151797	cellular process;metabolic process	cell;cell part;organelle part;membrane-enclosed lumen;organelle	catalytic activity;binding	Carbohydrate transport and metabolism ;	Metabolic pathways;Amino sugar and nucleotide sugar metabolism	GO:0008152,metabolic process;GO:0009100,glycoprotein metabolic process;GO:0006464,protein modification process;GO:0006041,glucosamine metabolic process;GO:0044267,cellular protein metabolic process;GO:0005996,monosaccharide metabolic process;GO:0046349,amino sugar biosynthetic process;GO:0009987,cellular process;GO:0006047,UDP-N-acetylglucosamine metabolic process;GO:0043170,macromolecule metabol…	GO:0044464,cell part;GO:0044446,intracellular organelle part;GO:0070013,intracellular organelle lumen;GO:0043229,intracellular organelle;GO:0005737,cytoplasm;GO:0044424,intracellular part;GO:0043226,organelle;GO:0005634,nucleus;GO:0005654,nucleoplasm;GO:0005829,cytosol;GO:0043231,intracellular membrane-bounded organelle;GO:0043227,membrane-bounded organelle;GO:0016020,membrane;GO:0005622,intracel…	GO:0030246,carbohydrate binding;GO:0005488,binding;GO:0005515,protein binding;GO:0003824,catalytic activity;GO:0016740,transferase activity;GO:0016779,nucleotidyltransferase activity;GO:0016772,transferase activity, transferring phosphorus-containing groups;GO:0042802,identical protein binding	ko01100,Metabolic pathways;ko00520,Amino sugar and nucleotide sugar metabolism
349	sp|P17655|CAN2_HUMAN	Calpain-2 catalytic subunit OS=Homo sapiens OX=9606 GN=CAPN2 PE=1 SV=6		up	1	1.5137	0.000390819	cellular process;multicellular organismal process;developmental process;metabolic process;regulation of biological process;cellular component organization or biogenesis;response to stimulus;biological regulation	organelle part;extracellular region part;cell part;organelle;cell;extracellular region	catalytic activity;binding		Focal adhesion;Apoptosis;Alzheimer's disease;Protein processing in endoplasmic reticulum	GO:0050794,regulation of cellular process;GO:0042221,response to chemical stimulus;GO:0019538,protein metabolic process;GO:0009987,cellular process;GO:0032501,multicellular organismal process;GO:0065007,biological regulation;GO:0048731,system development;GO:0043170,macromolecule metabolic process;GO:0044267,cellular protein metabolic process;GO:0007275,multicellular organismal development;GO:0042…	GO:0005856,cytoskeleton;GO:0030055,cell-substrate junction;GO:0043231,intracellular membrane-bounded organelle;GO:0042995,cell projection;GO:0065010,extracellular membrane-bounded organelle;GO:0043232,intracellular non-membrane-bounded organelle;GO:0005576,extracellular region;GO:0015629,actin cytoskeleton;GO:0030425,dendrite;GO:0044459,plasma membrane part;GO:0030864,cortical actin cytoskeleton;…	GO:0046982,protein heterodimerization activity;GO:0043169,cation binding;GO:0004175,endopeptidase activity;GO:0046983,protein dimerization activity;GO:0004197,cysteine-type endopeptidase activity;GO:0043167,ion binding;GO:0070011,peptidase activity, acting on L-amino acid peptides;GO:0005515,protein binding;GO:0005488,binding;GO:0046872,metal ion binding;GO:0008233,peptidase activity;GO:0005509,c…	ko04141,Protein processing in endoplasmic reticulum;ko05010,Alzheimer's disease;ko04210,Apoptosis;ko04510,Focal adhesion
352	sp|P26006|ITA3_HUMAN	Integrin alpha-3 OS=Homo sapiens OX=9606 GN=ITGA3 PE=1 SV=5		down	1	0.44832	6.26539e-05	locomotion;cellular process;immune system process;response to stimulus;establishment of localization;positive regulation of biological process;localization;multicellular organismal process;negative regulation of biological process;signaling;reproductive process;multi-organism process;regulation of biological process;reproduction;cellular component organization or biogenesis;biological regulation;…	synapse;macromolecular complex;extracellular region;cell;organelle;cell part;extracellular region part	binding		Regulation of actin cytoskeleton;ECM-receptor interaction;Dilated cardiomyopathy;Hematopoietic cell lineage;Small cell lung cancer;Arrhythmogenic right ventricular cardiomyopathy (ARVC);Focal adhesion;Pathways in cancer;Hypertrophic cardiomyopathy (HCM)	GO:0048609,reproductive process in a multicellular organism;GO:0007398,ectoderm development;GO:0007611,learning or memory;GO:0050789,regulation of biological process;GO:0009653,anatomical structure morphogenesis;GO:0051674,localization of cell;GO:0046578,regulation of Ras protein signal transduction;GO:0048731,system development;GO:0050817,coagulation;GO:0050794,regulation of cellular process;GO:…	GO:0065010,extracellular membrane-bounded organelle;GO:0042995,cell projection;GO:0016021,integral to membrane;GO:0031226,intrinsic to plasma membrane;GO:0030055,cell-substrate junction;GO:0044463,cell projection part;GO:0070062,extracellular vesicular exosome;GO:0031224,intrinsic to membrane;GO:0005912,adherens junction;GO:0005576,extracellular region;GO:0044459,plasma membrane part;GO:0009897,e…	GO:0043169,cation binding;GO:0019899,enzyme binding;GO:0043236,laminin binding;GO:0046982,protein heterodimerization activity;GO:0001968,fibronectin binding;GO:0032403,protein complex binding;GO:0019904,protein domain specific binding;GO:0005178,integrin binding;GO:0001948,glycoprotein binding;GO:0002020,protease binding;GO:0005518,collagen binding;GO:0046983,protein dimerization activity;GO:0005…	ko05412,Arrhythmogenic right ventricular cardiomyopathy (ARVC);ko05222,Small cell lung cancer;ko04510,Focal adhesion;ko04810,Regulation of actin cytoskeleton;ko05410,Hypertrophic cardiomyopathy (HCM);ko05414,Dilated cardiomyopathy;ko04640,Hematopoietic cell lineage;ko04512,ECM-receptor interaction;ko05200,Pathways in cancer
353	sp|P05556|ITB1_HUMAN	Integrin beta-1 OS=Homo sapiens OX=9606 GN=ITGB1 PE=1 SV=2		down	1	0.6299	0.00158527	reproduction;cellular component organization or biogenesis;regulation of biological process;growth;biological regulation;viral reproduction;biological adhesion;metabolic process;developmental process;death;localization;multicellular organismal process;negative regulation of biological process;signaling;multi-organism process;reproductive process;immune system process;response to stimulus;establis…	organelle;cell part;extracellular region part;synapse;extracellular region;cell;macromolecular complex	molecular transducer activity;binding		Regulation of actin cytoskeleton;Bacterial invasion of epithelial cells;ECM-receptor interaction;Pathogenic Escherichia coli infection;Cell adhesion molecules (CAMs);Dilated cardiomyopathy;Phagosome;Hypertrophic cardiomyopathy (HCM);Leukocyte transendothelial migration;Toxoplasmosis;Small cell lung cancer;Axon guidance;Arrhythmogenic right ventricular cardiomyopathy (ARVC);Focal adhesion;Pathways…	GO:0048468,cell development;GO:0031344,regulation of cell projection organization;GO:0022008,neurogenesis;GO:0051726,regulation of cell cycle;GO:0016477,cell migration;GO:0008104,protein localization;GO:0051649,establishment of localization in cell;GO:0022402,cell cycle process;GO:0007155,cell adhesion;GO:0032989,cellular component morphogenesis;GO:0030902,hindbrain development;GO:0022414,reprodu…	GO:0032154,cleavage furrow;GO:0031252,cell leading edge;GO:0070161,anchoring junction;GO:0034667,alpha3-beta1 integrin complex;GO:0044420,extracellular matrix part;GO:0032991,macromolecular complex;GO:0042383,sarcolemma;GO:0043226,organelle;GO:0044424,intracellular part;GO:0042470,melanosome;GO:0001726,ruffle;GO:0030027,lamellipodium;GO:0048770,pigment granule;GO:0005768,endosome;GO:0005622,intra…	GO:0001948,glycoprotein binding;GO:0004872,receptor activity;GO:0002020,protease binding;GO:0046983,protein dimerization activity;GO:0003779,actin binding;GO:0051393,alpha-actinin binding;GO:0042805,actinin binding;GO:0019900,kinase binding;GO:0043169,cation binding;GO:0046982,protein heterodimerization activity;GO:0043236,laminin binding;GO:0019899,enzyme binding;GO:0001968,fibronectin binding;G…	ko05131,Shigellosis;ko05412,Arrhythmogenic right ventricular cardiomyopathy (ARVC);ko04670,Leukocyte transendothelial migration;ko05140,Leishmaniasis;ko05145,Toxoplasmosis;ko04145,Phagosome;ko04514,Cell adhesion molecules (CAMs);ko05130,Pathogenic Escherichia coli infection;ko05410,Hypertrophic cardiomyopathy (HCM);ko05222,Small cell lung cancer;ko04510,Focal adhesion;ko04810,Regulation of actin …
356	sp|Q9H4A4|AMPB_HUMAN	Aminopeptidase B OS=Homo sapiens OX=9606 GN=RNPEP PE=1 SV=2		down	1	0.736657	0.0412568	metabolic process;cellular process;biological regulation;multicellular organismal process	organelle;cell part;extracellular region part;extracellular region;cell	binding;catalytic activity	Amino acid transport and metabolism ;		GO:0043170,macromolecule metabolic process;GO:0009987,cellular process;GO:0032501,multicellular organismal process;GO:0046394,carboxylic acid biosynthetic process;GO:0065007,biological regulation;GO:0008217,regulation of blood pressure;GO:0019538,protein metabolic process;GO:0019370,leukotriene biosynthetic process;GO:0042180,cellular ketone metabolic process;GO:0065008,regulation of biological q…	GO:0043226,organelle;GO:0044424,intracellular part;GO:0070062,extracellular vesicular exosome;GO:0043229,intracellular organelle;GO:0005737,cytoplasm;GO:0016023,cytoplasmic membrane-bounded vesicle;GO:0005576,extracellular region;GO:0044464,cell part;GO:0031410,cytoplasmic vesicle;GO:0065010,extracellular membrane-bounded organelle;GO:0031988,membrane-bounded vesicle;GO:0005615,extracellular spac…	GO:0046914,transition metal ion binding;GO:0042277,peptide binding;GO:0043169,cation binding;GO:0070006,metalloaminopeptidase activity;GO:0008270,zinc ion binding;GO:0008238,exopeptidase activity;GO:0043167,ion binding;GO:0005488,binding;GO:0070011,peptidase activity, acting on L-amino acid peptides;GO:0004177,aminopeptidase activity;GO:0046872,metal ion binding;GO:0008233,peptidase activity;GO:0…
358	sp|P09525|ANXA4_HUMAN	Annexin A4 OS=Homo sapiens OX=9606 GN=ANXA4 PE=1 SV=4		down	1	0.737428	0.00407756	death;developmental process;metabolic process;establishment of localization;biological regulation;response to stimulus;regulation of biological process;cellular process;multicellular organismal process;negative regulation of biological process;signaling;localization	cell;extracellular region;organelle;organelle part;extracellular region part;cell part	enzyme regulator activity;binding			GO:0080090,regulation of primary metabolic process;GO:0050793,regulation of developmental process;GO:0051101,regulation of DNA binding;GO:0009887,organ morphogenesis;GO:0045449,regulation of transcription;GO:0030855,epithelial cell differentiation;GO:0065009,regulation of molecular function;GO:0051252,regulation of RNA metabolic process;GO:0060255,regulation of macromolecule metabolic process;GO:…	GO:0009986,cell surface;GO:0012505,endomembrane system;GO:0030659,cytoplasmic vesicle membrane;GO:0012506,vesicle membrane;GO:0005623,cell;GO:0005886,plasma membrane;GO:0043230,extracellular organelle;GO:0031090,organelle membrane;GO:0031982,vesicle;GO:0030141,secretory granule;GO:0044444,cytoplasmic part;GO:0044428,nuclear part;GO:0044433,cytoplasmic vesicle part;GO:0043231,intracellular membran…	GO:0008289,lipid binding;GO:0005543,phospholipid binding;GO:0042802,identical protein binding;GO:0051059,NF-kappaB binding;GO:0030246,carbohydrate binding;GO:0008134,transcription factor binding;GO:0030247,polysaccharide binding;GO:0004857,enzyme inhibitor activity;GO:0043169,cation binding;GO:0055102,lipase inhibitor activity;GO:0005539,glycosaminoglycan binding;GO:0008201,heparin binding;GO:003…
359	sp|Q15046|SYK_HUMAN	Lysine--tRNA ligase OS=Homo sapiens OX=9606 GN=KARS1 PE=1 SV=3		up	1	1.27626	0.0375388	metabolic process;cellular process;viral reproduction	organelle part;cell part;organelle;membrane-enclosed lumen;macromolecular complex;cell;extracellular region	binding;catalytic activity	Translation, ribosomal structure and biogenesis ;	Aminoacyl-tRNA biosynthesis	GO:0009119,ribonucleoside metabolic process;GO:0034961,cellular biopolymer biosynthetic process;GO:0006807,nitrogen compound metabolic process;GO:0001887,selenium metabolic process;GO:0034960,cellular biopolymer metabolic process;GO:0044238,primary metabolic process;GO:0046128,purine ribonucleoside metabolic process;GO:0034470,ncRNA processing;GO:0006082,organic acid metabolic process;GO:0044267,…	GO:0044429,mitochondrial part;GO:0044422,organelle part;GO:0043234,protein complex;GO:0031980,mitochondrial lumen;GO:0044444,cytoplasmic part;GO:0031974,membrane-enclosed lumen;GO:0005622,intracellular;GO:0016020,membrane;GO:0005739,mitochondrion;GO:0005759,mitochondrial matrix;GO:0005623,cell;GO:0043233,organelle lumen;GO:0005886,plasma membrane;GO:0015630,microtubule cytoskeleton;GO:0005634,nuc…	GO:0001883,purine nucleoside binding;GO:0000166,nucleotide binding;GO:0043169,cation binding;GO:0032559,adenyl ribonucleotide binding;GO:0003723,RNA binding;GO:0032553,ribonucleotide binding;GO:0016874,ligase activity;GO:0005524,ATP binding;GO:0016597,amino acid binding;GO:0016876,ligase activity, forming aminoacyl-tRNA and related compounds;GO:0031406,carboxylic acid binding;GO:0017076,purine nu…	ko00970,Aminoacyl-tRNA biosynthesis
365	sp|Q9NSD9|SYFB_HUMAN	Phenylalanine--tRNA ligase beta subunit OS=Homo sapiens OX=9606 GN=FARSB PE=1 SV=3		up	1	1.36711	0.0349834	cellular process;metabolic process	cell part;cell;macromolecular complex	binding;catalytic activity	Translation, ribosomal structure and biogenesis ;	Aminoacyl-tRNA biosynthesis	GO:0034660,ncRNA metabolic process;GO:0016070,RNA metabolic process;GO:0044267,cellular protein metabolic process;GO:0008152,metabolic process;GO:0019538,protein metabolic process;GO:0042180,cellular ketone metabolic process;GO:0043170,macromolecule metabolic process;GO:0009987,cellular process;GO:0006520,cellular amino acid metabolic process;GO:0043038,amino acid activation;GO:0006807,nitrogen c…	GO:0005623,cell;GO:0032991,macromolecular complex;GO:0005829,cytosol;GO:0044444,cytoplasmic part;GO:0005622,intracellular;GO:0016020,membrane;GO:0044464,cell part;GO:0044424,intracellular part;GO:0043234,protein complex;GO:0005737,cytoplasm	GO:0032555,purine ribonucleotide binding;GO:0003824,catalytic activity;GO:0016875,ligase activity, forming carbon-oxygen bonds;GO:0046872,metal ion binding;GO:0005488,binding;GO:0004812,aminoacyl-tRNA ligase activity;GO:0030554,adenyl nucleotide binding;GO:0001882,nucleoside binding;GO:0003676,nucleic acid binding;GO:0043167,ion binding;GO:0032553,ribonucleotide binding;GO:0016874,ligase activity…	ko00970,Aminoacyl-tRNA biosynthesis
370	sp|Q9H0A0|NAT10_HUMAN	RNA cytidine acetyltransferase OS=Homo sapiens OX=9606 GN=NAT10 PE=1 SV=2		up	1	1.29312	0.0108265	biological regulation;negative regulation of biological process;regulation of biological process;cellular component organization or biogenesis;metabolic process;cellular process	cell part;organelle part;membrane-enclosed lumen;organelle;cell;macromolecular complex	binding;catalytic activity	General function prediction only ;		GO:0033044,regulation of chromosome organization;GO:0010467,gene expression;GO:0032845,negative regulation of homeostatic process;GO:0006396,RNA processing;GO:0044260,cellular macromolecule metabolic process;GO:0051053,negative regulation of DNA metabolic process;GO:0006139,nucleobase, nucleoside, nucleotide and nucleic acid metabolic process;GO:0006399,tRNA metabolic process;GO:0009892,negative …	GO:0031981,nuclear lumen;GO:0000784,nuclear chromosome, telomeric region;GO:0005694,chromosome;GO:0030529,ribonucleoprotein complex;GO:0044422,organelle part;GO:0044454,nuclear chromosome part;GO:0016020,membrane;GO:0031974,membrane-enclosed lumen;GO:0044428,nuclear part;GO:0005622,intracellular;GO:0000781,chromosome, telomeric region;GO:0005623,cell;GO:0043233,organelle lumen;GO:0043229,intracel…	GO:0017076,purine nucleotide binding;GO:0005524,ATP binding;GO:0032553,ribonucleotide binding;GO:0016407,acetyltransferase activity;GO:0032559,adenyl ribonucleotide binding;GO:0000166,nucleotide binding;GO:0001883,purine nucleoside binding;GO:0016746,transferase activity, transferring acyl groups;GO:0003824,catalytic activity;GO:0016740,transferase activity;GO:0016747,transferase activity, transf…
375	sp|Q9BZE4|NOG1_HUMAN	Nucleolar GTP-binding protein 1 OS=Homo sapiens OX=9606 GN=GTPBP4 PE=1 SV=3		up	1	1.21343	0.0127915	biological regulation;cellular component organization or biogenesis;regulation of biological process;metabolic process;developmental process;biological adhesion;negative regulation of biological process;multicellular organismal process;locomotion;cell proliferation;localization;cellular process	organelle part;cell part;membrane-enclosed lumen;organelle;cell	binding;catalytic activity	General function prediction only ;		GO:0032502,developmental process;GO:0009892,negative regulation of metabolic process;GO:0010468,regulation of gene expression;GO:0001503,ossification;GO:0042325,regulation of phosphorylation;GO:0001649,osteoblast differentiation;GO:0030154,cell differentiation;GO:0001501,skeletal system development;GO:0031399,regulation of protein modification process;GO:0009890,negative regulation of biosyntheti…	GO:0048471,perinuclear region of cytoplasm;GO:0005730,nucleolus;GO:0043227,membrane-bounded organelle;GO:0043231,intracellular membrane-bounded organelle;GO:0005635,nuclear envelope;GO:0031967,organelle envelope;GO:0031965,nuclear membrane;GO:0043229,intracellular organelle;GO:0005737,cytoplasm;GO:0043228,non-membrane-bounded organelle;GO:0044424,intracellular part;GO:0043226,organelle;GO:0005634…	GO:0032553,ribonucleotide binding;GO:0017111,nucleoside-triphosphatase activity;GO:0016818,hydrolase activity, acting on acid anhydrides, in phosphorus-containing anhydrides;GO:0019001,guanyl nucleotide binding;GO:0032561,guanyl ribonucleotide binding;GO:0016462,pyrophosphatase activity;GO:0017076,purine nucleotide binding;GO:0000166,nucleotide binding;GO:0005525,GTP binding;GO:0003924,GTPase act…
376	sp|P38919|IF4A3_HUMAN	Eukaryotic initiation factor 4A-III OS=Homo sapiens OX=9606 GN=EIF4A3 PE=1 SV=4		up	1	1.23346	0.0302098	response to stimulus;biological regulation;regulation of biological process;cellular component organization or biogenesis;positive regulation of biological process;establishment of localization;developmental process;metabolic process;signaling;multicellular organismal process;localization;cellular process	macromolecular complex;cell;organelle;membrane-enclosed lumen;cell part;organelle part	catalytic activity;binding	Replication, recombination and repair ; Transcription ; Translation, ribosomal structure and biogenesis ;	RNA transport;Spliceosome	GO:0009057,macromolecule catabolic process;GO:0043283,biopolymer metabolic process;GO:0043009,chordate embryonic development;GO:0043285,biopolymer catabolic process;GO:0051246,regulation of protein metabolic process;GO:0048856,anatomical structure development;GO:0006519,cellular amino acid and derivative metabolic process;GO:0031328,positive regulation of cellular biosynthetic process;GO:0009308,…	GO:0032991,macromolecular complex;GO:0005654,nucleoplasm;GO:0005829,cytosol;GO:0043227,membrane-bounded organelle;GO:0044446,intracellular organelle part;GO:0070013,intracellular organelle lumen;GO:0044464,cell part;GO:0044424,intracellular part;GO:0043226,organelle;GO:0016607,nuclear speck;GO:0005737,cytoplasm;GO:0005622,intracellular;GO:0043005,neuron projection;GO:0035145,exon-exon junction co…	GO:0005515,protein binding;GO:0030554,adenyl nucleotide binding;GO:0001882,nucleoside binding;GO:0000166,nucleotide binding;GO:0003727,single-stranded RNA binding;GO:0070717,poly-purine tract binding;GO:0004004,ATP-dependent RNA helicase activity;GO:0016462,pyrophosphatase activity;GO:0017076,purine nucleotide binding;GO:0005488,binding;GO:0003676,nucleic acid binding;GO:0003724,RNA helicase acti…	ko03013,RNA transport;ko03040,Spliceosome
378	sp|Q02809|PLOD1_HUMAN	Procollagen-lysine,2-oxoglutarate 5-dioxygenase 1 OS=Homo sapiens OX=9606 GN=PLOD1 PE=1 SV=2		down	1	0.547958	0.000315796	cellular component organization or biogenesis;response to stimulus;multicellular organismal process;cellular process;developmental process;metabolic process	extracellular region part;organelle part;cell part;organelle;extracellular region;cell	binding;catalytic activity		Lysine degradation	GO:0019752,carboxylic acid metabolic process;GO:0030198,extracellular matrix organization;GO:0044262,cellular carbohydrate metabolic process;GO:0008652,cellular amino acid biosynthetic process;GO:0050896,response to stimulus;GO:0048513,organ development;GO:0009888,tissue development;GO:0044260,cellular macromolecule metabolic process;GO:0018193,peptidyl-amino acid modification;GO:0043436,oxoacid …	GO:0044444,cytoplasmic part;GO:0005622,intracellular;GO:0016020,membrane;GO:0005783,endoplasmic reticulum;GO:0044421,extracellular region part;GO:0044432,endoplasmic reticulum part;GO:0044422,organelle part;GO:0031982,vesicle;GO:0031090,organelle membrane;GO:0043230,extracellular organelle;GO:0005623,cell;GO:0012505,endomembrane system;GO:0005791,rough endoplasmic reticulum;GO:0044446,intracellul…	GO:0005506,iron ion binding;GO:0043169,cation binding;GO:0016706,oxidoreductase activity, acting on paired donors, with incorporation or reduction of molecular oxygen, 2-oxoglutarate as one donor, and incorporation of one atom each of oxygen into both donors;GO:0046914,transition metal ion binding;GO:0008475,procollagen-lysine 5-dioxygenase activity;GO:0016705,oxidoreductase activity, acting on p…	ko00310,Lysine degradation
383	sp|P33527|MRP1_HUMAN	Multidrug resistance-associated protein 1 OS=Homo sapiens OX=9606 GN=ABCC1 PE=1 SV=3		down	1	0.787144	0.00978643	response to stimulus;localization;establishment of localization;metabolic process;cellular process	extracellular region part;cell part;organelle;cell;extracellular region	catalytic activity;binding;transporter activity	Defense mechanisms ;	ABC transporters	GO:0006807,nitrogen compound metabolic process;GO:0051186,cofactor metabolic process;GO:0000038,very-long-chain fatty acid metabolic process;GO:0019752,carboxylic acid metabolic process;GO:0043449,cellular alkene metabolic process;GO:0051234,establishment of localization;GO:0006691,leukotriene metabolic process;GO:0050896,response to stimulus;GO:0051179,localization;GO:0043436,oxoacid metabolic p…	GO:0044459,plasma membrane part;GO:0005576,extracellular region;GO:0044464,cell part;GO:0043226,organelle;GO:0070062,extracellular vesicular exosome;GO:0031224,intrinsic to membrane;GO:0044425,membrane part;GO:0031226,intrinsic to plasma membrane;GO:0016021,integral to membrane;GO:0065010,extracellular membrane-bounded organelle;GO:0031988,membrane-bounded vesicle;GO:0043227,membrane-bounded orga…	GO:0001882,nucleoside binding;GO:0005215,transporter activity;GO:0015399,primary active transmembrane transporter activity;GO:0016820,hydrolase activity, acting on acid anhydrides, catalyzing transmembrane movement of substances;GO:0005488,binding;GO:0030554,adenyl nucleotide binding;GO:0016787,hydrolase activity;GO:0003824,catalytic activity;GO:0016817,hydrolase activity, acting on acid anhydrid…	ko02010,ABC transporters
384	sp|P07339|CATD_HUMAN	Cathepsin D OS=Homo sapiens OX=9606 GN=CTSD PE=1 SV=1		down	1	0.532276	0.0173388	cellular component organization or biogenesis;multicellular organismal process;immune system process;response to stimulus;cellular process;metabolic process	extracellular region;cell;organelle;membrane-enclosed lumen;organelle part;extracellular region part;cell part	binding;catalytic activity		Lysosome	GO:0002376,immune system process;GO:0022607,cellular component assembly;GO:0044248,cellular catabolic process;GO:0030198,extracellular matrix organization;GO:0007154,cell communication;GO:0050896,response to stimulus;GO:0009605,response to external stimulus;GO:0043062,extracellular structure organization;GO:0044236,multicellular organismal metabolic process;GO:0006950,response to stress;GO:004425…	GO:0043231,intracellular membrane-bounded organelle;GO:0065010,extracellular membrane-bounded organelle;GO:0016023,cytoplasmic membrane-bounded vesicle;GO:0043229,intracellular organelle;GO:0070062,extracellular vesicular exosome;GO:0005576,extracellular region;GO:0043202,lysosomal lumen;GO:0000323,lytic vacuole;GO:0031012,extracellular matrix;GO:0043233,organelle lumen;GO:0005623,cell;GO:0043230…	GO:0008233,peptidase activity;GO:0070011,peptidase activity, acting on L-amino acid peptides;GO:0005488,binding;GO:0005515,protein binding;GO:0004175,endopeptidase activity;GO:0016787,hydrolase activity;GO:0003824,catalytic activity	ko04142,Lysosome
385	sp|P18583|SON_HUMAN	Protein SON OS=Homo sapiens OX=9606 GN=SON PE=1 SV=4		up	1	1.46154	0.0252373	metabolic process;death;cellular process;biological regulation;negative regulation of biological process;regulation of biological process;cellular component organization or biogenesis	cell;cell part;organelle part;organelle;membrane-enclosed lumen	binding			GO:0006396,RNA processing;GO:0010941,regulation of cell death;GO:0010467,gene expression;GO:0006397,mRNA processing;GO:0044260,cellular macromolecule metabolic process;GO:0006139,nucleobase, nucleoside, nucleotide and nucleic acid metabolic process;GO:0007010,cytoskeleton organization;GO:0000910,cytokinesis;GO:0010468,regulation of gene expression;GO:0044237,cellular metabolic process;GO:0043069,…	GO:0044446,intracellular organelle part;GO:0070013,intracellular organelle lumen;GO:0044464,cell part;GO:0005634,nucleus;GO:0044424,intracellular part;GO:0043226,organelle;GO:0016607,nuclear speck;GO:0043229,intracellular organelle;GO:0005654,nucleoplasm;GO:0043227,membrane-bounded organelle;GO:0043231,intracellular membrane-bounded organelle;GO:0005622,intracellular;GO:0044428,nuclear part;GO:00…	GO:0003676,nucleic acid binding;GO:0019904,protein domain specific binding;GO:0050733,RS domain binding;GO:0005488,binding;GO:0003677,DNA binding;GO:0005515,protein binding
396	sp|P18124|RL7_HUMAN	60S ribosomal protein L7 OS=Homo sapiens OX=9606 GN=RPL7 PE=1 SV=1		up	1	1.23925	0.00941205	cellular process;localization;reproductive process;metabolic process;establishment of localization;reproduction;cellular component organization or biogenesis;viral reproduction	extracellular region;cell;macromolecular complex;cell part;extracellular region part;organelle;organelle part;membrane-enclosed lumen	binding;structural molecule activity	Translation, ribosomal structure and biogenesis ;	Ribosome	GO:0009069,serine family amino acid metabolic process;GO:0043284,biopolymer biosynthetic process;GO:0006396,RNA processing;GO:0010467,gene expression;GO:0044248,cellular catabolic process;GO:0006415,translational termination;GO:0019752,carboxylic acid metabolic process;GO:0051234,establishment of localization;GO:0009059,macromolecule biosynthetic process;GO:0044262,cellular carbohydrate metabolic…	GO:0043229,intracellular organelle;GO:0022625,cytosolic large ribosomal subunit;GO:0043228,non-membrane-bounded organelle;GO:0005912,adherens junction;GO:0005634,nucleus;GO:0070062,extracellular vesicular exosome;GO:0005576,extracellular region;GO:0043232,intracellular non-membrane-bounded organelle;GO:0044459,plasma membrane part;GO:0043231,intracellular membrane-bounded organelle;GO:0065010,ext…	GO:0005198,structural molecule activity;GO:0003676,nucleic acid binding;GO:0003723,RNA binding;GO:0005515,protein binding;GO:0003677,DNA binding;GO:0003729,mRNA binding;GO:0005488,binding;GO:0042803,protein homodimerization activity;GO:0046983,protein dimerization activity;GO:0003735,structural constituent of ribosome;GO:0042802,identical protein binding	ko03010,Ribosome
398	sp|P13674|P4HA1_HUMAN	Prolyl 4-hydroxylase subunit alpha-1 OS=Homo sapiens OX=9606 GN=P4HA1 PE=1 SV=2		down	1	0.71167	0.00309317	metabolic process;cellular process;cellular component organization or biogenesis	extracellular region part;cell part;organelle;macromolecular complex;cell;extracellular region;organelle part;membrane-enclosed lumen	catalytic activity;binding		Arginine and proline metabolism;Metabolic pathways	GO:0009987,cellular process;GO:0043170,macromolecule metabolic process;GO:0042180,cellular ketone metabolic process;GO:0019538,protein metabolic process;GO:0055114,oxidation reduction;GO:0008152,metabolic process;GO:0006464,protein modification process;GO:0044267,cellular protein metabolic process;GO:0046483,heterocycle metabolic process;GO:0006082,organic acid metabolic process;GO:0044238,primar…	GO:0043233,organelle lumen;GO:0005623,cell;GO:0031012,extracellular matrix;GO:0005739,mitochondrion;GO:0044444,cytoplasmic part;GO:0031974,membrane-enclosed lumen;GO:0005622,intracellular;GO:0016020,membrane;GO:0005783,endoplasmic reticulum;GO:0044421,extracellular region part;GO:0044432,endoplasmic reticulum part;GO:0044422,organelle part;GO:0043234,protein complex;GO:0032991,macromolecular comp…	GO:0003824,catalytic activity;GO:0031543,peptidyl-proline dioxygenase activity;GO:0043167,ion binding;GO:0004656,procollagen-proline 4-dioxygenase activity;GO:0005515,protein binding;GO:0005488,binding;GO:0046872,metal ion binding;GO:0019842,vitamin binding;GO:0016491,oxidoreductase activity;GO:0031406,carboxylic acid binding;GO:0031545,peptidyl-proline 4-dioxygenase activity;GO:0019798,procollag…	ko00330,Arginine and proline metabolism;ko01100,Metabolic pathways
399	sp|Q9NUQ6|SPS2L_HUMAN	SPATS2-like protein OS=Homo sapiens OX=9606 GN=SPATS2L PE=1 SV=2		down	1	0.825369	0.0181568		cell part;organelle part;membrane-enclosed lumen;organelle;cell;macromolecular complex					GO:0043232,intracellular non-membrane-bounded organelle;GO:0044464,cell part;GO:0044446,intracellular organelle part;GO:0070013,intracellular organelle lumen;GO:0005737,cytoplasm;GO:0043229,intracellular organelle;GO:0044424,intracellular part;GO:0043228,non-membrane-bounded organelle;GO:0043226,organelle;GO:0005634,nucleus;GO:0032991,macromolecular complex;GO:0043231,intracellular membrane-bound…
409	sp|P52732|KIF11_HUMAN	Kinesin-like protein KIF11 OS=Homo sapiens OX=9606 GN=KIF11 PE=1 SV=2		up	1	1.38639	0.01108	multicellular organismal process;cellular process;regulation of biological process;cellular component organization or biogenesis;immune system process;biological regulation;response to stimulus;metabolic process	cell part;organelle part;organelle;cell;macromolecular complex	catalytic activity;binding	Cytoskeleton ;		GO:0007596,blood coagulation;GO:0007018,microtubule-based movement;GO:0050789,regulation of biological process;GO:0008152,metabolic process;GO:0065008,regulation of biological quality;GO:0050878,regulation of body fluid levels;GO:0050817,coagulation;GO:0050794,regulation of cellular process;GO:0032501,multicellular organismal process;GO:0065007,biological regulation;GO:0009987,cellular process;GO…	GO:0044464,cell part;GO:0005875,microtubule associated complex;GO:0043232,intracellular non-membrane-bounded organelle;GO:0044446,intracellular organelle part;GO:0005737,cytoplasm;GO:0043229,intracellular organelle;GO:0043226,organelle;GO:0044424,intracellular part;GO:0043228,non-membrane-bounded organelle;GO:0005829,cytosol;GO:0005856,cytoskeleton;GO:0032991,macromolecular complex;GO:0005819,spi…	GO:0017076,purine nucleotide binding;GO:0016462,pyrophosphatase activity;GO:0016818,hydrolase activity, acting on acid anhydrides, in phosphorus-containing anhydrides;GO:0008017,microtubule binding;GO:0017111,nucleoside-triphosphatase activity;GO:0005524,ATP binding;GO:0032553,ribonucleotide binding;GO:0032559,adenyl ribonucleotide binding;GO:0003777,microtubule motor activity;GO:0001883,purine n…
410	sp|Q9Y2W1|TR150_HUMAN	Thyroid hormone receptor-associated protein 3 OS=Homo sapiens OX=9606 GN=THRAP3 PE=1 SV=2		up	1	1.30847	0.00254585	regulation of biological process;rhythmic process;response to stimulus;biological regulation;positive regulation of biological process;metabolic process;signaling;cellular process	membrane-enclosed lumen;organelle part;macromolecular complex;cell;extracellular region;organelle;extracellular region part;cell part	protein binding transcription factor activity;binding;molecular transducer activity			GO:0043170,macromolecule metabolic process;GO:0065003,macromolecular complex assembly;GO:0000956,nuclear-transcribed mRNA catabolic process;GO:0009987,cellular process;GO:0006352,transcription initiation;GO:0065004,protein-DNA complex assembly;GO:0009893,positive regulation of metabolic process;GO:0031326,regulation of cellular biosynthetic process;GO:0051173,positive regulation of nitrogen compo…	GO:0016604,nuclear body;GO:0031981,nuclear lumen;GO:0043234,protein complex;GO:0044422,organelle part;GO:0031982,vesicle;GO:0044421,extracellular region part;GO:0044451,nucleoplasm part;GO:0005622,intracellular;GO:0035145,exon-exon junction complex;GO:0044428,nuclear part;GO:0031974,membrane-enclosed lumen;GO:0016592,mediator complex;GO:0043233,organelle lumen;GO:0005623,cell;GO:0043230,extracell…	GO:0008134,transcription factor binding;GO:0000166,nucleotide binding;GO:0035257,nuclear hormone receptor binding;GO:0030374,ligand-dependent nuclear receptor transcription coactivator activity;GO:0051427,hormone receptor binding;GO:0003712,transcription cofactor activity;GO:0004872,receptor activity;GO:0004871,signal transducer activity;GO:0030528,transcription regulator activity;GO:0016563,tran…
413	sp|P60174|TPIS_HUMAN	Triosephosphate isomerase OS=Homo sapiens OX=9606 GN=TPI1 PE=1 SV=3		up	1	1.32993	0.0294654	multicellular organismal process;developmental process;metabolic process;cellular process	extracellular region;cell;organelle;extracellular region part;cell part	catalytic activity;binding	Carbohydrate transport and metabolism ;	Fructose and mannose metabolism;Glycolysis / Gluconeogenesis;Metabolic pathways;Inositol phosphate metabolism;Microbial metabolism in diverse environments	GO:0006807,nitrogen compound metabolic process;GO:0019362,pyridine nucleotide metabolic process;GO:0006739,NADP metabolic process;GO:0044238,primary metabolic process;GO:0006006,glucose metabolic process;GO:0019319,hexose biosynthetic process;GO:0019748,secondary metabolic process;GO:0009820,alkaloid metabolic process;GO:0006082,organic acid metabolic process;GO:0046165,alcohol biosynthetic proce…	GO:0005623,cell;GO:0043230,extracellular organelle;GO:0031982,vesicle;GO:0044444,cytoplasmic part;GO:0005622,intracellular;GO:0044421,extracellular region part;GO:0031988,membrane-bounded vesicle;GO:0065010,extracellular membrane-bounded organelle;GO:0043227,membrane-bounded organelle;GO:0043231,intracellular membrane-bounded organelle;GO:0005615,extracellular space;GO:0005829,cytosol;GO:0070062,…	GO:0019899,enzyme binding;GO:0005488,binding;GO:0005515,protein binding;GO:0016860,intramolecular oxidoreductase activity;GO:0031625,ubiquitin protein ligase binding;GO:0016861,intramolecular oxidoreductase activity, interconverting aldoses and ketoses;GO:0016853,isomerase activity;GO:0003824,catalytic activity	ko00010,Glycolysis / Gluconeogenesis;ko00051,Fructose and mannose metabolism;ko00562,Inositol phosphate metabolism;ko01120,Microbial metabolism in diverse environments;ko01100,Metabolic pathways
422	sp|P46777|RL5_HUMAN	60S ribosomal protein L5 OS=Homo sapiens OX=9606 GN=RPL5 PE=1 SV=3		up	1	1.47772	0.0114461	establishment of localization;metabolic process;viral reproduction;cellular component organization or biogenesis;reproduction;cellular process;reproductive process;localization	macromolecular complex;extracellular region;cell;organelle;cell part;extracellular region part;membrane-enclosed lumen;organelle part	structural molecule activity;binding	Translation, ribosomal structure and biogenesis ;	Ribosome	GO:0043284,biopolymer biosynthetic process;GO:0006396,RNA processing;GO:0022607,cellular component assembly;GO:0009069,serine family amino acid metabolic process;GO:0044248,cellular catabolic process;GO:0010467,gene expression;GO:0006415,translational termination;GO:0019752,carboxylic acid metabolic process;GO:0051234,establishment of localization;GO:0009059,macromolecule biosynthetic process;GO:…	GO:0005840,ribosome;GO:0005730,nucleolus;GO:0043227,membrane-bounded organelle;GO:0044445,cytosolic part;GO:0031988,membrane-bounded vesicle;GO:0005924,cell-substrate adherens junction;GO:0005829,cytosol;GO:0070161,anchoring junction;GO:0032991,macromolecular complex;GO:0005737,cytoplasm;GO:0015934,large ribosomal subunit;GO:0033279,ribosomal subunit;GO:0043226,organelle;GO:0044424,intracellular …	GO:0019843,rRNA binding;GO:0008097,5S rRNA binding;GO:0003735,structural constituent of ribosome;GO:0005488,binding;GO:0005515,protein binding;GO:0003676,nucleic acid binding;GO:0005198,structural molecule activity;GO:0003723,RNA binding	ko03010,Ribosome
423	sp|Q5JTH9|RRP12_HUMAN	RRP12-like protein OS=Homo sapiens OX=9606 GN=RRP12 PE=1 SV=2		up	1	1.42928	0.0170518		organelle part;cell part;membrane-enclosed lumen;organelle;cell					GO:0012505,endomembrane system;GO:0043233,organelle lumen;GO:0005623,cell;GO:0044422,organelle part;GO:0031090,organelle membrane;GO:0031981,nuclear lumen;GO:0044428,nuclear part;GO:0031974,membrane-enclosed lumen;GO:0005622,intracellular;GO:0016020,membrane;GO:0031967,organelle envelope;GO:0043231,intracellular membrane-bounded organelle;GO:0005635,nuclear envelope;GO:0043227,membrane-bounded or…
427	sp|Q5SSJ5|HP1B3_HUMAN	Heterochromatin protein 1-binding protein 3 OS=Homo sapiens OX=9606 GN=HP1BP3 PE=1 SV=1		down	1	0.706011	0.0464583	cellular process;metabolic process;regulation of biological process;cellular component organization or biogenesis;cell proliferation;response to stimulus;biological regulation	organelle part;cell part;organelle;cell;macromolecular complex	binding		Systemic lupus erythematosus	GO:0009889,regulation of biosynthetic process;GO:0051171,regulation of nitrogen compound metabolic process;GO:0019222,regulation of metabolic process;GO:0016043,cellular component organization;GO:0022607,cellular component assembly;GO:0006355,regulation of transcription, DNA-dependent;GO:0031497,chromatin assembly;GO:0010926,anatomical structure formation;GO:0010468,regulation of gene expression;…	GO:0005623,cell;GO:0005622,intracellular;GO:0005694,chromosome;GO:0044422,organelle part;GO:0032991,macromolecular complex;GO:0032993,protein-DNA complex;GO:0000786,nucleosome;GO:0043231,intracellular membrane-bounded organelle;GO:0043227,membrane-bounded organelle;GO:0044427,chromosomal part;GO:0044446,intracellular organelle part;GO:0044464,cell part;GO:0043232,intracellular non-membrane-bounde…	GO:0003682,chromatin binding;GO:0003676,nucleic acid binding;GO:0005488,binding;GO:0003677,DNA binding;GO:0031491,nucleosome binding	ko05322,Systemic lupus erythematosus
429	sp|Q15020|SART3_HUMAN	Squamous cell carcinoma antigen recognized by T-cells 3 OS=Homo sapiens OX=9606 GN=SART3 PE=1 SV=1		up	1	1.30546	0.02704	developmental process;metabolic process;biological regulation;immune system process;regulation of biological process;cellular component organization or biogenesis;cellular process;multicellular organismal process;cell proliferation	macromolecular complex;cell;organelle;membrane-enclosed lumen;cell part;organelle part	binding	General function prediction only ;	Pathogenic Escherichia coli infection	GO:0048869,cellular developmental process;GO:0000902,cell morphogenesis;GO:0044237,cellular metabolic process;GO:0019222,regulation of metabolic process;GO:0016071,mRNA metabolic process;GO:0000398,nuclear mRNA splicing, via spliceosome;GO:0016043,cellular component organization;GO:0043283,biopolymer metabolic process;GO:0048856,anatomical structure development;GO:0042592,homeostatic process;GO:0…	GO:0044422,organelle part;GO:0030529,ribonucleoprotein complex;GO:0031981,nuclear lumen;GO:0016604,nuclear body;GO:0005622,intracellular;GO:0044428,nuclear part;GO:0031974,membrane-enclosed lumen;GO:0044451,nucleoplasm part;GO:0015030,Cajal body;GO:0043233,organelle lumen;GO:0005623,cell;GO:0044424,intracellular part;GO:0005634,nucleus;GO:0043226,organelle;GO:0043229,intracellular organelle;GO:00…	GO:0042393,histone binding;GO:0000166,nucleotide binding;GO:0005515,protein binding;GO:0005488,binding;GO:0003723,RNA binding;GO:0017070,U6 snRNA binding;GO:0003676,nucleic acid binding;GO:0017069,snRNA binding	ko05130,Pathogenic Escherichia coli infection
446	sp|Q8NBS9|TXND5_HUMAN	Thioredoxin domain-containing protein 5 OS=Homo sapiens OX=9606 GN=TXNDC5 PE=1 SV=2		down	1	0.814145	0.0328868	establishment of localization;death;metabolic process;cellular component organization or biogenesis;regulation of biological process;response to stimulus;biological regulation;cellular process;localization;negative regulation of biological process	organelle;membrane-enclosed lumen;organelle part;extracellular region part;cell part;cell;extracellular region	catalytic activity;binding	Posttranslational modification, protein turnover, chaperones ; Energy production and conversion ;	Protein processing in endoplasmic reticulum	GO:0034976,response to endoplasmic reticulum stress;GO:0016044,membrane organization;GO:0010324,membrane invagination;GO:0050793,regulation of developmental process;GO:0046907,intracellular transport;GO:0051649,establishment of localization in cell;GO:0048193,Golgi vesicle transport;GO:0034960,cellular biopolymer metabolic process;GO:0044238,primary metabolic process;GO:0051179,localization;GO:00…	GO:0070062,extracellular vesicular exosome;GO:0043226,organelle;GO:0005788,endoplasmic reticulum lumen;GO:0044424,intracellular part;GO:0005737,cytoplasm;GO:0043229,intracellular organelle;GO:0044446,intracellular organelle part;GO:0005775,vacuolar lumen;GO:0070013,intracellular organelle lumen;GO:0044464,cell part;GO:0005576,extracellular region;GO:0065010,extracellular membrane-bounded organell…	GO:0016864,intramolecular oxidoreductase activity, transposing S-S bonds;GO:0016853,isomerase activity;GO:0003824,catalytic activity;GO:0016862,intramolecular oxidoreductase activity, interconverting keto- and enol-groups;GO:0003756,protein disulfide isomerase activity;GO:0016860,intramolecular oxidoreductase activity;GO:0005488,binding;GO:0005515,protein binding	ko04141,Protein processing in endoplasmic reticulum
452	sp|Q6YHK3|CD109_HUMAN	CD109 antigen OS=Homo sapiens OX=9606 GN=CD109 PE=1 SV=2		down	1	0.406684	0.00014044	metabolic process;developmental process;regulation of biological process;response to stimulus;immune system process;biological regulation;cellular process;cell proliferation;signaling;negative regulation of biological process;multicellular organismal process	extracellular region part;cell part;cell;extracellular region	enzyme regulator activity;binding	General function prediction only ;		GO:0042325,regulation of phosphorylation;GO:0048519,negative regulation of biological process;GO:0019220,regulation of phosphate metabolic process;GO:0008544,epidermis development;GO:0051246,regulation of protein metabolic process;GO:0048856,anatomical structure development;GO:0009966,regulation of signal transduction;GO:0031399,regulation of protein modification process;GO:0052548,regulation of …	GO:0044421,extracellular region part;GO:0044464,cell part;GO:0005576,extracellular region;GO:0016020,membrane;GO:0044425,membrane part;GO:0031224,intrinsic to membrane;GO:0005623,cell;GO:0005886,plasma membrane;GO:0009986,cell surface;GO:0005615,extracellular space	GO:0005488,binding;GO:0005515,protein binding;GO:0004857,enzyme inhibitor activity;GO:0019838,growth factor binding;GO:0050431,transforming growth factor beta binding;GO:0004866,endopeptidase inhibitor activity;GO:0030234,enzyme regulator activity;GO:0030414,peptidase inhibitor activity;GO:0019955,cytokine binding
456	sp|P22087|FBRL_HUMAN	rRNA 2'-O-methyltransferase fibrillarin OS=Homo sapiens OX=9606 GN=FBL PE=1 SV=2		up	1	1.69671	0.0143972	cellular component organization or biogenesis;localization;multicellular organismal process;cellular process;developmental process;metabolic process	extracellular region;cell;macromolecular complex;cell part;extracellular region part;organelle;organelle part;membrane-enclosed lumen	catalytic activity;binding	Translation, ribosomal structure and biogenesis ;		GO:0044238,primary metabolic process;GO:0034960,cellular biopolymer metabolic process;GO:0060348,bone development;GO:0051179,localization;GO:0006730,one-carbon metabolic process;GO:0034470,ncRNA processing;GO:0006807,nitrogen compound metabolic process;GO:0043412,biopolymer modification;GO:0009451,RNA modification;GO:0043414,biopolymer methylation;GO:0033036,macromolecule localization;GO:0044085,…	GO:0015030,Cajal body;GO:0005623,cell;GO:0043230,extracellular organelle;GO:0043233,organelle lumen;GO:0031982,vesicle;GO:0030529,ribonucleoprotein complex;GO:0044451,nucleoplasm part;GO:0044428,nuclear part;GO:0043231,intracellular membrane-bounded organelle;GO:0031428,box C/D snoRNP complex;GO:0065010,extracellular membrane-bounded organelle;GO:0044452,nucleolar part;GO:0043229,intracellular or…	GO:0019899,enzyme binding;GO:0005488,binding;GO:0005515,protein binding;GO:0008173,RNA methyltransferase activity;GO:0016741,transferase activity, transferring one-carbon groups;GO:0008168,methyltransferase activity;GO:0051117,ATPase binding;GO:0008757,S-adenosylmethionine-dependent methyltransferase activity;GO:0016740,transferase activity;GO:0003824,catalytic activity
457	sp|Q15084|PDIA6_HUMAN	Protein disulfide-isomerase A6 OS=Homo sapiens OX=9606 GN=PDIA6 PE=1 SV=1		down	1	0.661031	0.0231091	biological adhesion;cellular process;metabolic process;regulation of biological process;response to stimulus;multicellular organismal process;biological regulation	extracellular region part;cell part;organelle;macromolecular complex;cell;extracellular region;organelle part;membrane-enclosed lumen	catalytic activity;binding	Posttranslational modification, protein turnover, chaperones ; Energy production and conversion ;	Protein processing in endoplasmic reticulum	GO:0044237,cellular metabolic process;GO:0019725,cellular homeostasis;GO:0007599,hemostasis;GO:0043283,biopolymer metabolic process;GO:0042592,homeostatic process;GO:0050896,response to stimulus;GO:0042060,wound healing;GO:0006457,protein folding;GO:0044260,cellular macromolecule metabolic process;GO:0070527,platelet aggregation;GO:0009605,response to external stimulus;GO:0006950,response to stre…	GO:0034663,endoplasmic reticulum chaperone complex;GO:0044444,cytoplasmic part;GO:0031090,organelle membrane;GO:0031982,vesicle;GO:0005886,plasma membrane;GO:0005623,cell;GO:0043230,extracellular organelle;GO:0043233,organelle lumen;GO:0012505,endomembrane system;GO:0005576,extracellular region;GO:0016023,cytoplasmic membrane-bounded vesicle;GO:0043229,intracellular organelle;GO:0070062,extracell…	GO:0016864,intramolecular oxidoreductase activity, transposing S-S bonds;GO:0016853,isomerase activity;GO:0003824,catalytic activity;GO:0016862,intramolecular oxidoreductase activity, interconverting keto- and enol-groups;GO:0003756,protein disulfide isomerase activity;GO:0016860,intramolecular oxidoreductase activity;GO:0005488,binding;GO:0005515,protein binding	ko04141,Protein processing in endoplasmic reticulum
462	sp|Q68CZ2|TENS3_HUMAN	Tensin-3 OS=Homo sapiens OX=9606 GN=TNS3 PE=1 SV=2		down	1	0.761133	0.0390951	biological regulation;regulation of biological process;positive regulation of biological process;developmental process;locomotion;multicellular organismal process;localization;cell proliferation;cellular process	cell;cell part	binding	Signal transduction mechanisms ;	Fatty acid biosynthesis;Prostate cancer;Tight junction;Pathways in cancer;Glioma;Focal adhesion;Small cell lung cancer;Melanoma;Inositol phosphate metabolism;p53 signaling pathway;Metabolic pathways;Phosphatidylinositol signaling system;Endometrial cancer;Insulin signaling pathway	GO:0060541,respiratory system development;GO:0048522,positive regulation of cellular process;GO:0035295,tube development;GO:0048513,organ development;GO:0008284,positive regulation of cell proliferation;GO:0006928,cell motion;GO:0040011,locomotion;GO:0051179,localization;GO:0032502,developmental process;GO:0016477,cell migration;GO:0048870,cell motility;GO:0048518,positive regulation of biologica…	GO:0005924,cell-substrate adherens junction;GO:0030055,cell-substrate junction;GO:0070161,anchoring junction;GO:0005737,cytoplasm;GO:0044425,membrane part;GO:0005925,focal adhesion;GO:0005912,adherens junction;GO:0044424,intracellular part;GO:0044464,cell part;GO:0044459,plasma membrane part;GO:0016323,basolateral plasma membrane;GO:0005886,plasma membrane;GO:0005623,cell;GO:0030054,cell junction…	GO:0005515,protein binding;GO:0005488,binding	ko04510,Focal adhesion;ko05215,Prostate cancer;ko05222,Small cell lung cancer;ko04910,Insulin signaling pathway;ko00061,Fatty acid biosynthesis;ko04530,Tight junction;ko04115,p53 signaling pathway;ko00562,Inositol phosphate metabolism;ko05218,Melanoma;ko05213,Endometrial cancer;ko05214,Glioma;ko05200,Pathways in cancer;ko01100,Metabolic pathways;ko04070,Phosphatidylinositol signaling system
463	sp|O60568|PLOD3_HUMAN	Multifunctional procollagen lysine hydroxylase and glycosyltransferase LH3 OS=Homo sapiens OX=9606 GN=PLOD3 PE=1 SV=1		down	1	0.790895	0.00369934	cellular process;multicellular organismal process;localization;metabolic process;developmental process;response to stimulus;biological regulation;cellular component organization or biogenesis	extracellular region;cell;organelle;organelle part;cell part;extracellular region part	catalytic activity;binding		Lysine degradation	GO:0060541,respiratory system development;GO:0030198,extracellular matrix organization;GO:0008015,blood circulation;GO:0035295,tube development;GO:0022607,cellular component assembly;GO:0009790,embryonic development;GO:0003018,vascular process in circulatory system;GO:0009792,embryonic development ending in birth or egg hatching;GO:0007399,nervous system development;GO:0051716,cellular response t…	GO:0044421,extracellular region part;GO:0005783,endoplasmic reticulum;GO:0016020,membrane;GO:0005622,intracellular;GO:0044422,organelle part;GO:0044432,endoplasmic reticulum part;GO:0044464,cell part;GO:0044446,intracellular organelle part;GO:0005791,rough endoplasmic reticulum;GO:0005737,cytoplasm;GO:0044424,intracellular part;GO:0043226,organelle;GO:0044425,membrane part;GO:0042175,nuclear enve…	GO:0016705,oxidoreductase activity, acting on paired donors, with incorporation or reduction of molecular oxygen;GO:0008475,procollagen-lysine 5-dioxygenase activity;GO:0046914,transition metal ion binding;GO:0005506,iron ion binding;GO:0016706,oxidoreductase activity, acting on paired donors, with incorporation or reduction of molecular oxygen, 2-oxoglutarate as one donor, and incorporation of o…	ko00310,Lysine degradation
468	sp|Q16555|DPYL2_HUMAN	Dihydropyrimidinase-related protein 2 OS=Homo sapiens OX=9606 GN=DPYSL2 PE=1 SV=1		down	1	0.627324	0.013294	regulation of biological process;growth;cellular component organization or biogenesis;biological regulation;response to stimulus;metabolic process;developmental process;establishment of localization;positive regulation of biological process;localization;multicellular organismal process;locomotion;signaling;cellular process	synapse;macromolecular complex;cell;extracellular region;organelle;extracellular region part;cell part;synapse part;organelle part	catalytic activity;binding	Nucleotide transport and metabolism ;	Axon guidance	GO:0051179,localization;GO:0030030,cell projection organization;GO:0016044,membrane organization;GO:0010324,membrane invagination;GO:0050793,regulation of developmental process;GO:0051239,regulation of multicellular organismal process;GO:0051046,regulation of secretion;GO:0006996,organelle organization;GO:0014070,response to organic cyclic substance;GO:0010769,regulation of cell morphogenesis inv…	GO:0005623,cell;GO:0005886,plasma membrane;GO:0043230,extracellular organelle;GO:0030427,site of polarized growth;GO:0043025,cell soma;GO:0044444,cytoplasmic part;GO:0031982,vesicle;GO:0005856,cytoskeleton;GO:0042995,cell projection;GO:0065010,extracellular membrane-bounded organelle;GO:0043209,myelin sheath;GO:0043231,intracellular membrane-bounded organelle;GO:0044459,plasma membrane part;GO:00…	GO:0016810,hydrolase activity, acting on carbon-nitrogen (but not peptide) bonds;GO:0003824,catalytic activity;GO:0008017,microtubule binding;GO:0016787,hydrolase activity;GO:0015631,tubulin binding;GO:0008092,cytoskeletal protein binding;GO:0019901,protein kinase binding;GO:0019900,kinase binding;GO:0019899,enzyme binding;GO:0005488,binding;GO:0005515,protein binding	ko04360,Axon guidance
469	sp|Q9Y266|NUDC_HUMAN	Nuclear migration protein nudC OS=Homo sapiens OX=9606 GN=NUDC PE=1 SV=1		up	1	1.63972	0.00265719	cellular process;cell proliferation;signaling;multicellular organismal process;developmental process;regulation of biological process;cellular component organization or biogenesis;response to stimulus;biological regulation	cell part;organelle part;membrane-enclosed lumen;organelle;cell;macromolecular complex	binding			GO:0032502,developmental process;GO:0000278,mitotic cell cycle;GO:0000090,mitotic anaphase;GO:0007154,cell communication;GO:0051322,anaphase;GO:0007049,cell cycle;GO:0000910,cytokinesis;GO:0048285,organelle fission;GO:0000280,nuclear division;GO:0006996,organelle organization;GO:0009987,cellular process;GO:0032501,multicellular organismal process;GO:0007242,intracellular signaling cascade;GO:0065…	GO:0031974,membrane-enclosed lumen;GO:0044444,cytoplasmic part;GO:0044428,nuclear part;GO:0005622,intracellular;GO:0044430,cytoskeletal part;GO:0044422,organelle part;GO:0005874,microtubule;GO:0031981,nuclear lumen;GO:0005623,cell;GO:0043233,organelle lumen;GO:0015630,microtubule cytoskeleton;GO:0044446,intracellular organelle part;GO:0070013,intracellular organelle lumen;GO:0044464,cell part;GO:…	GO:0005488,binding;GO:0005515,protein binding
483	sp|P48634|PRC2A_HUMAN	Protein PRRC2A OS=Homo sapiens OX=9606 GN=PRRC2A PE=1 SV=3		up	1	1.41453	0.0173932		cell;extracellular region;extracellular region part;cell part;organelle	binding				GO:0044464,cell part;GO:0005576,extracellular region;GO:0005737,cytoplasm;GO:0043229,intracellular organelle;GO:0070062,extracellular vesicular exosome;GO:0043226,organelle;GO:0044424,intracellular part;GO:0043227,membrane-bounded organelle;GO:0043231,intracellular membrane-bounded organelle;GO:0065010,extracellular membrane-bounded organelle;GO:0031988,membrane-bounded vesicle;GO:0016020,membran…	GO:0005488,binding;GO:0005515,protein binding
487	sp|A6NHR9|SMHD1_HUMAN	Structural maintenance of chromosomes flexible hinge domain-containing protein 1 OS=Homo sapiens OX=9606 GN=SMCHD1 PE=1 SV=2		down	1	0.78402	0.0136639	biological regulation;regulation of biological process;cellular component organization or biogenesis;metabolic process;cellular process	cell;organelle part;cell part;membrane-enclosed lumen;organelle	binding			GO:0051276,chromosome organization;GO:0006996,organelle organization;GO:0009987,cellular process;GO:0016043,cellular component organization	GO:0044454,nuclear chromosome part;GO:0044422,organelle part;GO:0005694,chromosome;GO:0000784,nuclear chromosome, telomeric region;GO:0005720,nuclear heterochromatin;GO:0005622,intracellular;GO:0044428,nuclear part;GO:0000781,chromosome, telomeric region;GO:0005623,cell;GO:0000790,nuclear chromatin;GO:0000792,heterochromatin;GO:0000785,chromatin;GO:0043226,organelle;GO:0005634,nucleus;GO:0043228,…	GO:0017076,purine nucleotide binding;GO:0005524,ATP binding;GO:0032553,ribonucleotide binding;GO:0032555,purine ribonucleotide binding;GO:0032559,adenyl ribonucleotide binding;GO:0001882,nucleoside binding;GO:0000166,nucleotide binding;GO:0030554,adenyl nucleotide binding;GO:0001883,purine nucleoside binding;GO:0005488,binding
489	sp|O94776|MTA2_HUMAN	Metastasis-associated protein MTA2 OS=Homo sapiens OX=9606 GN=MTA2 PE=1 SV=1		up	1	1.68536	0.0205592	localization;negative regulation of biological process;locomotion;cellular process;regulation of biological process;cellular component organization or biogenesis;biological regulation;metabolic process;positive regulation of biological process	organelle part;cell part;membrane-enclosed lumen;organelle;cell;macromolecular complex	protein binding transcription factor activity;binding;nucleic acid binding transcription factor activity;catalytic activity			GO:0045449,regulation of transcription;GO:0006333,chromatin assembly or disassembly;GO:0006338,chromatin remodeling;GO:0045944,positive regulation of transcription from RNA polymerase II promoter;GO:0016569,covalent chromatin modification;GO:0010558,negative regulation of macromolecule biosynthetic process;GO:0044238,primary metabolic process;GO:0045892,negative regulation of transcription, DNA-d…	GO:0005694,chromosome;GO:0005667,transcription factor complex;GO:0043234,protein complex;GO:0044454,nuclear chromosome part;GO:0044422,organelle part;GO:0031981,nuclear lumen;GO:0031974,membrane-enclosed lumen;GO:0044428,nuclear part;GO:0005622,intracellular;GO:0016020,membrane;GO:0044451,nucleoplasm part;GO:0043233,organelle lumen;GO:0000790,nuclear chromatin;GO:0005623,cell;GO:0044424,intracell…	GO:0042826,histone deacetylase binding;GO:0008270,zinc ion binding;GO:0019899,enzyme binding;GO:0003677,DNA binding;GO:0003700,transcription factor activity;GO:0043169,cation binding;GO:0046914,transition metal ion binding;GO:0031491,nucleosome binding;GO:0016787,hydrolase activity;GO:0003824,catalytic activity;GO:0016810,hydrolase activity, acting on carbon-nitrogen (but not peptide) bonds;GO:00…
492	sp|P60228|EIF3E_HUMAN	Eukaryotic translation initiation factor 3 subunit E OS=Homo sapiens OX=9606 GN=EIF3E PE=1 SV=1		up	1	1.43061	0.0411487	biological regulation;negative regulation of biological process;cellular component organization or biogenesis;regulation of biological process;metabolic process;cellular process	membrane-enclosed lumen;organelle part;macromolecular complex;cell;extracellular region;organelle;cell part;extracellular region part	binding		RNA transport;Hepatitis C	GO:0034962,cellular biopolymer catabolic process;GO:0010556,regulation of macromolecule biosynthetic process;GO:0006417,regulation of translation;GO:0010558,negative regulation of macromolecule biosynthetic process;GO:0044238,primary metabolic process;GO:0034960,cellular biopolymer metabolic process;GO:0006402,mRNA catabolic process;GO:0044085,cellular component biogenesis;GO:0006807,nitrogen com…	GO:0044427,chromosomal part;GO:0043227,membrane-bounded organelle;GO:0031988,membrane-bounded vesicle;GO:0005654,nucleoplasm;GO:0005829,cytosol;GO:0032991,macromolecular complex;GO:0005737,cytoplasm;GO:0043226,organelle;GO:0000785,chromatin;GO:0044424,intracellular part;GO:0044464,cell part;GO:0070013,intracellular organelle lumen;GO:0044446,intracellular organelle part;GO:0016605,PML body;GO:001…	GO:0047485,protein N-terminus binding;GO:0008135,translation factor activity, nucleic acid binding;GO:0045182,translation regulator activity;GO:0003676,nucleic acid binding;GO:0003743,translation initiation factor activity;GO:0005515,protein binding;GO:0005488,binding	ko03013,RNA transport;ko05160,Hepatitis C
493	sp|O60664|PLIN3_HUMAN	Perilipin-3 OS=Homo sapiens OX=9606 GN=PLIN3 PE=1 SV=3		down	1	0.738707	0.0189399	establishment of localization;cellular process;localization	cell;organelle;cell part;organelle part	binding		PPAR signaling pathway	GO:0051179,localization;GO:0016192,vesicle-mediated transport;GO:0051234,establishment of localization;GO:0006810,transport;GO:0009987,cellular process	GO:0005623,cell;GO:0005768,endosome;GO:0005622,intracellular;GO:0044444,cytoplasmic part;GO:0005794,Golgi apparatus;GO:0016020,membrane;GO:0044422,organelle part;GO:0031090,organelle membrane;GO:0005811,lipid particle;GO:0010008,endosome membrane;GO:0043231,intracellular membrane-bounded organelle;GO:0043227,membrane-bounded organelle;GO:0044446,intracellular organelle part;GO:0044440,endosomal p…	GO:0005488,binding;GO:0005515,protein binding	ko03320,PPAR signaling pathway
505	sp|P29692|EF1D_HUMAN	Elongation factor 1-delta OS=Homo sapiens OX=9606 GN=EEF1D PE=1 SV=5		up	1	1.5578	0.000274573	cellular process;signaling;death;metabolic process;positive regulation of biological process;regulation of biological process;biological regulation;response to stimulus	cell;macromolecular complex;cell part;organelle part;membrane-enclosed lumen;organelle	binding;molecular transducer activity	Translation, ribosomal structure and biogenesis ;		GO:0008152,metabolic process;GO:0048518,positive regulation of biological process;GO:0050789,regulation of biological process;GO:0009299,mRNA transcription;GO:0044267,cellular protein metabolic process;GO:0019219,regulation of nucleobase, nucleoside, nucleotide and nucleic acid metabolic process;GO:0016070,RNA metabolic process;GO:0009987,cellular process;GO:0065007,biological regulation;GO:00431…	GO:0005623,cell;GO:0043233,organelle lumen;GO:0043234,protein complex;GO:0044422,organelle part;GO:0031981,nuclear lumen;GO:0044444,cytoplasmic part;GO:0044428,nuclear part;GO:0031974,membrane-enclosed lumen;GO:0005622,intracellular;GO:0005783,endoplasmic reticulum;GO:0043227,membrane-bounded organelle;GO:0043231,intracellular membrane-bounded organelle;GO:0005730,nucleolus;GO:0032991,macromolecu…	GO:0031072,heat shock protein binding;GO:0004871,signal transducer activity;GO:0003676,nucleic acid binding;GO:0003677,DNA binding;GO:0005515,protein binding;GO:0005488,binding;GO:0008135,translation factor activity, nucleic acid binding;GO:0060089,molecular transducer activity;GO:0045182,translation regulator activity;GO:0003746,translation elongation factor activity
508	sp|P27797|CALR_HUMAN	Calreticulin OS=Homo sapiens OX=9606 GN=CALR PE=1 SV=1		down	1	0.594755	7.86392e-05	immune system process;response to stimulus;positive regulation of biological process;establishment of localization;locomotion;cell proliferation;cellular process;biological regulation;reproduction;cellular component organization or biogenesis;regulation of biological process;metabolic process;developmental process;death;negative regulation of biological process;multicellular organismal process;si…	membrane-enclosed lumen;organelle part;organelle;extracellular region part;cell part;macromolecular complex;extracellular region;cell	binding		Antigen processing and presentation;Protein processing in endoplasmic reticulum;Chagas disease;Phagosome	GO:0045934,negative regulation of nucleobase, nucleoside, nucleotide and nucleic acid metabolic process;GO:0051049,regulation of transport;GO:0048856,anatomical structure development;GO:0048519,negative regulation of biological process;GO:0035051,cardiac cell differentiation;GO:0043283,biopolymer metabolic process;GO:0031328,positive regulation of cellular biosynthetic process;GO:0050821,protein …	GO:0005925,focal adhesion;GO:0044425,membrane part;GO:0016528,sarcoplasm;GO:0044424,intracellular part;GO:0043226,organelle;GO:0005737,cytoplasm;GO:0044446,intracellular organelle part;GO:0070013,intracellular organelle lumen;GO:0044464,cell part;GO:0005924,cell-substrate adherens junction;GO:0031988,membrane-bounded vesicle;GO:0031410,cytoplasmic vesicle;GO:0005615,extracellular space;GO:0043227…	GO:0046872,metal ion binding;GO:0005102,receptor binding;GO:0005488,binding;GO:0005515,protein binding;GO:0005509,calcium ion binding;GO:0003676,nucleic acid binding;GO:0043167,ion binding;GO:0051082,unfolded protein binding;GO:0051087,chaperone binding;GO:0042562,hormone binding;GO:0003677,DNA binding;GO:0003729,mRNA binding;GO:0019899,enzyme binding;GO:0035258,steroid hormone receptor binding;G…	ko04145,Phagosome;ko05142,Chagas disease;ko04612,Antigen processing and presentation;ko04141,Protein processing in endoplasmic reticulum
510	sp|P04844|RPN2_HUMAN	Dolichyl-diphosphooligosaccharide--protein glycosyltransferase subunit 2 OS=Homo sapiens OX=9606 GN=RPN2 PE=1 SV=3		down	1	0.71859	0.0093038	metabolic process;developmental process;establishment of localization;cellular process;response to stimulus;localization	cell;macromolecular complex;organelle;cell part;organelle part	catalytic activity;binding		N-Glycan biosynthesis;Protein processing in endoplasmic reticulum;Metabolic pathways	GO:0018193,peptidyl-amino acid modification;GO:0006412,translation;GO:0042493,response to drug;GO:0005975,carbohydrate metabolic process;GO:0070085,glycosylation;GO:0032502,developmental process;GO:0050896,response to stimulus;GO:0007568,aging;GO:0009059,macromolecule biosynthetic process;GO:0044262,cellular carbohydrate metabolic process;GO:0018196,peptidyl-asparagine modification;GO:0051234,est…	GO:0031224,intrinsic to membrane;GO:0044425,membrane part;GO:0005634,nucleus;GO:0044424,intracellular part;GO:0043226,organelle;GO:0005737,cytoplasm;GO:0008250,oligosaccharyltransferase complex;GO:0043229,intracellular organelle;GO:0005791,rough endoplasmic reticulum;GO:0044446,intracellular organelle part;GO:0044464,cell part;GO:0043231,intracellular membrane-bounded organelle;GO:0043227,membran…	GO:0043021,ribonucleoprotein binding;GO:0004579,dolichyl-diphosphooligosaccharide-protein glycotransferase activity;GO:0016758,transferase activity, transferring hexosyl groups;GO:0016757,transferase activity, transferring glycosyl groups;GO:0004576,oligosaccharyl transferase activity;GO:0016740,transferase activity;GO:0043022,ribosome binding;GO:0003824,catalytic activity;GO:0005515,protein bind…	ko00510,N-Glycan biosynthesis;ko04141,Protein processing in endoplasmic reticulum;ko01100,Metabolic pathways
533	sp|P05388|RLA0_HUMAN	60S acidic ribosomal protein P0 OS=Homo sapiens OX=9606 GN=RPLP0 PE=1 SV=1		up	1	1.43543	0.0457998	cellular process;reproductive process;localization;metabolic process;establishment of localization;viral reproduction;reproduction;cellular component organization or biogenesis	organelle part;cell part;extracellular region part;organelle;macromolecular complex;extracellular region;cell	structural molecule activity;binding	Translation, ribosomal structure and biogenesis ;	Ribosome	GO:0019058,viral infectious cycle;GO:0034645,cellular macromolecule biosynthetic process;GO:0043285,biopolymer catabolic process;GO:0043283,biopolymer metabolic process;GO:0009057,macromolecule catabolic process;GO:0009308,amine metabolic process;GO:0022415,viral reproductive process;GO:0006519,cellular amino acid and derivative metabolic process;GO:0016071,mRNA metabolic process;GO:0006401,RNA c…	GO:0044422,organelle part;GO:0044421,extracellular region part;GO:0016020,membrane;GO:0005622,intracellular;GO:0022626,cytosolic ribosome;GO:0005737,cytoplasm;GO:0015934,large ribosomal subunit;GO:0033279,ribosomal subunit;GO:0043226,organelle;GO:0044424,intracellular part;GO:0044425,membrane part;GO:0005925,focal adhesion;GO:0044464,cell part;GO:0044446,intracellular organelle part;GO:0005840,ri…	GO:0003735,structural constituent of ribosome;GO:0005198,structural molecule activity;GO:0005488,binding;GO:0005515,protein binding	ko03010,Ribosome
536	sp|P05362|ICAM1_HUMAN	Intercellular adhesion molecule 1 OS=Homo sapiens OX=9606 GN=ICAM1 PE=1 SV=2		down	1	0.629168	7.61668e-06	biological adhesion;death;metabolic process;developmental process;reproduction;regulation of biological process;cellular component organization or biogenesis;rhythmic process;viral reproduction;biological regulation;localization;signaling;reproductive process;multi-organism process;negative regulation of biological process;multicellular organismal process;positive regulation of biological process…	organelle;cell part;extracellular region part;extracellular region;cell	molecular transducer activity;binding		Viral myocarditis;Malaria;Leukocyte transendothelial migration;Staphylococcus aureus infection;Cell adhesion molecules (CAMs);Natural killer cell mediated cytotoxicity	GO:0008585,female gonad development;GO:0043410,positive regulation of MAPKKK cascade;GO:0019222,regulation of metabolic process;GO:0051828,entry into other organism during symbiotic interaction;GO:0051171,regulation of nitrogen compound metabolic process;GO:0051701,interaction with host;GO:0051716,cellular response to stimulus;GO:0045137,development of primary sexual characteristics;GO:0051246,re…	GO:0009986,cell surface;GO:0016323,basolateral plasma membrane;GO:0005623,cell;GO:0005886,plasma membrane;GO:0043230,extracellular organelle;GO:0030054,cell junction;GO:0005887,integral to plasma membrane;GO:0045121,membrane raft;GO:0031982,vesicle;GO:0016020,membrane;GO:0044421,extracellular region part;GO:0005615,extracellular space;GO:0043227,membrane-bounded organelle;GO:0005924,cell-substrat…	GO:0004871,signal transducer activity;GO:0005178,integrin binding;GO:0032403,protein complex binding;GO:0005102,receptor binding;GO:0005515,protein binding;GO:0004888,transmembrane receptor activity;GO:0005488,binding;GO:0060089,molecular transducer activity;GO:0001618,viral receptor activity;GO:0004872,receptor activity	ko05150,Staphylococcus aureus infection;ko04650,Natural killer cell mediated cytotoxicity;ko05144,Malaria;ko04514,Cell adhesion molecules (CAMs);ko05416,Viral myocarditis;ko04670,Leukocyte transendothelial migration
541	sp|Q9BY44|EIF2A_HUMAN	Eukaryotic translation initiation factor 2A OS=Homo sapiens OX=9606 GN=EIF2A PE=1 SV=3		up	1	1.23958	0.0182802	signaling;cellular process;cellular component organization or biogenesis;regulation of biological process;response to stimulus;biological regulation;positive regulation of biological process;metabolic process	extracellular region part;cell part;cell;extracellular region;macromolecular complex	binding	General function prediction only ;	RNA transport	GO:0044267,cellular protein metabolic process;GO:0043933,macromolecular complex subunit organization;GO:0006464,protein modification process;GO:0008152,metabolic process;GO:0048518,positive regulation of biological process;GO:0042254,ribosome biogenesis;GO:0050789,regulation of biological process;GO:0034621,cellular macromolecular complex subunit organization;GO:0019538,protein metabolic process;…	GO:0043234,protein complex;GO:0044424,intracellular part;GO:0005737,cytoplasm;GO:0044444,cytoplasmic part;GO:0005622,intracellular;GO:0044464,cell part;GO:0005623,cell;GO:0032991,macromolecular complex	GO:0008135,translation factor activity, nucleic acid binding;GO:0043022,ribosome binding;GO:0000049,tRNA binding;GO:0045182,translation regulator activity;GO:0003743,translation initiation factor activity;GO:0043021,ribonucleoprotein binding;GO:0003723,RNA binding;GO:0003676,nucleic acid binding;GO:0005515,protein binding;GO:0005488,binding	ko03013,RNA transport
548	sp|P78406|RAE1L_HUMAN	mRNA export factor OS=Homo sapiens OX=9606 GN=RAE1 PE=1 SV=1		up	1	1.27997	0.0197265	cellular process;reproductive process;signaling;multi-organism process;negative regulation of biological process;localization;establishment of localization;metabolic process;viral reproduction;response to stimulus;biological regulation;reproduction;regulation of biological process;cellular component organization or biogenesis	cell;macromolecular complex;membrane-enclosed lumen;organelle;organelle part;cell part	binding	General function prediction only ;	RNA transport	GO:0022415,viral reproductive process;GO:0032879,regulation of localization;GO:0034645,cellular macromolecule biosynthetic process;GO:0044068,modulation by symbiont of host cellular process;GO:0019058,viral infectious cycle;GO:0051049,regulation of transport;GO:0048519,negative regulation of biological process;GO:0043283,biopolymer metabolic process;GO:0051701,interaction with host;GO:0044249,cel…	GO:0032991,macromolecular complex;GO:0005635,nuclear envelope;GO:0043227,membrane-bounded organelle;GO:0005730,nucleolus;GO:0031967,organelle envelope;GO:0044464,cell part;GO:0031975,envelope;GO:0044446,intracellular organelle part;GO:0070013,intracellular organelle lumen;GO:0005737,cytoplasm;GO:0044425,membrane part;GO:0043226,organelle;GO:0044424,intracellular part;GO:0016020,membrane;GO:003197…	GO:0008017,microtubule binding;GO:0003676,nucleic acid binding;GO:0015631,tubulin binding;GO:0003723,RNA binding;GO:0005515,protein binding;GO:0005488,binding;GO:0008092,cytoskeletal protein binding	ko03013,RNA transport
553	sp|Q9Y617|SERC_HUMAN	Phosphoserine aminotransferase OS=Homo sapiens OX=9606 GN=PSAT1 PE=1 SV=2		down	1	0.618054	0.00641987	metabolic process;cellular process	extracellular region part;cell part;organelle;cell;extracellular region	catalytic activity	Coenzyme transport and metabolism ; Amino acid transport and metabolism ;	Glycine, serine and threonine metabolism;Metabolic pathways;Vitamin B6 metabolism;Microbial metabolism in diverse environments	GO:0006807,nitrogen compound metabolic process;GO:0009069,serine family amino acid metabolic process;GO:0008652,cellular amino acid biosynthetic process;GO:0044262,cellular carbohydrate metabolic process;GO:0019752,carboxylic acid metabolic process;GO:0005975,carbohydrate metabolic process;GO:0044238,primary metabolic process;GO:0016053,organic acid biosynthetic process;GO:0043436,oxoacid metabol…	GO:0005576,extracellular region;GO:0044464,cell part;GO:0044424,intracellular part;GO:0043226,organelle;GO:0070062,extracellular vesicular exosome;GO:0005737,cytoplasm;GO:0005829,cytosol;GO:0065010,extracellular membrane-bounded organelle;GO:0031988,membrane-bounded vesicle;GO:0043227,membrane-bounded organelle;GO:0005622,intracellular;GO:0044444,cytoplasmic part;GO:0044421,extracellular region p…	GO:0008483,transaminase activity;GO:0016769,transferase activity, transferring nitrogenous groups;GO:0003824,catalytic activity;GO:0016740,transferase activity	ko00260,Glycine, serine and threonine metabolism;ko01100,Metabolic pathways;ko01120,Microbial metabolism in diverse environments;ko00750,Vitamin B6 metabolism
556	sp|Q03169|TNAP2_HUMAN	Tumor necrosis factor alpha-induced protein 2 OS=Homo sapiens OX=9606 GN=TNFAIP2 PE=1 SV=2		down	1	0.492412	0.000442556	cellular process;developmental process;establishment of localization;localization;multicellular organismal process	macromolecular complex;extracellular region;cell;extracellular region part;cell part	binding		Tight junction	GO:0048514,blood vessel morphogenesis;GO:0051649,establishment of localization in cell;GO:0016192,vesicle-mediated transport;GO:0001525,angiogenesis;GO:0048513,organ development;GO:0009887,organ morphogenesis;GO:0051234,establishment of localization;GO:0034629,cellular protein complex localization;GO:0032502,developmental process;GO:0051179,localization;GO:0010926,anatomical structure formation;G…	GO:0005938,cell cortex;GO:0005615,extracellular space;GO:0032991,macromolecular complex;GO:0005623,cell;GO:0044424,intracellular part;GO:0043234,protein complex;GO:0005737,cytoplasm;GO:0005622,intracellular;GO:0044444,cytoplasmic part;GO:0044421,extracellular region part;GO:0044448,cell cortex part;GO:0044464,cell part;GO:0005576,extracellular region	GO:0005515,protein binding;GO:0005488,binding;GO:0000149,SNARE binding	ko04530,Tight junction
558	sp|P19525|E2AK2_HUMAN	Interferon-induced, double-stranded RNA-activated protein kinase OS=Homo sapiens OX=9606 GN=EIF2AK2 PE=1 SV=2		down	1	0.505475	0.000343246	cell proliferation;cellular process;immune system process;response to stimulus;positive regulation of biological process;negative regulation of biological process;multicellular organismal process;signaling;multi-organism process;reproductive process;biological regulation;viral reproduction;regulation of biological process;reproduction;metabolic process;death	cell part;organelle;macromolecular complex;cell	binding;enzyme regulator activity;catalytic activity	General function prediction only ; Signal transduction mechanisms ; Transcription ; Replication, recombination and repair ;	Protein processing in endoplasmic reticulum;Alzheimer's disease;Hepatitis C	GO:0043330,response to exogenous dsRNA;GO:0009267,cellular response to starvation;GO:0042325,regulation of phosphorylation;GO:0009967,positive regulation of signal transduction;GO:0051817,modification of morphology or physiology of other organism during symbiotic interaction;GO:0007242,intracellular signaling cascade;GO:0006984,ER-nuclear signaling pathway;GO:0009890,negative regulation of biosyn…	GO:0030529,ribonucleoprotein complex;GO:0005622,intracellular;GO:0044444,cytoplasmic part;GO:0016020,membrane;GO:0005623,cell;GO:0043226,organelle;GO:0044424,intracellular part;GO:0005634,nucleus;GO:0043228,non-membrane-bounded organelle;GO:0043229,intracellular organelle;GO:0005737,cytoplasm;GO:0044464,cell part;GO:0043232,intracellular non-membrane-bounded organelle;GO:0005840,ribosome;GO:00484…	GO:0004672,protein kinase activity;GO:0019208,phosphatase regulator activity;GO:0032559,adenyl ribonucleotide binding;GO:0003723,RNA binding;GO:0016773,phosphotransferase activity, alcohol group as acceptor;GO:0000166,nucleotide binding;GO:0019888,protein phosphatase regulator activity;GO:0001883,purine nucleoside binding;GO:0004674,protein serine/threonine kinase activity;GO:0004713,protein tyro…	ko05160,Hepatitis C;ko04141,Protein processing in endoplasmic reticulum;ko05010,Alzheimer's disease
562	sp|P07195|LDHB_HUMAN	L-lactate dehydrogenase B chain OS=Homo sapiens OX=9606 GN=LDHB PE=1 SV=2		up	1	1.78056	0.00660129	metabolic process;cellular process	organelle;cell part;extracellular region part;extracellular region;cell	catalytic activity;binding	Energy production and conversion ;	Microbial metabolism in diverse environments;Propanoate metabolism;Glycolysis / Gluconeogenesis;Metabolic pathways;Cysteine and methionine metabolism;Pyruvate metabolism	GO:0032787,monocarboxylic acid metabolic process;GO:0055086,nucleobase, nucleoside and nucleotide metabolic process;GO:0044237,cellular metabolic process;GO:0006090,pyruvate metabolic process;GO:0055114,oxidation reduction;GO:0008152,metabolic process;GO:0006766,vitamin metabolic process;GO:0042180,cellular ketone metabolic process;GO:0006733,oxidoreduction coenzyme metabolic process;GO:0006767,w…	GO:0005829,cytosol;GO:0031988,membrane-bounded vesicle;GO:0065010,extracellular membrane-bounded organelle;GO:0043231,intracellular membrane-bounded organelle;GO:0043227,membrane-bounded organelle;GO:0043209,myelin sheath;GO:0044459,plasma membrane part;GO:0005576,extracellular region;GO:0044464,cell part;GO:0044424,intracellular part;GO:0043226,organelle;GO:0070062,extracellular vesicular exosom…	GO:0048037,cofactor binding;GO:0003824,catalytic activity;GO:0042802,identical protein binding;GO:0050662,coenzyme binding;GO:0016616,oxidoreductase activity, acting on the CH-OH group of donors, NAD or NADP as acceptor;GO:0019899,enzyme binding;GO:0016614,oxidoreductase activity, acting on CH-OH group of donors;GO:0005515,protein binding;GO:0005488,binding;GO:0051287,NAD or NADH binding;GO:00164…	ko01100,Metabolic pathways;ko00620,Pyruvate metabolism;ko00270,Cysteine and methionine metabolism;ko01120,Microbial metabolism in diverse environments;ko00010,Glycolysis / Gluconeogenesis;ko00640,Propanoate metabolism
565	sp|P35232|PHB_HUMAN	Prohibitin OS=Homo sapiens OX=9606 GN=PHB PE=1 SV=1		up	1	1.33948	0.0226468	growth;regulation of biological process;cellular component organization or biogenesis;response to stimulus;immune system process;biological regulation;positive regulation of biological process;metabolic process;developmental process;death;cell proliferation;signaling;negative regulation of biological process;multicellular organismal process;cellular process	extracellular region part;organelle part;cell part;membrane-enclosed lumen;organelle;extracellular region;cell	nucleic acid binding transcription factor activity;binding	Posttranslational modification, protein turnover, chaperones ;		GO:0070373,negative regulation of ERK1 and ERK2 cascade;GO:0050727,regulation of inflammatory response;GO:0045449,regulation of transcription;GO:0010558,negative regulation of macromolecule biosynthetic process;GO:0044238,primary metabolic process;GO:0060348,bone development;GO:0051253,negative regulation of RNA metabolic process;GO:0065008,regulation of biological quality;GO:0048518,positive reg…	GO:0005739,mitochondrion;GO:0005768,endosome;GO:0044422,organelle part;GO:0044429,mitochondrial part;GO:0031981,nuclear lumen;GO:0005622,intracellular;GO:0031974,membrane-enclosed lumen;GO:0044421,extracellular region part;GO:0016020,membrane;GO:0031967,organelle envelope;GO:0005740,mitochondrial envelope;GO:0019866,organelle inner membrane;GO:0031988,membrane-bounded vesicle;GO:0043227,membrane-…	GO:0001846,opsonin binding;GO:0042826,histone deacetylase binding;GO:0031871,proteinase activated receptor binding;GO:0008022,protein C-terminus binding;GO:0001664,G-protein-coupled receptor binding;GO:0019899,enzyme binding;GO:0005515,protein binding;GO:0005488,binding;GO:0005102,receptor binding;GO:0001848,complement binding
568	sp|P14923|PLAK_HUMAN	Junction plakoglobin OS=Homo sapiens OX=9606 GN=JUP PE=1 SV=3		down	1	0.625009	0.00135949	signaling;locomotion;multicellular organismal process;localization;cell proliferation;cellular process;response to stimulus;biological regulation;regulation of biological process;cellular component organization or biogenesis;establishment of localization;positive regulation of biological process;developmental process;metabolic process;biological adhesion	organelle;cell part;organelle part;extracellular region part;extracellular region;cell;macromolecular complex	protein binding transcription factor activity;structural molecule activity;molecular transducer activity;binding		Pathways in cancer;Acute myeloid leukemia;Arrhythmogenic right ventricular cardiomyopathy (ARVC)	GO:0033036,macromolecule localization;GO:0051101,regulation of DNA binding;GO:0044085,cellular component biogenesis;GO:0008104,protein localization;GO:0009628,response to abiotic stimulus;GO:0007398,ectoderm development;GO:0045449,regulation of transcription;GO:0043388,positive regulation of DNA binding;GO:0051291,protein heterooligomerization;GO:0010556,regulation of macromolecule biosynthetic p…	GO:0005915,zonula adherens;GO:0005911,cell-cell junction;GO:0044444,cytoplasmic part;GO:0045178,basal part of cell;GO:0030054,cell junction;GO:0019898,extrinsic to membrane;GO:0031982,vesicle;GO:0005623,cell;GO:0043230,extracellular organelle;GO:0005886,plasma membrane;GO:0030018,Z disc;GO:0016328,lateral plasma membrane;GO:0016323,basolateral plasma membrane;GO:0015629,actin cytoskeleton;GO:0043…	GO:0060089,molecular transducer activity;GO:0003713,transcription coactivator activity;GO:0005198,structural molecule activity;GO:0019901,protein kinase binding;GO:0004871,signal transducer activity;GO:0030528,transcription regulator activity;GO:0005515,protein binding;GO:0005488,binding;GO:0050839,cell adhesion molecule binding;GO:0019902,phosphatase binding;GO:0016563,transcription activator ac…	ko05412,Arrhythmogenic right ventricular cardiomyopathy (ARVC);ko05200,Pathways in cancer;ko05221,Acute myeloid leukemia
569	sp|P61221|ABCE1_HUMAN	ATP-binding cassette sub-family E member 1 OS=Homo sapiens OX=9606 GN=ABCE1 PE=1 SV=1		up	1	1.51142	0.0387786	response to stimulus;viral reproduction;biological regulation;regulation of biological process;establishment of localization;metabolic process;multi-organism process;localization;cellular process	cell;cell part;organelle part;membrane-enclosed lumen;organelle	enzyme regulator activity;catalytic activity;binding	Carbohydrate transport and metabolism ;General function prediction only ;		GO:0006401,RNA catabolic process;GO:0044237,cellular metabolic process;GO:0009056,catabolic process;GO:0051707,response to other organism;GO:0055085,transmembrane transport;GO:0043285,biopolymer catabolic process;GO:0043283,biopolymer metabolic process;GO:0016032,viral reproduction;GO:0009057,macromolecule catabolic process;GO:0051704,multi-organism process;GO:0050896,response to stimulus;GO:0006…	GO:0043226,organelle;GO:0044424,intracellular part;GO:0005737,cytoplasm;GO:0043229,intracellular organelle;GO:0044446,intracellular organelle part;GO:0070013,intracellular organelle lumen;GO:0044464,cell part;GO:0043227,membrane-bounded organelle;GO:0043231,intracellular membrane-bounded organelle;GO:0044429,mitochondrial part;GO:0044422,organelle part;GO:0031974,membrane-enclosed lumen;GO:003198…	GO:0016787,hydrolase activity;GO:0003824,catalytic activity;GO:0016817,hydrolase activity, acting on acid anhydrides;GO:0030234,enzyme regulator activity;GO:0032555,purine ribonucleotide binding;GO:0001882,nucleoside binding;GO:0005515,protein binding;GO:0005488,binding;GO:0030554,adenyl nucleotide binding;GO:0016818,hydrolase activity, acting on acid anhydrides, in phosphorus-containing anhydrid…
571	sp|P23588|IF4B_HUMAN	Eukaryotic translation initiation factor 4B OS=Homo sapiens OX=9606 GN=EIF4B PE=1 SV=2		up	1	1.29574	0.0300124	regulation of biological process;response to stimulus;signaling;biological regulation;cellular process;metabolic process	cell part;macromolecular complex;cell	binding	General function prediction only ;	RNA transport;mTOR signaling pathway	GO:0044248,cellular catabolic process;GO:0044260,cellular macromolecule metabolic process;GO:0006139,nucleobase, nucleoside, nucleotide and nucleic acid metabolic process;GO:0044265,cellular macromolecule catabolic process;GO:0050896,response to stimulus;GO:0000289,nuclear-transcribed mRNA poly(A) tail shortening;GO:0007154,cell communication;GO:0010468,regulation of gene expression;GO:0000288,nu…	GO:0005829,cytosol;GO:0032991,macromolecular complex;GO:0005623,cell;GO:0044464,cell part;GO:0044444,cytoplasmic part;GO:0005622,intracellular;GO:0005737,cytoplasm;GO:0043234,protein complex;GO:0016281,eukaryotic translation initiation factor 4F complex;GO:0044424,intracellular part	GO:0008135,translation factor activity, nucleic acid binding;GO:0045182,translation regulator activity;GO:0003676,nucleic acid binding;GO:0003743,translation initiation factor activity;GO:0005515,protein binding;GO:0005488,binding	ko03013,RNA transport;ko04150,mTOR signaling pathway
583	sp|P13804|ETFA_HUMAN	Electron transfer flavoprotein subunit alpha, mitochondrial OS=Homo sapiens OX=9606 GN=ETFA PE=1 SV=1		down	1	0.719892	2.20441e-05	biological regulation;cellular process;metabolic process	extracellular region;cell;organelle part;extracellular region part;cell part;membrane-enclosed lumen;organelle	catalytic activity;electron carrier activity;binding	Energy production and conversion ;		GO:0009056,catabolic process;GO:0006629,lipid metabolic process;GO:0046395,carboxylic acid catabolic process;GO:0022904,respiratory electron transport chain;GO:0032787,monocarboxylic acid metabolic process;GO:0044237,cellular metabolic process;GO:0016042,lipid catabolic process;GO:0043436,oxoacid metabolic process;GO:0030258,lipid modification;GO:0033539,fatty acid beta-oxidation using acyl-CoA d…	GO:0005759,mitochondrial matrix;GO:0005739,mitochondrion;GO:0043230,extracellular organelle;GO:0005623,cell;GO:0043233,organelle lumen;GO:0044429,mitochondrial part;GO:0044422,organelle part;GO:0031982,vesicle;GO:0044421,extracellular region part;GO:0031980,mitochondrial lumen;GO:0031974,membrane-enclosed lumen;GO:0044444,cytoplasmic part;GO:0005622,intracellular;GO:0043227,membrane-bounded organ…	GO:0005488,binding;GO:0030554,adenyl nucleotide binding;GO:0016491,oxidoreductase activity;GO:0001882,nucleoside binding;GO:0050662,coenzyme binding;GO:0016627,oxidoreductase activity, acting on the CH-CH group of donors;GO:0048037,cofactor binding;GO:0009055,electron carrier activity;GO:0003824,catalytic activity;GO:0050660,FAD binding;GO:0001883,purine nucleoside binding;GO:0003995,acyl-CoA deh…
587	sp|Q32P28|P3H1_HUMAN	Prolyl 3-hydroxylase 1 OS=Homo sapiens OX=9606 GN=P3H1 PE=1 SV=2		down	1	0.800167	0.00353919	developmental process;metabolic process;establishment of localization;regulation of biological process;cellular component organization or biogenesis;growth;biological regulation;cellular process;cell proliferation;localization;multicellular organismal process;negative regulation of biological process	cell part;extracellular region part;organelle;extracellular region;cell;macromolecular complex;organelle part;membrane-enclosed lumen	catalytic activity;binding			GO:0051046,regulation of secretion;GO:0070201,regulation of establishment of protein localization;GO:0051239,regulation of multicellular organismal process;GO:0043412,biopolymer modification;GO:0050793,regulation of developmental process;GO:0034103,regulation of tissue remodeling;GO:0060348,bone development;GO:0034960,cellular biopolymer metabolic process;GO:0044238,primary metabolic process;GO:0…	GO:0044444,cytoplasmic part;GO:0031982,vesicle;GO:0031012,extracellular matrix;GO:0005623,cell;GO:0043233,organelle lumen;GO:0043230,extracellular organelle;GO:0005576,extracellular region;GO:0043229,intracellular organelle;GO:0005578,proteinaceous extracellular matrix;GO:0070062,extracellular vesicular exosome;GO:0005634,nucleus;GO:0005788,endoplasmic reticulum lumen;GO:0043231,intracellular mem…	GO:0016491,oxidoreductase activity;GO:0019842,vitamin binding;GO:0046872,metal ion binding;GO:0005515,protein binding;GO:0005488,binding;GO:0043167,ion binding;GO:0031543,peptidyl-proline dioxygenase activity;GO:0003824,catalytic activity;GO:0005506,iron ion binding;GO:0016706,oxidoreductase activity, acting on paired donors, with incorporation or reduction of molecular oxygen, 2-oxoglutarate as …
592	sp|O95757|HS74L_HUMAN	Heat shock 70 kDa protein 4L OS=Homo sapiens OX=9606 GN=HSPA4L PE=1 SV=3		up	1	1.22576	0.0420427	metabolic process;cellular process;response to stimulus	cell part;organelle;cell	binding	Posttranslational modification, protein turnover, chaperones ;	Protein processing in endoplasmic reticulum	GO:0051789,response to protein stimulus;GO:0044238,primary metabolic process;GO:0006950,response to stress;GO:0034960,cellular biopolymer metabolic process;GO:0050896,response to stimulus;GO:0044260,cellular macromolecule metabolic process;GO:0006457,protein folding;GO:0006986,response to unfolded protein;GO:0043170,macromolecule metabolic process;GO:0009987,cellular process;GO:0019538,protein me…	GO:0043227,membrane-bounded organelle;GO:0043231,intracellular membrane-bounded organelle;GO:0005829,cytosol;GO:0005623,cell;GO:0043229,intracellular organelle;GO:0005737,cytoplasm;GO:0043226,organelle;GO:0044424,intracellular part;GO:0005634,nucleus;GO:0044464,cell part;GO:0005622,intracellular;GO:0044444,cytoplasmic part	GO:0032555,purine ribonucleotide binding;GO:0032553,ribonucleotide binding;GO:0005524,ATP binding;GO:0017076,purine nucleotide binding;GO:0005488,binding;GO:0000166,nucleotide binding;GO:0030554,adenyl nucleotide binding;GO:0001883,purine nucleoside binding;GO:0001882,nucleoside binding;GO:0032559,adenyl ribonucleotide binding	ko04141,Protein processing in endoplasmic reticulum
593	sp|P23381|SYWC_HUMAN	Tryptophan--tRNA ligase, cytoplasmic OS=Homo sapiens OX=9606 GN=WARS1 PE=1 SV=2		down	1	0.778349	0.0432702	cellular process;negative regulation of biological process;multicellular organismal process;cell proliferation;developmental process;metabolic process;biological regulation;regulation of biological process	extracellular region part;cell part;organelle;cell;extracellular region	binding;catalytic activity	Translation, ribosomal structure and biogenesis ;	Aminoacyl-tRNA biosynthesis;Tryptophan metabolism	GO:0051239,regulation of multicellular organismal process;GO:0050793,regulation of developmental process;GO:0034961,cellular biopolymer biosynthetic process;GO:0006807,nitrogen compound metabolic process;GO:0006082,organic acid metabolic process;GO:0034960,cellular biopolymer metabolic process;GO:0044238,primary metabolic process;GO:0008152,metabolic process;GO:0050789,regulation of biological pr…	GO:0005829,cytosol;GO:0031988,membrane-bounded vesicle;GO:0065010,extracellular membrane-bounded organelle;GO:0043227,membrane-bounded organelle;GO:0043231,intracellular membrane-bounded organelle;GO:0005576,extracellular region;GO:0044464,cell part;GO:0070062,extracellular vesicular exosome;GO:0044424,intracellular part;GO:0043226,organelle;GO:0005634,nucleus;GO:0005737,cytoplasm;GO:0043229,intr…	GO:0001882,nucleoside binding;GO:0030554,adenyl nucleotide binding;GO:0004812,aminoacyl-tRNA ligase activity;GO:0016875,ligase activity, forming carbon-oxygen bonds;GO:0005488,binding;GO:0005515,protein binding;GO:0003824,catalytic activity;GO:0032555,purine ribonucleotide binding;GO:0032559,adenyl ribonucleotide binding;GO:0001883,purine nucleoside binding;GO:0000166,nucleotide binding;GO:001687…	ko00380,Tryptophan metabolism;ko00970,Aminoacyl-tRNA biosynthesis
594	sp|P37802|TAGL2_HUMAN	Transgelin-2 OS=Homo sapiens OX=9606 GN=TAGLN2 PE=1 SV=3		down	1	0.669028	0.0435684	cellular process;developmental process	extracellular region part;organelle;extracellular region	binding	Cytoskeleton ;		GO:0009887,organ morphogenesis;GO:0048513,organ development;GO:0009888,tissue development;GO:0032502,developmental process;GO:0030855,epithelial cell differentiation;GO:0007275,multicellular organismal development;GO:0009653,anatomical structure morphogenesis;GO:0048869,cellular developmental process;GO:0002009,morphogenesis of an epithelium;GO:0048856,anatomical structure development;GO:0009987,…	GO:0031988,membrane-bounded vesicle;GO:0065010,extracellular membrane-bounded organelle;GO:0043227,membrane-bounded organelle;GO:0043230,extracellular organelle;GO:0031982,vesicle;GO:0043226,organelle;GO:0070062,extracellular vesicular exosome;GO:0044421,extracellular region part;GO:0005576,extracellular region	GO:0005515,protein binding;GO:0005488,binding
602	sp|P23229|ITA6_HUMAN	Integrin alpha-6 OS=Homo sapiens OX=9606 GN=ITGA6 PE=1 SV=5		down	1	0.781802	0.0128331	developmental process;metabolic process;death;positive regulation of biological process;biological adhesion;immune system process;biological regulation;response to stimulus;cellular component organization or biogenesis;regulation of biological process;cellular process;multicellular organismal process;locomotion;signaling;localization	macromolecular complex;extracellular region;cell;cell part;extracellular region part	binding		Focal adhesion;Pathways in cancer;Hypertrophic cardiomyopathy (HCM);Hematopoietic cell lineage;Small cell lung cancer;Arrhythmogenic right ventricular cardiomyopathy (ARVC);Toxoplasmosis;Cell adhesion molecules (CAMs);Dilated cardiomyopathy;Regulation of actin cytoskeleton;ECM-receptor interaction	GO:0045937,positive regulation of phosphate metabolic process;GO:0050793,regulation of developmental process;GO:0080090,regulation of primary metabolic process;GO:0051179,localization;GO:0048870,cell motility;GO:0009611,response to wounding;GO:0010562,positive regulation of phosphorus metabolic process;GO:0030030,cell projection organization;GO:0060255,regulation of macromolecule metabolic proces…	GO:0043234,protein complex;GO:0044421,extracellular region part;GO:0016020,membrane;GO:0044425,membrane part;GO:0005925,focal adhesion;GO:0044464,cell part;GO:0008305,integrin complex;GO:0005924,cell-substrate adherens junction;GO:0005604,basement membrane;GO:0070161,anchoring junction;GO:0044420,extracellular matrix part;GO:0032991,macromolecular complex;GO:0005887,integral to plasma membrane;GO…	GO:0043169,cation binding;GO:0005102,receptor binding;GO:0046872,metal ion binding;GO:0005515,protein binding;GO:0005488,binding;GO:0043167,ion binding;GO:0005178,integrin binding;GO:0032403,protein complex binding	ko05200,Pathways in cancer;ko05145,Toxoplasmosis;ko04512,ECM-receptor interaction;ko04640,Hematopoietic cell lineage;ko04514,Cell adhesion molecules (CAMs);ko05414,Dilated cardiomyopathy;ko05410,Hypertrophic cardiomyopathy (HCM);ko04810,Regulation of actin cytoskeleton;ko04510,Focal adhesion;ko05222,Small cell lung cancer;ko05412,Arrhythmogenic right ventricular cardiomyopathy (ARVC)
603	sp|P16401|H15_HUMAN	Histone H1.5 OS=Homo sapiens OX=9606 GN=H1-5 PE=1 SV=3		up	1	1.33518	0.00472382	negative regulation of biological process;localization;cellular process;biological regulation;regulation of biological process;cellular component organization or biogenesis;growth;metabolic process;positive regulation of biological process;establishment of localization	cell part;extracellular region part;organelle;macromolecular complex;extracellular region;cell;organelle part;membrane-enclosed lumen	binding			GO:0006325,chromatin organization;GO:0006996,organelle organization;GO:0032268,regulation of cellular protein metabolic process;GO:0030307,positive regulation of cell growth;GO:0080090,regulation of primary metabolic process;GO:0034622,cellular macromolecular complex assembly;GO:0034728,nucleosome organization;GO:0060255,regulation of macromolecule metabolic process;GO:0010629,negative regulation…	GO:0043232,intracellular non-membrane-bounded organelle;GO:0005576,extracellular region;GO:0043228,non-membrane-bounded organelle;GO:0005634,nucleus;GO:0070062,extracellular vesicular exosome;GO:0043229,intracellular organelle;GO:0000786,nucleosome;GO:0000228,nuclear chromosome;GO:0065010,extracellular membrane-bounded organelle;GO:0032993,protein-DNA complex;GO:0043231,intracellular membrane-bou…	GO:0042826,histone deacetylase binding;GO:0003677,DNA binding;GO:0043566,structure-specific DNA binding;GO:0005515,protein binding;GO:0019899,enzyme binding;GO:0005488,binding;GO:0003682,chromatin binding;GO:0003676,nucleic acid binding;GO:0031490,chromatin DNA binding
606	sp|P55039|DRG2_HUMAN	Developmentally-regulated GTP-binding protein 2 OS=Homo sapiens OX=9606 GN=DRG2 PE=1 SV=1		up	1	1.26604	0.0497287	cellular process;regulation of biological process;signaling;response to stimulus;biological regulation	cell;cell part;organelle part;membrane-enclosed lumen;organelle	binding	General function prediction only ;		GO:0007154,cell communication;GO:0007165,signal transduction;GO:0065007,biological regulation;GO:0009987,cellular process;GO:0050789,regulation of biological process;GO:0050794,regulation of cellular process	GO:0043226,organelle;GO:0044424,intracellular part;GO:0005634,nucleus;GO:0043229,intracellular organelle;GO:0005737,cytoplasm;GO:0070013,intracellular organelle lumen;GO:0044446,intracellular organelle part;GO:0044464,cell part;GO:0043231,intracellular membrane-bounded organelle;GO:0043227,membrane-bounded organelle;GO:0005654,nucleoplasm;GO:0044422,organelle part;GO:0031981,nuclear lumen;GO:0005…	GO:0032555,purine ribonucleotide binding;GO:0032553,ribonucleotide binding;GO:0017076,purine nucleotide binding;GO:0019001,guanyl nucleotide binding;GO:0032561,guanyl ribonucleotide binding;GO:0000166,nucleotide binding;GO:0005488,binding;GO:0005515,protein binding;GO:0005525,GTP binding
612	sp|O60832|DKC1_HUMAN	H/ACA ribonucleoprotein complex subunit DKC1 OS=Homo sapiens OX=9606 GN=DKC1 PE=1 SV=3		up	1	1.33232	0.00753997	positive regulation of biological process;metabolic process;cellular process;biological regulation;regulation of biological process;cellular component organization or biogenesis;cell proliferation	macromolecular complex;cell;organelle;membrane-enclosed lumen;organelle part;cell part	binding;catalytic activity	Translation, ribosomal structure and biogenesis ;	RNA transport	GO:0031328,positive regulation of cellular biosynthetic process;GO:0032206,positive regulation of telomere maintenance;GO:0043283,biopolymer metabolic process;GO:0032212,positive regulation of telomere maintenance via telomerase;GO:0031126,snoRNA 3'-end processing;GO:0019222,regulation of metabolic process;GO:0051171,regulation of nitrogen compound metabolic process;GO:0044237,cellular metabolic …	GO:0043233,organelle lumen;GO:0005623,cell;GO:0031981,nuclear lumen;GO:0030529,ribonucleoprotein complex;GO:0044422,organelle part;GO:0031974,membrane-enclosed lumen;GO:0044428,nuclear part;GO:0005622,intracellular;GO:0043227,membrane-bounded organelle;GO:0043231,intracellular membrane-bounded organelle;GO:0005732,small nucleolar ribonucleoprotein complex;GO:0005730,nucleolus;GO:0044452,nucleolar…	GO:0003676,nucleic acid binding;GO:0003723,RNA binding;GO:0034061,DNA polymerase activity;GO:0005515,protein binding;GO:0005488,binding;GO:0016740,transferase activity;GO:0003824,catalytic activity;GO:0016853,isomerase activity;GO:0030515,snoRNA binding;GO:0016866,intramolecular transferase activity;GO:0016779,nucleotidyltransferase activity;GO:0016772,transferase activity, transferring phosphoru…	ko03013,RNA transport
622	sp|Q96KP4|CNDP2_HUMAN	Cytosolic non-specific dipeptidase OS=Homo sapiens OX=9606 GN=CNDP2 PE=1 SV=2		down	1	0.770372	0.00533886	response to stimulus;cellular process;metabolic process	extracellular region;cell;membrane-enclosed lumen;organelle;organelle part;cell part;extracellular region part	binding;catalytic activity	Amino acid transport and metabolism ;		GO:0050896,response to stimulus;GO:0044262,cellular carbohydrate metabolic process;GO:0006805,xenobiotic metabolic process;GO:0019752,carboxylic acid metabolic process;GO:0051186,cofactor metabolic process;GO:0006732,coenzyme metabolic process;GO:0006518,peptide metabolic process;GO:0006790,sulfur metabolic process;GO:0005975,carbohydrate metabolic process;GO:0043436,oxoacid metabolic process;GO:…	GO:0044464,cell part;GO:0005576,extracellular region;GO:0070013,intracellular organelle lumen;GO:0044446,intracellular organelle part;GO:0005737,cytoplasm;GO:0043229,intracellular organelle;GO:0070062,extracellular vesicular exosome;GO:0044424,intracellular part;GO:0043226,organelle;GO:0005634,nucleus;GO:0005829,cytosol;GO:0005654,nucleoplasm;GO:0043231,intracellular membrane-bounded organelle;GO…	GO:0016787,hydrolase activity;GO:0003824,catalytic activity;GO:0008237,metallopeptidase activity;GO:0008238,exopeptidase activity;GO:0043167,ion binding;GO:0070011,peptidase activity, acting on L-amino acid peptides;GO:0005488,binding;GO:0046872,metal ion binding;GO:0008233,peptidase activity;GO:0043169,cation binding
624	sp|Q02878|RL6_HUMAN	60S ribosomal protein L6 OS=Homo sapiens OX=9606 GN=RPL6 PE=1 SV=3		up	1	1.74564	0.000605758	cellular process;localization;reproductive process;establishment of localization;metabolic process;cellular component organization or biogenesis;regulation of biological process;reproduction;viral reproduction;biological regulation	cell;macromolecular complex;organelle part;cell part;organelle	binding;structural molecule activity	Translation, ribosomal structure and biogenesis ;	Ribosome	GO:0006807,nitrogen compound metabolic process;GO:0034961,cellular biopolymer biosynthetic process;GO:0051649,establishment of localization in cell;GO:0043241,protein complex disassembly;GO:0008104,protein localization;GO:0044085,cellular component biogenesis;GO:0006402,mRNA catabolic process;GO:0033036,macromolecule localization;GO:0010556,regulation of macromolecule biosynthetic process;GO:0044…	GO:0044446,intracellular organelle part;GO:0044464,cell part;GO:0044425,membrane part;GO:0005925,focal adhesion;GO:0043226,organelle;GO:0033279,ribosomal subunit;GO:0044424,intracellular part;GO:0015934,large ribosomal subunit;GO:0005737,cytoplasm;GO:0032991,macromolecular complex;GO:0070161,anchoring junction;GO:0005829,cytosol;GO:0005924,cell-substrate adherens junction;GO:0043227,membrane-boun…	GO:0003735,structural constituent of ribosome;GO:0003676,nucleic acid binding;GO:0005198,structural molecule activity;GO:0003677,DNA binding;GO:0005488,binding	ko03010,Ribosome
629	sp|O76021|RL1D1_HUMAN	Ribosomal L1 domain-containing protein 1 OS=Homo sapiens OX=9606 GN=RSL1D1 PE=1 SV=3		up	1	1.2005	0.025952	death;developmental process;cellular process;biological regulation;multicellular organismal process;regulation of biological process;localization	cell part;organelle part;membrane-enclosed lumen;organelle;cell			Cell cycle	GO:0050793,regulation of developmental process;GO:0010941,regulation of cell death;GO:0001503,ossification;GO:0032880,regulation of protein localization;GO:0032502,developmental process;GO:0060348,bone development;GO:0043067,regulation of programmed cell death;GO:0050789,regulation of biological process;GO:0048869,cellular developmental process;GO:0007275,multicellular organismal development;GO:0…	GO:0044464,cell part;GO:0043232,intracellular non-membrane-bounded organelle;GO:0044446,intracellular organelle part;GO:0070013,intracellular organelle lumen;GO:0043229,intracellular organelle;GO:0044424,intracellular part;GO:0005634,nucleus;GO:0043226,organelle;GO:0043228,non-membrane-bounded organelle;GO:0005730,nucleolus;GO:0043227,membrane-bounded organelle;GO:0043231,intracellular membrane-b…		ko04110,Cell cycle
635	sp|O75400|PR40A_HUMAN	Pre-mRNA-processing factor 40 homolog A OS=Homo sapiens OX=9606 GN=PRPF40A PE=1 SV=2		up	1	1.2199	0.0331584	locomotion;localization;cellular process;biological regulation;regulation of biological process;cellular component organization or biogenesis;developmental process;metabolic process	macromolecular complex;cell;organelle part;cell part;organelle;membrane-enclosed lumen	binding	RNA processing and modification ;	Spliceosome	GO:0016071,mRNA metabolic process;GO:0000398,nuclear mRNA splicing, via spliceosome;GO:0044237,cellular metabolic process;GO:0032465,regulation of cytokinesis;GO:0051128,regulation of cellular component organization;GO:0016043,cellular component organization;GO:0043283,biopolymer metabolic process;GO:0007010,cytoskeleton organization;GO:0006139,nucleobase, nucleoside, nucleotide and nucleic acid …	GO:0043227,membrane-bounded organelle;GO:0043231,intracellular membrane-bounded organelle;GO:0030532,small nuclear ribonucleoprotein complex;GO:0071010,prespliceosome;GO:0016363,nuclear matrix;GO:0005654,nucleoplasm;GO:0032991,macromolecular complex;GO:0005737,cytoplasm;GO:0043229,intracellular organelle;GO:0044424,intracellular part;GO:0043226,organelle;GO:0005634,nucleus;GO:0005685,U1 snRNP;GO:…	GO:0005515,protein binding;GO:0005488,binding	ko03040,Spliceosome
639	sp|P62495|ERF1_HUMAN	Eukaryotic peptide chain release factor subunit 1 OS=Homo sapiens OX=9606 GN=ETF1 PE=1 SV=3		up	1	2.11983	0.00896186	cellular process;metabolic process;regulation of biological process;cellular component organization or biogenesis;biological regulation	cell part;organelle;cell	binding	Translation, ribosomal structure and biogenesis ;		GO:0009056,catabolic process;GO:0051128,regulation of cellular component organization;GO:0051246,regulation of protein metabolic process;GO:0043285,biopolymer catabolic process;GO:0043283,biopolymer metabolic process;GO:0006479,protein amino acid methylation;GO:0009057,macromolecule catabolic process;GO:0010608,posttranscriptional regulation of gene expression;GO:0016071,mRNA metabolic process;GO…	GO:0043227,membrane-bounded organelle;GO:0043231,intracellular membrane-bounded organelle;GO:0005829,cytosol;GO:0005623,cell;GO:0005737,cytoplasm;GO:0043229,intracellular organelle;GO:0044424,intracellular part;GO:0005634,nucleus;GO:0043226,organelle;GO:0044464,cell part;GO:0044444,cytoplasmic part;GO:0005622,intracellular	GO:0005488,binding;GO:0005515,protein binding;GO:0043021,ribonucleoprotein binding;GO:0008135,translation factor activity, nucleic acid binding;GO:0043022,ribosome binding;GO:0003676,nucleic acid binding;GO:0045182,translation regulator activity
646	sp|Q9HAV4|XPO5_HUMAN	Exportin-5 OS=Homo sapiens OX=9606 GN=XPO5 PE=1 SV=1		up	1	1.2087	0.0461108	metabolic process;establishment of localization;cellular process;biological regulation;negative regulation of biological process;regulation of biological process;localization	cell part;organelle part;organelle;membrane-enclosed lumen;macromolecular complex;cell	transporter activity;binding	Nuclear structure ; Intracellular trafficking, secretion, and vesicular transport ;	RNA transport	GO:0051168,nuclear export;GO:0015031,protein transport;GO:0048519,negative regulation of biological process;GO:0006405,RNA export from nucleus;GO:0016458,gene silencing;GO:0010608,posttranscriptional regulation of gene expression;GO:0070727,cellular macromolecule localization;GO:0034613,cellular protein localization;GO:0019222,regulation of metabolic process;GO:0035195,gene silencing by miRNA;GO:…	GO:0043229,intracellular organelle;GO:0005737,cytoplasm;GO:0043226,organelle;GO:0005634,nucleus;GO:0044424,intracellular part;GO:0044464,cell part;GO:0070013,intracellular organelle lumen;GO:0044446,intracellular organelle part;GO:0043227,membrane-bounded organelle;GO:0043231,intracellular membrane-bounded organelle;GO:0005654,nucleoplasm;GO:0005829,cytosol;GO:0032991,macromolecular complex;GO:00…	GO:0008536,Ran GTPase binding;GO:0000049,tRNA binding;GO:0008565,protein transporter activity;GO:0005488,binding;GO:0003729,mRNA binding;GO:0019899,enzyme binding;GO:0005515,protein binding;GO:0051020,GTPase binding;GO:0005215,transporter activity;GO:0003723,RNA binding;GO:0003676,nucleic acid binding;GO:0031267,small GTPase binding;GO:0017016,Ras GTPase binding;GO:0022892,substrate-specific tran…	ko03013,RNA transport
658	sp|P23919|KTHY_HUMAN	Thymidylate kinase OS=Homo sapiens OX=9606 GN=DTYMK PE=1 SV=4		down	1	0.805993	0.0113195	cellular process;developmental process;metabolic process;cell proliferation;response to stimulus	membrane-enclosed lumen;organelle;organelle part;cell part;cell	catalytic activity;binding	Nucleotide transport and metabolism ;	Metabolic pathways;Pyrimidine metabolism	GO:0006796,phosphate metabolic process;GO:0048468,cell development;GO:0060537,muscle tissue development;GO:0006014,D-ribose metabolic process;GO:0007519,skeletal muscle tissue development;GO:0044238,primary metabolic process;GO:0007517,muscle organ development;GO:0014706,striated muscle tissue development;GO:0009725,response to hormone stimulus;GO:0006807,nitrogen compound metabolic process;GO:00…	GO:0043227,membrane-bounded organelle;GO:0043231,intracellular membrane-bounded organelle;GO:0031970,organelle envelope lumen;GO:0031967,organelle envelope;GO:0005740,mitochondrial envelope;GO:0005829,cytosol;GO:0005737,cytoplasm;GO:0043229,intracellular organelle;GO:0044424,intracellular part;GO:0043226,organelle;GO:0044464,cell part;GO:0031975,envelope;GO:0070013,intracellular organelle lumen;G…	GO:0001882,nucleoside binding;GO:0032559,adenyl ribonucleotide binding;GO:0005488,binding;GO:0001883,purine nucleoside binding;GO:0030554,adenyl nucleotide binding;GO:0000166,nucleotide binding;GO:0016740,transferase activity;GO:0003824,catalytic activity;GO:0017076,purine nucleotide binding;GO:0032553,ribonucleotide binding;GO:0032555,purine ribonucleotide binding;GO:0005524,ATP binding;GO:00163…	ko00240,Pyrimidine metabolism;ko01100,Metabolic pathways
659	sp|Q8NI27|THOC2_HUMAN	THO complex subunit 2 OS=Homo sapiens OX=9606 GN=THOC2 PE=1 SV=2		up	1	1.28552	0.0177675	metabolic process;developmental process;establishment of localization;reproduction;viral reproduction;cellular process;localization;multicellular organismal process;reproductive process;multi-organism process	cell part;organelle part;membrane-enclosed lumen;organelle;cell;macromolecular complex	binding		RNA transport;Spliceosome	GO:0051641,cellular localization;GO:0006913,nucleocytoplasmic transport;GO:0043170,macromolecule metabolic process;GO:0009987,cellular process;GO:0051236,establishment of RNA localization;GO:0022414,reproductive process;GO:0032501,multicellular organismal process;GO:0048731,system development;GO:0016070,RNA metabolic process;GO:0007275,multicellular organismal development;GO:0048699,generation of…	GO:0000228,nuclear chromosome;GO:0044427,chromosomal part;GO:0043227,membrane-bounded organelle;GO:0043231,intracellular membrane-bounded organelle;GO:0032991,macromolecular complex;GO:0005654,nucleoplasm;GO:0044424,intracellular part;GO:0043228,non-membrane-bounded organelle;GO:0043226,organelle;GO:0005634,nucleus;GO:0016607,nuclear speck;GO:0043229,intracellular organelle;GO:0044446,intracellul…	GO:0003676,nucleic acid binding;GO:0003723,RNA binding;GO:0005515,protein binding;GO:0005488,binding	ko03013,RNA transport;ko03040,Spliceosome
662	sp|Q14527|HLTF_HUMAN	Helicase-like transcription factor OS=Homo sapiens OX=9606 GN=HLTF PE=1 SV=2		down	1	0.803325	0.00972027	positive regulation of biological process;metabolic process;cellular process;response to stimulus;biological regulation;cellular component organization or biogenesis;regulation of biological process	cell;organelle;membrane-enclosed lumen;organelle part;cell part	nucleic acid binding transcription factor activity;catalytic activity;binding	Transcription ; Replication, recombination and repair ;	Homologous recombination	GO:0050896,response to stimulus;GO:0048522,positive regulation of cellular process;GO:0006357,regulation of transcription from RNA polymerase II promoter;GO:0044260,cellular macromolecule metabolic process;GO:0045941,positive regulation of transcription;GO:0006259,DNA metabolic process;GO:0010628,positive regulation of gene expression;GO:0010468,regulation of gene expression;GO:0031325,positive r…	GO:0044446,intracellular organelle part;GO:0070013,intracellular organelle lumen;GO:0043232,intracellular non-membrane-bounded organelle;GO:0044464,cell part;GO:0043228,non-membrane-bounded organelle;GO:0044424,intracellular part;GO:0005634,nucleus;GO:0043226,organelle;GO:0043229,intracellular organelle;GO:0005737,cytoplasm;GO:0005654,nucleoplasm;GO:0005730,nucleolus;GO:0043227,membrane-bounded o…	GO:0032559,adenyl ribonucleotide binding;GO:0046914,transition metal ion binding;GO:0001883,purine nucleoside binding;GO:0043169,cation binding;GO:0000166,nucleotide binding;GO:0016462,pyrophosphatase activity;GO:0017076,purine nucleotide binding;GO:0016818,hydrolase activity, acting on acid anhydrides, in phosphorus-containing anhydrides;GO:0016887,ATPase activity;GO:0008270,zinc ion binding;GO:…	ko03440,Homologous recombination
663	sp|Q03701|CEBPZ_HUMAN	CCAAT/enhancer-binding protein zeta OS=Homo sapiens OX=9606 GN=CEBPZ PE=1 SV=3		up	1	1.33406	0.047595	biological regulation;regulation of biological process;positive regulation of biological process;metabolic process;cellular process	organelle;cell part;cell	nucleic acid binding transcription factor activity;binding	Translation, ribosomal structure and biogenesis ;		GO:0045944,positive regulation of transcription from RNA polymerase II promoter;GO:0010556,regulation of macromolecule biosynthetic process;GO:0051252,regulation of RNA metabolic process;GO:0045449,regulation of transcription;GO:0010604,positive regulation of macromolecule metabolic process;GO:0060255,regulation of macromolecule metabolic process;GO:0080090,regulation of primary metabolic process…	GO:0005623,cell;GO:0043231,intracellular membrane-bounded organelle;GO:0043227,membrane-bounded organelle;GO:0005622,intracellular;GO:0044464,cell part;GO:0005634,nucleus;GO:0044424,intracellular part;GO:0043226,organelle;GO:0043229,intracellular organelle
681	sp|Q9NZU5|LMCD1_HUMAN	LIM and cysteine-rich domains protein 1 OS=Homo sapiens OX=9606 GN=LMCD1 PE=1 SV=1		up	1	1.27404	0.0319333	immune system process;biological regulation;response to stimulus;regulation of biological process;metabolic process;positive regulation of biological process;multicellular organismal process;negative regulation of biological process;signaling;multi-organism process;cellular process	membrane-enclosed lumen;organelle;organelle part;cell part;extracellular region part;extracellular region;cell	binding;protein binding transcription factor activity		Wnt signaling pathway	GO:0016481,negative regulation of transcription;GO:0009889,regulation of biosynthetic process;GO:0002831,regulation of response to biotic stimulus;GO:0002682,regulation of immune system process;GO:0009890,negative regulation of biosynthetic process;GO:0044237,cellular metabolic process;GO:0051171,regulation of nitrogen compound metabolic process;GO:0000122,negative regulation of transcription fro…	GO:0043233,organelle lumen;GO:0005623,cell;GO:0031012,extracellular matrix;GO:0044428,nuclear part;GO:0031974,membrane-enclosed lumen;GO:0005622,intracellular;GO:0044421,extracellular region part;GO:0044422,organelle part;GO:0031981,nuclear lumen;GO:0005654,nucleoplasm;GO:0043227,membrane-bounded organelle;GO:0043231,intracellular membrane-bounded organelle;GO:0005615,extracellular space;GO:00444…	GO:0043169,cation binding;GO:0005488,binding;GO:0005515,protein binding;GO:0046872,metal ion binding;GO:0043167,ion binding;GO:0030528,transcription regulator activity;GO:0046914,transition metal ion binding;GO:0003714,transcription corepressor activity;GO:0008134,transcription factor binding;GO:0003712,transcription cofactor activity;GO:0016564,transcription repressor activity;GO:0008270,zinc io…	ko04310,Wnt signaling pathway
687	sp|O43747|AP1G1_HUMAN	AP-1 complex subunit gamma-1 OS=Homo sapiens OX=9606 GN=AP1G1 PE=1 SV=5		up	1	1.47988	0.0189143	death;positive regulation of biological process;establishment of localization;cellular component organization or biogenesis;regulation of biological process;immune system process;biological regulation;viral reproduction;response to stimulus;pigmentation;cellular process;cell killing;localization;multi-organism process	macromolecular complex;cell;organelle;organelle part;cell part	enzyme regulator activity;binding;transporter activity		Lysosome	GO:0051251,positive regulation of lymphocyte activation;GO:0048002,antigen processing and presentation of peptide antigen;GO:0050776,regulation of immune response;GO:0032879,regulation of localization;GO:0015031,protein transport;GO:0016043,cellular component organization;GO:0019886,antigen processing and presentation of exogenous peptide antigen via MHC class II;GO:0043473,pigmentation;GO:000249…	GO:0048475,coated membrane;GO:0005773,vacuole;GO:0043234,protein complex;GO:0005802,trans-Golgi network;GO:0044422,organelle part;GO:0044431,Golgi apparatus part;GO:0005622,intracellular;GO:0016020,membrane;GO:0030139,endocytic vesicle;GO:0005768,endosome;GO:0044425,membrane part;GO:0044424,intracellular part;GO:0030665,clathrin coated vesicle membrane;GO:0043226,organelle;GO:0005737,cytoplasm;GO…	GO:0005488,binding;GO:0005515,protein binding;GO:0051020,GTPase binding;GO:0005083,small GTPase regulator activity;GO:0022892,substrate-specific transporter activity;GO:0031267,small GTPase binding;GO:0019894,kinesin binding;GO:0005215,transporter activity;GO:0008092,cytoskeletal protein binding;GO:0030234,enzyme regulator activity;GO:0060589,nucleoside-triphosphatase regulator activity;GO:001989…	ko04142,Lysosome
691	sp|Q14677|EPN4_HUMAN	Clathrin interactor 1 OS=Homo sapiens OX=9606 GN=CLINT1 PE=1 SV=1		down	1	0.754288	0.0443557	establishment of localization;cellular process;localization;cellular component organization or biogenesis	membrane-enclosed lumen;organelle;cell part;organelle part;cell	binding		Endocytosis	GO:0051641,cellular localization;GO:0051179,localization;GO:0006892,post-Golgi vesicle-mediated transport;GO:0048193,Golgi vesicle transport;GO:0009987,cellular process;GO:0046907,intracellular transport;GO:0051649,establishment of localization in cell;GO:0016192,vesicle-mediated transport;GO:0006810,transport;GO:0051234,establishment of localization	GO:0005623,cell;GO:0043233,organelle lumen;GO:0044444,cytoplasmic part;GO:0044428,nuclear part;GO:0031974,membrane-enclosed lumen;GO:0005622,intracellular;GO:0005794,Golgi apparatus;GO:0016020,membrane;GO:0031982,vesicle;GO:0005802,trans-Golgi network;GO:0044422,organelle part;GO:0031981,nuclear lumen;GO:0044431,Golgi apparatus part;GO:0005829,cytosol;GO:0005654,nucleoplasm;GO:0031988,membrane-bo…	GO:0005515,protein binding;GO:0005488,binding	ko04144,Endocytosis
692	sp|Q9Y3Z3|SAMH1_HUMAN	Deoxynucleoside triphosphate triphosphohydrolase SAMHD1 OS=Homo sapiens OX=9606 GN=SAMHD1 PE=1 SV=2		down	1	0.669063	0.00620354	metabolic process;regulation of biological process;cellular component organization or biogenesis;response to stimulus;biological regulation;immune system process;cellular process;signaling;multi-organism process	cell part;organelle part;organelle;membrane-enclosed lumen;cell	binding;catalytic activity	General function prediction only ;		GO:0050794,regulation of cellular process;GO:0006952,defense response;GO:0051259,protein oligomerization;GO:0009262,deoxyribonucleotide metabolic process;GO:0065007,biological regulation;GO:0046483,heterocycle metabolic process;GO:0005996,monosaccharide metabolic process;GO:0055086,nucleobase, nucleoside and nucleotide metabolic process;GO:0009607,response to biotic stimulus;GO:0043933,macromolec…	GO:0016020,membrane;GO:0005622,intracellular;GO:0044428,nuclear part;GO:0031974,membrane-enclosed lumen;GO:0031981,nuclear lumen;GO:0044422,organelle part;GO:0043233,organelle lumen;GO:0005623,cell;GO:0005886,plasma membrane;GO:0044464,cell part;GO:0044446,intracellular organelle part;GO:0070013,intracellular organelle lumen;GO:0043229,intracellular organelle;GO:0043226,organelle;GO:0044424,intra…	GO:0008270,zinc ion binding;GO:0017076,purine nucleotide binding;GO:0016788,hydrolase activity, acting on ester bonds;GO:0019001,guanyl nucleotide binding;GO:0000166,nucleotide binding;GO:0043169,cation binding;GO:0046914,transition metal ion binding;GO:0003723,RNA binding;GO:0042578,phosphoric ester hydrolase activity;GO:0016787,hydrolase activity;GO:0003824,catalytic activity;GO:0005515,protein…
704	sp|Q86UE4|LYRIC_HUMAN	Protein LYRIC OS=Homo sapiens OX=9606 GN=MTDH PE=1 SV=2		down	1	0.719908	0.00823368	metabolic process;developmental process;death;positive regulation of biological process;biological regulation;response to stimulus;cellular component organization or biogenesis;regulation of biological process;cellular process;multicellular organismal process;negative regulation of biological process;signaling;multi-organism process	cell part;organelle part;organelle;membrane-enclosed lumen;cell	protein binding transcription factor activity;binding			GO:0031324,negative regulation of cellular metabolic process;GO:0051091,positive regulation of transcription factor activity;GO:0060548,negative regulation of cell death;GO:0009893,positive regulation of metabolic process;GO:0042981,regulation of apoptosis;GO:0031326,regulation of cellular biosynthetic process;GO:0007166,cell surface receptor linked signal transduction;GO:0009987,cellular process…	GO:0045177,apical part of cell;GO:0043296,apical junction complex;GO:0016327,apicolateral plasma membrane;GO:0005622,intracellular;GO:0031974,membrane-enclosed lumen;GO:0005783,endoplasmic reticulum;GO:0016020,membrane;GO:0044422,organelle part;GO:0044432,endoplasmic reticulum part;GO:0016604,nuclear body;GO:0031981,nuclear lumen;GO:0031965,nuclear membrane;GO:0042175,nuclear envelope-endoplasmic…	GO:0003676,nucleic acid binding;GO:0008134,transcription factor binding;GO:0003723,RNA binding;GO:0030528,transcription regulator activity;GO:0005515,protein binding;GO:0005488,binding;GO:0016563,transcription activator activity;GO:0003725,double-stranded RNA binding;GO:0003713,transcription coactivator activity;GO:0051059,NF-kappaB binding;GO:0003712,transcription cofactor activity
713	sp|O43175|SERA_HUMAN	D-3-phosphoglycerate dehydrogenase OS=Homo sapiens OX=9606 GN=PHGDH PE=1 SV=4		down	1	0.676054	0.00677538	metabolic process;developmental process;cellular component organization or biogenesis;regulation of biological process;biological regulation;cellular process;negative regulation of biological process;multicellular organismal process	cell part;extracellular region part;organelle;extracellular region;cell	electron carrier activity;catalytic activity;binding	Coenzyme transport and metabolism ; Amino acid transport and metabolism ;	Glycine, serine and threonine metabolism;Metabolic pathways;Microbial metabolism in diverse environments	GO:0048468,cell development;GO:0044238,primary metabolic process;GO:0022008,neurogenesis;GO:0006575,cellular amino acid derivative metabolic process;GO:0007420,brain development;GO:0006807,nitrogen compound metabolic process;GO:0009070,serine family amino acid biosynthetic process;GO:0022402,cell cycle process;GO:0048731,system development;GO:0065007,biological regulation;GO:0046394,carboxylic ac…	GO:0005886,plasma membrane;GO:0005623,cell;GO:0043230,extracellular organelle;GO:0031982,vesicle;GO:0044444,cytoplasmic part;GO:0005622,intracellular;GO:0016020,membrane;GO:0044421,extracellular region part;GO:0031988,membrane-bounded vesicle;GO:0065010,extracellular membrane-bounded organelle;GO:0043209,myelin sheath;GO:0043227,membrane-bounded organelle;GO:0005829,cytosol;GO:0070062,extracellul…	GO:0048037,cofactor binding;GO:0003824,catalytic activity;GO:0009055,electron carrier activity;GO:0050662,coenzyme binding;GO:0016616,oxidoreductase activity, acting on the CH-OH group of donors, NAD or NADP as acceptor;GO:0005488,binding;GO:0016614,oxidoreductase activity, acting on CH-OH group of donors;GO:0016491,oxidoreductase activity;GO:0051287,NAD or NADH binding;GO:0000166,nucleotide bind…	ko01120,Microbial metabolism in diverse environments;ko01100,Metabolic pathways;ko00260,Glycine, serine and threonine metabolism
729	sp|Q14978|NOLC1_HUMAN	Nucleolar and coiled-body phosphoprotein 1 OS=Homo sapiens OX=9606 GN=NOLC1 PE=1 SV=2		up	1	1.26544	0.000147861	cellular process;cellular component organization or biogenesis	cell part;organelle part;membrane-enclosed lumen;organelle;cell	binding			GO:0006996,organelle organization;GO:0006997,nucleus organization;GO:0016043,cellular component organization;GO:0009987,cellular process	GO:0005622,intracellular;GO:0044428,nuclear part;GO:0031974,membrane-enclosed lumen;GO:0044451,nucleoplasm part;GO:0044422,organelle part;GO:0016604,nuclear body;GO:0031981,nuclear lumen;GO:0015030,Cajal body;GO:0005623,cell;GO:0043233,organelle lumen;GO:0044446,intracellular organelle part;GO:0070013,intracellular organelle lumen;GO:0043232,intracellular non-membrane-bounded organelle;GO:0044464…	GO:0017076,purine nucleotide binding;GO:0001882,nucleoside binding;GO:0000166,nucleotide binding;GO:0001883,purine nucleoside binding;GO:0032553,ribonucleotide binding;GO:0032555,purine ribonucleotide binding;GO:0005488,binding
743	sp|Q9Y2T3|GUAD_HUMAN	Guanine deaminase OS=Homo sapiens OX=9606 GN=GDA PE=1 SV=1		down	1	0.599537	0.00337695	cellular process;multicellular organismal process;positive regulation of biological process;developmental process;metabolic process;biological regulation;cellular component organization or biogenesis;regulation of biological process	cell;extracellular region;extracellular region part;cell part;organelle	binding;catalytic activity	Nucleotide transport and metabolism ; General function prediction only ;	Purine metabolism;Metabolic pathways	GO:0051128,regulation of cellular component organization;GO:0046700,heterocycle catabolic process;GO:0009056,catabolic process;GO:0043254,regulation of protein complex assembly;GO:0048856,anatomical structure development;GO:0051247,positive regulation of protein metabolic process;GO:0051246,regulation of protein metabolic process;GO:0006195,purine nucleotide catabolic process;GO:0032270,positive …	GO:0005829,cytosol;GO:0065010,extracellular membrane-bounded organelle;GO:0031988,membrane-bounded vesicle;GO:0043227,membrane-bounded organelle;GO:0044464,cell part;GO:0005576,extracellular region;GO:0044424,intracellular part;GO:0043226,organelle;GO:0070062,extracellular vesicular exosome;GO:0005737,cytoplasm;GO:0005623,cell;GO:0043230,extracellular organelle;GO:0005622,intracellular;GO:0044444…	GO:0005488,binding;GO:0019239,deaminase activity;GO:0046872,metal ion binding;GO:0043169,cation binding;GO:0046914,transition metal ion binding;GO:0016814,hydrolase activity, acting on carbon-nitrogen (but not peptide) bonds, in cyclic amidines;GO:0043167,ion binding;GO:0008270,zinc ion binding;GO:0016787,hydrolase activity;GO:0003824,catalytic activity;GO:0016810,hydrolase activity, acting on ca…	ko01100,Metabolic pathways;ko00230,Purine metabolism
749	sp|O00154|BACH_HUMAN	Cytosolic acyl coenzyme A thioester hydrolase OS=Homo sapiens OX=9606 GN=ACOT7 PE=1 SV=3		down	1	0.772473	0.0435117	metabolic process;cellular process	organelle;membrane-enclosed lumen;organelle part;extracellular region part;cell part;extracellular region;cell	catalytic activity;binding	Lipid transport and metabolism ;	Biosynthesis of unsaturated fatty acids	GO:0006807,nitrogen compound metabolic process;GO:0009119,ribonucleoside metabolic process;GO:0016054,organic acid catabolic process;GO:0051188,cofactor biosynthetic process;GO:0006752,group transfer coenzyme metabolic process;GO:0019432,triglyceride biosynthetic process;GO:0006631,fatty acid metabolic process;GO:0044238,primary metabolic process;GO:0046128,purine ribonucleoside metabolic process…	GO:0005739,mitochondrion;GO:0005623,cell;GO:0043233,organelle lumen;GO:0043230,extracellular organelle;GO:0031981,nuclear lumen;GO:0044422,organelle part;GO:0031982,vesicle;GO:0044421,extracellular region part;GO:0031974,membrane-enclosed lumen;GO:0044444,cytoplasmic part;GO:0044428,nuclear part;GO:0043005,neuron projection;GO:0005622,intracellular;GO:0043227,membrane-bounded organelle;GO:0043231…	GO:0005488,binding;GO:0005515,protein binding;GO:0016790,thiolester hydrolase activity;GO:0016787,hydrolase activity;GO:0042803,protein homodimerization activity;GO:0003824,catalytic activity;GO:0046983,protein dimerization activity;GO:0016788,hydrolase activity, acting on ester bonds;GO:0042802,identical protein binding	ko01040,Biosynthesis of unsaturated fatty acids
774	sp|Q9Y6K5|OAS3_HUMAN	2'-5'-oligoadenylate synthase 3 OS=Homo sapiens OX=9606 GN=OAS3 PE=1 SV=3		down	1	0.616769	0.00692301	response to stimulus;viral reproduction;biological regulation;immune system process;regulation of biological process;reproduction;metabolic process;reproductive process;signaling;multi-organism process;negative regulation of biological process;cellular process	extracellular region;cell;organelle part;cell part;extracellular region part;organelle;membrane-enclosed lumen	binding;catalytic activity		Hepatitis C	GO:0051336,regulation of hydrolase activity;GO:0002376,immune system process;GO:0019221,cytokine-mediated signaling pathway;GO:0009615,response to virus;GO:0050896,response to stimulus;GO:0051704,multi-organism process;GO:0007154,cell communication;GO:0006950,response to stress;GO:0051607,defense response to virus;GO:0048525,negative regulation of viral reproduction;GO:0065009,regulation of molec…	GO:0044444,cytoplasmic part;GO:0031974,membrane-enclosed lumen;GO:0044428,nuclear part;GO:0005622,intracellular;GO:0016020,membrane;GO:0044421,extracellular region part;GO:0044422,organelle part;GO:0031981,nuclear lumen;GO:0005623,cell;GO:0043233,organelle lumen;GO:0005886,plasma membrane;GO:0044446,intracellular organelle part;GO:0070013,intracellular organelle lumen;GO:0044464,cell part;GO:0005…	GO:0005524,ATP binding;GO:0032553,ribonucleotide binding;GO:0017076,purine nucleotide binding;GO:0001883,purine nucleoside binding;GO:0043169,cation binding;GO:0000166,nucleotide binding;GO:0032559,adenyl ribonucleotide binding;GO:0003723,RNA binding;GO:0016779,nucleotidyltransferase activity;GO:0016772,transferase activity, transferring phosphorus-containing groups;GO:0032555,purine ribonucleoti…	ko05160,Hepatitis C
779	sp|Q8NC51|PAIRB_HUMAN	Plasminogen activator inhibitor 1 RNA-binding protein OS=Homo sapiens OX=9606 GN=SERBP1 PE=1 SV=2		up	1	1.94713	0.000158626	regulation of biological process;biological regulation	extracellular region;cell;cell part;extracellular region part;organelle	binding			GO:0065007,biological regulation;GO:0050789,regulation of biological process	GO:0005737,cytoplasm;GO:0070062,extracellular vesicular exosome;GO:0031982,vesicle;GO:0043226,organelle;GO:0044424,intracellular part;GO:0044464,cell part;GO:0005576,extracellular region;GO:0016020,membrane;GO:0044421,extracellular region part;GO:0005622,intracellular;GO:0043227,membrane-bounded organelle;GO:0031988,membrane-bounded vesicle;GO:0065010,extracellular membrane-bounded organelle;GO:0…	GO:0003729,mRNA binding;GO:0005488,binding;GO:0005515,protein binding;GO:0003676,nucleic acid binding;GO:0003723,RNA binding
787	sp|Q99873|ANM1_HUMAN	Protein arginine N-methyltransferase 1 OS=Homo sapiens OX=9606 GN=PRMT1 PE=1 SV=3		up	1	1.30897	0.0341664	positive regulation of biological process;metabolic process;developmental process;regulation of biological process;cellular component organization or biogenesis;response to stimulus;biological regulation;immune system process;cellular process;signaling;negative regulation of biological process;multicellular organismal process	macromolecular complex;cell;organelle;membrane-enclosed lumen;organelle part;cell part	protein binding transcription factor activity;binding;catalytic activity	Secondary metabolites biosynthesis, transport and catabolism ; General function prediction only ;		GO:0045638,negative regulation of myeloid cell differentiation;GO:0060255,regulation of macromolecule metabolic process;GO:0010604,positive regulation of macromolecule metabolic process;GO:0051252,regulation of RNA metabolic process;GO:0006730,one-carbon metabolic process;GO:0030030,cell projection organization;GO:0050793,regulation of developmental process;GO:0045596,negative regulation of cell …	GO:0005654,nucleoplasm;GO:0005829,cytosol;GO:0032991,macromolecular complex;GO:0043227,membrane-bounded organelle;GO:0043231,intracellular membrane-bounded organelle;GO:0044464,cell part;GO:0044446,intracellular organelle part;GO:0070013,intracellular organelle lumen;GO:0043229,intracellular organelle;GO:0005737,cytoplasm;GO:0005634,nucleus;GO:0043226,organelle;GO:0044424,intracellular part;GO:00…	GO:0003713,transcription coactivator activity;GO:0003824,catalytic activity;GO:0016740,transferase activity;GO:0008757,S-adenosylmethionine-dependent methyltransferase activity;GO:0030528,transcription regulator activity;GO:0003676,nucleic acid binding;GO:0008168,methyltransferase activity;GO:0019901,protein kinase binding;GO:0016563,transcription activator activity;GO:0016741,transferase activit…
793	sp|Q9Y2J8|PADI2_HUMAN	Protein-arginine deiminase type-2 OS=Homo sapiens OX=9606 GN=PADI2 PE=1 SV=2		down	1	0.614988	0.00226116	positive regulation of biological process;developmental process;metabolic process;response to stimulus;biological regulation;regulation of biological process;cellular component organization or biogenesis;cellular process;signaling;multicellular organismal process;negative regulation of biological process	cell;extracellular region;extracellular region part;organelle part;cell part;organelle	binding;catalytic activity			GO:0030518,steroid hormone receptor signaling pathway;GO:0031323,regulation of cellular metabolic process;GO:0050794,regulation of cellular process;GO:0048731,system development;GO:0065007,biological regulation;GO:0019219,regulation of nucleobase, nucleoside, nucleotide and nucleic acid metabolic process;GO:0051276,chromosome organization;GO:0048518,positive regulation of biological process;GO:00…	GO:0005622,intracellular;GO:0044421,extracellular region part;GO:0044464,cell part;GO:0005576,extracellular region;GO:0031982,vesicle;GO:0043226,organelle;GO:0044424,intracellular part;GO:0070062,extracellular vesicular exosome;GO:0005737,cytoplasm;GO:0005623,cell;GO:0043230,extracellular organelle;GO:0065010,extracellular membrane-bounded organelle;GO:0031988,membrane-bounded vesicle;GO:0043227,…	GO:0051427,hormone receptor binding;GO:0030331,estrogen receptor binding;GO:0016787,hydrolase activity;GO:0035257,nuclear hormone receptor binding;GO:0016810,hydrolase activity, acting on carbon-nitrogen (but not peptide) bonds;GO:0003824,catalytic activity;GO:0046872,metal ion binding;GO:0005102,receptor binding;GO:0035258,steroid hormone receptor binding;GO:0005488,binding;GO:0005515,protein bi…
803	sp|P78316|NOP14_HUMAN	Nucleolar protein 14 OS=Homo sapiens OX=9606 GN=NOP14 PE=1 SV=3		up	1	1.23697	0.0259592	cellular component organization or biogenesis;metabolic process;cellular process	macromolecular complex;cell;organelle;membrane-enclosed lumen;cell part;organelle part	binding			GO:0044260,cellular macromolecule metabolic process;GO:0006807,nitrogen compound metabolic process;GO:0010467,gene expression;GO:0006396,RNA processing;GO:0000462,maturation of SSU-rRNA from tricistronic rRNA transcript (SSU-rRNA, 5.8S rRNA, LSU-rRNA);GO:0006139,nucleobase, nucleoside, nucleotide and nucleic acid metabolic process;GO:0044085,cellular component biogenesis;GO:0034960,cellular biopo…	GO:0005623,cell;GO:0043233,organelle lumen;GO:0005739,mitochondrion;GO:0044444,cytoplasmic part;GO:0044428,nuclear part;GO:0031974,membrane-enclosed lumen;GO:0005622,intracellular;GO:0016020,membrane;GO:0030529,ribonucleoprotein complex;GO:0043234,protein complex;GO:0044422,organelle part;GO:0031981,nuclear lumen;GO:0032991,macromolecular complex;GO:0044452,nucleolar part;GO:0030686,90S preriboso…	GO:0003723,RNA binding;GO:0030515,snoRNA binding;GO:0003676,nucleic acid binding;GO:0005515,protein binding;GO:0019899,enzyme binding;GO:0005488,binding
804	sp|P15121|ALDR_HUMAN	Aldo-keto reductase family 1 member B1 OS=Homo sapiens OX=9606 GN=AKR1B1 PE=1 SV=3		up	1	1.34845	0.0013559	cell proliferation;signaling;multi-organism process;reproductive process;multicellular organismal process;cellular process;regulation of biological process;reproduction;response to stimulus;biological regulation;positive regulation of biological process;metabolic process;developmental process	cell;extracellular region;organelle;membrane-enclosed lumen;extracellular region part;organelle part;cell part	electron carrier activity;catalytic activity	General function prediction only ;	Pentose and glucuronate interconversions;Pyruvate metabolism;Glycerolipid metabolism;Metabolic pathways;Fructose and mannose metabolism;Galactose metabolism	GO:0019319,hexose biosynthetic process;GO:0044238,primary metabolic process;GO:0009628,response to abiotic stimulus;GO:0008284,positive regulation of cell proliferation;GO:0006807,nitrogen compound metabolic process;GO:0048609,reproductive process in a multicellular organism;GO:0006575,cellular amino acid derivative metabolic process;GO:0010817,regulation of hormone levels;GO:0034754,cellular hor…	GO:0005622,intracellular;GO:0031974,membrane-enclosed lumen;GO:0044421,extracellular region part;GO:0016020,membrane;GO:0044422,organelle part;GO:0005773,vacuole;GO:0031981,nuclear lumen;GO:0042629,mast cell granule;GO:0044446,intracellular organelle part;GO:0070013,intracellular organelle lumen;GO:0044464,cell part;GO:0043226,organelle;GO:0044424,intracellular part;GO:0044425,membrane part;GO:00…	GO:0016491,oxidoreductase activity;GO:0016903,oxidoreductase activity, acting on the aldehyde or oxo group of donors;GO:0016614,oxidoreductase activity, acting on CH-OH group of donors;GO:0009055,electron carrier activity;GO:0003824,catalytic activity;GO:0016616,oxidoreductase activity, acting on the CH-OH group of donors, NAD or NADP as acceptor	ko01100,Metabolic pathways;ko00620,Pyruvate metabolism;ko00052,Galactose metabolism;ko00040,Pentose and glucuronate interconversions;ko00051,Fructose and mannose metabolism;ko00561,Glycerolipid metabolism
807	sp|P27348|1433T_HUMAN	14-3-3 protein theta OS=Homo sapiens OX=9606 GN=YWHAQ PE=1 SV=1		down	1	0.761474	0.0036342	localization;signaling;negative regulation of biological process;multicellular organismal process;cellular process;regulation of biological process;response to stimulus;biological regulation;establishment of localization;metabolic process;developmental process	organelle;organelle part;extracellular region part;cell part;macromolecular complex;extracellular region;cell	binding;catalytic activity	Signal transduction mechanisms ;	Cell cycle;Pathogenic Escherichia coli infection;Oocyte meiosis;Neurotrophin signaling pathway	GO:0043269,regulation of ion transport;GO:0007399,nervous system development;GO:0010605,negative regulation of macromolecule metabolic process;GO:0006355,regulation of transcription, DNA-dependent;GO:0009059,macromolecule biosynthetic process;GO:0006139,nucleobase, nucleoside, nucleotide and nucleic acid metabolic process;GO:0043271,negative regulation of ion transport;GO:0010467,gene expression;…	GO:0005576,extracellular region;GO:0044459,plasma membrane part;GO:0043229,intracellular organelle;GO:0016023,cytoplasmic membrane-bounded vesicle;GO:0005912,adherens junction;GO:0070062,extracellular vesicular exosome;GO:0030055,cell-substrate junction;GO:0044433,cytoplasmic vesicle part;GO:0043231,intracellular membrane-bounded organelle;GO:0065010,extracellular membrane-bounded organelle;GO:00…	GO:0016491,oxidoreductase activity;GO:0005488,binding;GO:0005515,protein binding;GO:0008022,protein C-terminus binding;GO:0003824,catalytic activity;GO:0047485,protein N-terminus binding;GO:0019904,protein domain specific binding	ko04110,Cell cycle;ko05130,Pathogenic Escherichia coli infection;ko04114,Oocyte meiosis;ko04722,Neurotrophin signaling pathway
810	sp|Q14789|GOGB1_HUMAN	Golgin subfamily B member 1 OS=Homo sapiens OX=9606 GN=GOLGB1 PE=1 SV=2		down	1	0.810822	0.0136259	establishment of localization;metabolic process;cellular process;localization;cellular component organization or biogenesis	organelle;cell part;organelle part;cell	binding			GO:0051641,cellular localization;GO:0019538,protein metabolic process;GO:0009987,cellular process;GO:0043170,macromolecule metabolic process;GO:0044267,cellular protein metabolic process;GO:0008152,metabolic process;GO:0006810,transport;GO:0006464,protein modification process;GO:0009100,glycoprotein metabolic process;GO:0051179,localization;GO:0034960,cellular biopolymer metabolic process;GO:0044…	GO:0016021,integral to membrane;GO:0005793,ER-Golgi intermediate compartment;GO:0005795,Golgi stack;GO:0043231,intracellular membrane-bounded organelle;GO:0043227,membrane-bounded organelle;GO:0000139,Golgi membrane;GO:0044464,cell part;GO:0044446,intracellular organelle part;GO:0043229,intracellular organelle;GO:0005737,cytoplasm;GO:0044424,intracellular part;GO:0043226,organelle;GO:0044425,memb…	GO:0005488,binding;GO:0005515,protein binding
822	sp|Q9NTK5|OLA1_HUMAN	Obg-like ATPase 1 OS=Homo sapiens OX=9606 GN=OLA1 PE=1 SV=2		up	1	1.23633	0.0435341	cellular process;metabolic process	organelle part;cell part;extracellular region part;membrane-enclosed lumen;organelle;extracellular region;cell	binding;catalytic activity	Translation, ribosomal structure and biogenesis ;		GO:0006753,nucleoside phosphate metabolic process;GO:0009117,nucleotide metabolic process;GO:0006163,purine nucleotide metabolic process;GO:0006139,nucleobase, nucleoside, nucleotide and nucleic acid metabolic process;GO:0046034,ATP metabolic process;GO:0009259,ribonucleotide metabolic process;GO:0006807,nitrogen compound metabolic process;GO:0009119,ribonucleoside metabolic process;GO:0046128,pu…	GO:0031988,membrane-bounded vesicle;GO:0043227,membrane-bounded organelle;GO:0005730,nucleolus;GO:0005813,centrosome;GO:0043226,organelle;GO:0044424,intracellular part;GO:0005737,cytoplasm;GO:0070013,intracellular organelle lumen;GO:0044446,intracellular organelle part;GO:0044464,cell part;GO:0015630,microtubule cytoskeleton;GO:0044422,organelle part;GO:0005815,microtubule organizing center;GO:00…	GO:0016818,hydrolase activity, acting on acid anhydrides, in phosphorus-containing anhydrides;GO:0016887,ATPase activity;GO:0032561,guanyl ribonucleotide binding;GO:0019001,guanyl nucleotide binding;GO:0043022,ribosome binding;GO:0017076,purine nucleotide binding;GO:0016462,pyrophosphatase activity;GO:0032553,ribonucleotide binding;GO:0005524,ATP binding;GO:0017111,nucleoside-triphosphatase activ…
830	sp|Q9UKD2|MRT4_HUMAN	mRNA turnover protein 4 homolog OS=Homo sapiens OX=9606 GN=MRTO4 PE=1 SV=2		up	1	1.54913	0.0122541	cellular component organization or biogenesis;cellular process	cell;macromolecular complex;membrane-enclosed lumen;organelle;cell part;organelle part	binding	Translation, ribosomal structure and biogenesis ;	Ribosome	GO:0009987,cellular process;GO:0042254,ribosome biogenesis;GO:0022613,ribonucleoprotein complex biogenesis;GO:0044085,cellular component biogenesis	GO:0005622,intracellular;GO:0031974,membrane-enclosed lumen;GO:0016020,membrane;GO:0044422,organelle part;GO:0031981,nuclear lumen;GO:0031965,nuclear membrane;GO:0032991,macromolecular complex;GO:0005654,nucleoplasm;GO:0031967,organelle envelope;GO:0005840,ribosome;GO:0005730,nucleolus;GO:0043227,membrane-bounded organelle;GO:0005635,nuclear envelope;GO:0031975,envelope;GO:0044446,intracellular o…	GO:0005488,binding;GO:0005515,protein binding	ko03010,Ribosome
834	sp|Q9BVJ6|UT14A_HUMAN	U3 small nucleolar RNA-associated protein 14 homolog A OS=Homo sapiens OX=9606 GN=UTP14A PE=1 SV=1		up	1	1.37973	0.0344207	cellular process;multicellular organismal process;cellular component organization or biogenesis	macromolecular complex;cell;organelle;membrane-enclosed lumen;cell part;organelle part	binding	Function unknown ;		GO:0032501,multicellular organismal process;GO:0044085,cellular component biogenesis;GO:0009987,cellular process;GO:0042254,ribosome biogenesis;GO:0022613,ribonucleoprotein complex biogenesis	GO:0031981,nuclear lumen;GO:0030529,ribonucleoprotein complex;GO:0044422,organelle part;GO:0044428,nuclear part;GO:0031974,membrane-enclosed lumen;GO:0005622,intracellular;GO:0043233,organelle lumen;GO:0005623,cell;GO:0043229,intracellular organelle;GO:0030684,preribosome;GO:0005634,nucleus;GO:0043228,non-membrane-bounded organelle;GO:0044424,intracellular part;GO:0043226,organelle;GO:0043232,int…	GO:0005488,binding;GO:0005515,protein binding
853	sp|P63241|IF5A1_HUMAN	Eukaryotic translation initiation factor 5A-1 OS=Homo sapiens OX=9606 GN=EIF5A PE=1 SV=2		up	1	1.50967	0.0157641	localization;cell proliferation;cellular process;cellular component organization or biogenesis;regulation of biological process;biological regulation;positive regulation of biological process;establishment of localization;metabolic process;death	extracellular region;cell;macromolecular complex;organelle;extracellular region part;organelle part;cell part	binding	Translation, ribosomal structure and biogenesis ;		GO:0051234,establishment of localization;GO:0009059,macromolecule biosynthetic process;GO:0043284,biopolymer biosynthetic process;GO:0010941,regulation of cell death;GO:0010467,gene expression;GO:0018193,peptidyl-amino acid modification;GO:0010557,positive regulation of macromolecule biosynthetic process;GO:0051028,mRNA transport;GO:0015931,nucleobase, nucleoside, nucleotide and nucleic acid tran…	GO:0043234,protein complex;GO:0044422,organelle part;GO:0044432,endoplasmic reticulum part;GO:0044421,extracellular region part;GO:0005783,endoplasmic reticulum;GO:0016020,membrane;GO:0005622,intracellular;GO:0005737,cytoplasm;GO:0043226,organelle;GO:0044424,intracellular part;GO:0044425,membrane part;GO:0044464,cell part;GO:0031975,envelope;GO:0044446,intracellular organelle part;GO:0043227,memb…	GO:0008135,translation factor activity, nucleic acid binding;GO:0043022,ribosome binding;GO:0045182,translation regulator activity;GO:0017069,snRNA binding;GO:0003743,translation initiation factor activity;GO:0043021,ribonucleoprotein binding;GO:0003746,translation elongation factor activity;GO:0003723,RNA binding;GO:0047485,protein N-terminus binding;GO:0003676,nucleic acid binding;GO:0017070,U6…
856	sp|Q9BYK8|HELZ2_HUMAN	Helicase with zinc finger domain 2 OS=Homo sapiens OX=9606 GN=HELZ2 PE=1 SV=6		down	1	0.653951	0.00109011	regulation of biological process;biological regulation;cellular process;metabolic process;positive regulation of biological process	organelle;membrane-enclosed lumen;cell part;organelle part;cell	catalytic activity;binding;protein binding transcription factor activity	Replication, recombination and repair ;Transcription ;	RNA transport	GO:0051254,positive regulation of RNA metabolic process;GO:0044237,cellular metabolic process;GO:0051171,regulation of nitrogen compound metabolic process;GO:0019222,regulation of metabolic process;GO:0009889,regulation of biosynthetic process;GO:0045935,positive regulation of nucleobase, nucleoside, nucleotide and nucleic acid metabolic process;GO:0045893,positive regulation of transcription, DN…	GO:0005654,nucleoplasm;GO:0043227,membrane-bounded organelle;GO:0043231,intracellular membrane-bounded organelle;GO:0044446,intracellular organelle part;GO:0070013,intracellular organelle lumen;GO:0044464,cell part;GO:0043226,organelle;GO:0005634,nucleus;GO:0044424,intracellular part;GO:0043229,intracellular organelle;GO:0005623,cell;GO:0043233,organelle lumen;GO:0044428,nuclear part;GO:0031974,m…	GO:0000166,nucleotide binding;GO:0043169,cation binding;GO:0001883,purine nucleoside binding;GO:0003677,DNA binding;GO:0032559,adenyl ribonucleotide binding;GO:0008134,transcription factor binding;GO:0003712,transcription cofactor activity;GO:0017111,nucleoside-triphosphatase activity;GO:0005524,ATP binding;GO:0032553,ribonucleotide binding;GO:0017076,purine nucleotide binding;GO:0016462,pyrophos…	ko03013,RNA transport
857	sp|Q15293|RCN1_HUMAN	Reticulocalbin-1 OS=Homo sapiens OX=9606 GN=RCN1 PE=1 SV=1		down	1	0.730789	0.00634669	multicellular organismal process;developmental process	cell part;organelle part;membrane-enclosed lumen;organelle;cell	binding			GO:0007423,sensory organ development;GO:0009792,embryonic development ending in birth or egg hatching;GO:0043010,camera-type eye development;GO:0048513,organ development;GO:0009790,embryonic development;GO:0001654,eye development;GO:0007275,multicellular organismal development;GO:0032501,multicellular organismal process;GO:0048731,system development;GO:0001701,in utero embryonic development;GO:00…	GO:0043233,organelle lumen;GO:0005623,cell;GO:0044422,organelle part;GO:0044432,endoplasmic reticulum part;GO:0005622,intracellular;GO:0031974,membrane-enclosed lumen;GO:0044444,cytoplasmic part;GO:0005783,endoplasmic reticulum;GO:0043231,intracellular membrane-bounded organelle;GO:0043227,membrane-bounded organelle;GO:0043226,organelle;GO:0044424,intracellular part;GO:0005788,endoplasmic reticul…	GO:0043169,cation binding;GO:0005509,calcium ion binding;GO:0005488,binding;GO:0005515,protein binding;GO:0046872,metal ion binding;GO:0043167,ion binding
858	sp|P40121|CAPG_HUMAN	Macrophage-capping protein OS=Homo sapiens OX=9606 GN=CAPG PE=1 SV=2		down	1	0.65393	0.0301655	cellular process;positive regulation of biological process;cellular component organization or biogenesis;regulation of biological process;biological regulation;negative regulation of biological process	macromolecular complex;cell;extracellular region;cell part;extracellular region part;organelle;organelle part;membrane-enclosed lumen	binding			GO:0030833,regulation of actin filament polymerization;GO:0010639,negative regulation of organelle organization;GO:0010605,negative regulation of macromolecule metabolic process;GO:0043062,extracellular structure organization;GO:0009892,negative regulation of metabolic process;GO:0010926,anatomical structure formation;GO:0043244,regulation of protein complex disassembly;GO:0051016,barbed-end acti…	GO:0043231,intracellular membrane-bounded organelle;GO:0044450,microtubule organizing center part;GO:0065010,extracellular membrane-bounded organelle;GO:0005856,cytoskeleton;GO:0016023,cytoplasmic membrane-bounded vesicle;GO:0043229,intracellular organelle;GO:0070062,extracellular vesicular exosome;GO:0043228,non-membrane-bounded organelle;GO:0005634,nucleus;GO:0005576,extracellular region;GO:004…	GO:0008092,cytoskeletal protein binding;GO:0005515,protein binding;GO:0005488,binding;GO:0003779,actin binding;GO:0019904,protein domain specific binding;GO:0032403,protein complex binding
875	sp|Q7L1Q6|BZW1_HUMAN	Basic leucine zipper and W2 domain-containing protein 1 OS=Homo sapiens OX=9606 GN=BZW1 PE=1 SV=1		up	1	1.59865	0.00913054	cellular process;metabolic process;regulation of biological process;biological regulation	cell part;cell			RNA transport	GO:0065007,biological regulation;GO:0031323,regulation of cellular metabolic process;GO:0031326,regulation of cellular biosynthetic process;GO:0050794,regulation of cellular process;GO:0050789,regulation of biological process;GO:0009889,regulation of biosynthetic process;GO:0051171,regulation of nitrogen compound metabolic process;GO:0019219,regulation of nucleobase, nucleoside, nucleotide and nu…	GO:0044424,intracellular part;GO:0005737,cytoplasm;GO:0005623,cell;GO:0005622,intracellular;GO:0016020,membrane;GO:0044464,cell part		ko03013,RNA transport
880	sp|Q9Y3T9|NOC2L_HUMAN	Nucleolar complex protein 2 homolog OS=Homo sapiens OX=9606 GN=NOC2L PE=1 SV=4		up	1	1.53819	0.0132095	biological regulation;response to stimulus;cellular component organization or biogenesis;regulation of biological process;metabolic process;death;establishment of localization;negative regulation of biological process;localization;cellular process	cell;cell part;organelle part;organelle;membrane-enclosed lumen	protein binding transcription factor activity;binding	Function unknown ;		GO:0031497,chromatin assembly;GO:0010605,negative regulation of macromolecule metabolic process;GO:0006355,regulation of transcription, DNA-dependent;GO:0010639,negative regulation of organelle organization;GO:0009314,response to radiation;GO:0022607,cellular component assembly;GO:0010941,regulation of cell death;GO:0033044,regulation of chromosome organization;GO:0035065,regulation of histone ac…	GO:0043227,membrane-bounded organelle;GO:0043231,intracellular membrane-bounded organelle;GO:0005730,nucleolus;GO:0005654,nucleoplasm;GO:0043226,organelle;GO:0005634,nucleus;GO:0043228,non-membrane-bounded organelle;GO:0044424,intracellular part;GO:0005737,cytoplasm;GO:0043229,intracellular organelle;GO:0044446,intracellular organelle part;GO:0070013,intracellular organelle lumen;GO:0043232,intra…	GO:0005515,protein binding;GO:0005488,binding;GO:0042393,histone binding;GO:0003714,transcription corepressor activity;GO:0008134,transcription factor binding;GO:0003682,chromatin binding;GO:0030528,transcription regulator activity;GO:0031491,nucleosome binding;GO:0003712,transcription cofactor activity;GO:0016564,transcription repressor activity
882	sp|O14879|IFIT3_HUMAN	Interferon-induced protein with tetratricopeptide repeats 3 OS=Homo sapiens OX=9606 GN=IFIT3 PE=1 SV=1		down	1	0.3988	0.000494112	death;regulation of biological process;response to stimulus;biological regulation;immune system process;cellular process;cell proliferation;multi-organism process;signaling;negative regulation of biological process	cell part;organelle;cell	binding		Hepatitis C	GO:0050789,regulation of biological process;GO:0009607,response to biotic stimulus;GO:0060548,negative regulation of cell death;GO:0006955,immune response;GO:0042127,regulation of cell proliferation;GO:0007166,cell surface receptor linked signal transduction;GO:0009987,cellular process;GO:0065007,biological regulation;GO:0006952,defense response;GO:0051093,negative regulation of developmental pro…	GO:0043231,intracellular membrane-bounded organelle;GO:0043227,membrane-bounded organelle;GO:0005739,mitochondrion;GO:0005829,cytosol;GO:0005623,cell;GO:0043229,intracellular organelle;GO:0005737,cytoplasm;GO:0044424,intracellular part;GO:0043226,organelle;GO:0044464,cell part;GO:0005622,intracellular;GO:0044444,cytoplasmic part	GO:0003723,RNA binding;GO:0003676,nucleic acid binding;GO:0042802,identical protein binding;GO:0005488,binding;GO:0005515,protein binding	ko05160,Hepatitis C
894	sp|P09914|IFIT1_HUMAN	Interferon-induced protein with tetratricopeptide repeats 1 OS=Homo sapiens OX=9606 GN=IFIT1 PE=1 SV=2		down	1	0.284852	3.21495e-05	metabolic process;positive regulation of biological process;establishment of localization;reproduction;regulation of biological process;immune system process;biological regulation;viral reproduction;response to stimulus;cellular process;localization;negative regulation of biological process;multi-organism process;signaling;reproductive process	extracellular region;cell;cell part;extracellular region part	binding		Hepatitis C	GO:0045069,regulation of viral genome replication;GO:0050792,regulation of viral reproduction;GO:0043393,regulation of protein binding;GO:0006886,intracellular protein transport;GO:0009987,cellular process;GO:0007166,cell surface receptor linked signal transduction;GO:0002697,regulation of immune effector process;GO:0051641,cellular localization;GO:0048585,negative regulation of response to stimu…	GO:0005623,cell;GO:0005829,cytosol;GO:0044444,cytoplasmic part;GO:0005622,intracellular;GO:0005576,extracellular region;GO:0044464,cell part;GO:0044421,extracellular region part;GO:0044424,intracellular part;GO:0005737,cytoplasm	GO:0003676,nucleic acid binding;GO:0003723,RNA binding;GO:0005488,binding;GO:0005515,protein binding	ko05160,Hepatitis C
903	sp|Q13347|EIF3I_HUMAN	Eukaryotic translation initiation factor 3 subunit I OS=Homo sapiens OX=9606 GN=EIF3I PE=1 SV=1		up	1	1.30261	0.0313924	cellular process;metabolic process;developmental process;cellular component organization or biogenesis;regulation of biological process;multicellular organismal process;biological regulation	macromolecular complex;extracellular region;cell;organelle;extracellular region part;cell part	binding	General function prediction only ;	RNA transport	GO:0009987,cellular process;GO:0065007,biological regulation;GO:0032501,multicellular organismal process;GO:0048731,system development;GO:0001731,formation of translation preinitiation complex;GO:0043170,macromolecule metabolic process;GO:0065003,macromolecular complex assembly;GO:0001568,blood vessel development;GO:0050794,regulation of cellular process;GO:0031323,regulation of cellular metaboli…	GO:0016282,eukaryotic 43S preinitiation complex;GO:0005737,cytoplasm;GO:0070062,extracellular vesicular exosome;GO:0043226,organelle;GO:0044424,intracellular part;GO:0005576,extracellular region;GO:0044464,cell part;GO:0043227,membrane-bounded organelle;GO:0031988,membrane-bounded vesicle;GO:0065010,extracellular membrane-bounded organelle;GO:0005829,cytosol;GO:0032991,macromolecular complex;GO:0…	GO:0008135,translation factor activity, nucleic acid binding;GO:0045182,translation regulator activity;GO:0003676,nucleic acid binding;GO:0003743,translation initiation factor activity;GO:0005488,binding;GO:0005515,protein binding	ko03013,RNA transport
907	sp|P38159|RBMX_HUMAN	RNA-binding motif protein, X chromosome OS=Homo sapiens OX=9606 GN=RBMX PE=1 SV=3		up	1	1.85006	0.00686179	response to stimulus;biological regulation;regulation of biological process;positive regulation of biological process;metabolic process;developmental process;multicellular organismal process;cellular process	extracellular region part;cell part;organelle;cell;extracellular region;macromolecular complex;organelle part;membrane-enclosed lumen	binding	General function prediction only ;	Spliceosome	GO:0045935,positive regulation of nucleobase, nucleoside, nucleotide and nucleic acid metabolic process;GO:0009889,regulation of biosynthetic process;GO:0030163,protein catabolic process;GO:0051171,regulation of nitrogen compound metabolic process;GO:0019222,regulation of metabolic process;GO:0051254,positive regulation of RNA metabolic process;GO:0048869,cellular developmental process;GO:0045893…	GO:0043230,extracellular organelle;GO:0005623,cell;GO:0031982,vesicle;GO:0005694,chromosome;GO:0030529,ribonucleoprotein complex;GO:0044428,nuclear part;GO:0005681,spliceosomal complex;GO:0065010,extracellular membrane-bounded organelle;GO:0000228,nuclear chromosome;GO:0043231,intracellular membrane-bounded organelle;GO:0005719,nuclear euchromatin;GO:0005634,nucleus;GO:0043228,non-membrane-bounde…	GO:0003729,mRNA binding;GO:0005488,binding;GO:0005515,protein binding;GO:0003723,RNA binding;GO:0003676,nucleic acid binding;GO:0003682,chromatin binding	ko03040,Spliceosome
922	sp|O75874|IDHC_HUMAN	Isocitrate dehydrogenase [NADP] cytoplasmic OS=Homo sapiens OX=9606 GN=IDH1 PE=1 SV=2		down	1	0.710351	0.0444111	regulation of biological process;reproduction;response to stimulus;biological regulation;developmental process;metabolic process;reproductive process;multicellular organismal process;cellular process	membrane-enclosed lumen;organelle;organelle part;extracellular region part;cell part;cell;extracellular region	binding;catalytic activity	Energy production and conversion ;	Microbial metabolism in diverse environments;Citrate cycle (TCA cycle);Glutathione metabolism;Peroxisome;Metabolic pathways	GO:0048545,response to steroid hormone stimulus;GO:0046487,glyoxylate metabolic process;GO:0006081,cellular aldehyde metabolic process;GO:0046660,female sex differentiation;GO:0008585,female gonad development;GO:0044237,cellular metabolic process;GO:0019222,regulation of metabolic process;GO:0006519,cellular amino acid and derivative metabolic process;GO:0045137,development of primary sexual char…	GO:0005829,cytosol;GO:0031907,microbody lumen;GO:0005777,peroxisome;GO:0043231,intracellular membrane-bounded organelle;GO:0043227,membrane-bounded organelle;GO:0065010,extracellular membrane-bounded organelle;GO:0031988,membrane-bounded vesicle;GO:0044464,cell part;GO:0005576,extracellular region;GO:0005782,peroxisomal matrix;GO:0044446,intracellular organelle part;GO:0070013,intracellular organ…	GO:0000166,nucleotide binding;GO:0043169,cation binding;GO:0042803,protein homodimerization activity;GO:0046983,protein dimerization activity;GO:0000287,magnesium ion binding;GO:0042802,identical protein binding;GO:0016616,oxidoreductase activity, acting on the CH-OH group of donors, NAD or NADP as acceptor;GO:0043167,ion binding;GO:0005102,receptor binding;GO:0046872,metal ion binding;GO:0005515…	ko01120,Microbial metabolism in diverse environments;ko01100,Metabolic pathways;ko00480,Glutathione metabolism;ko00020,Citrate cycle (TCA cycle);ko04146,Peroxisome
929	sp|Q14019|COTL1_HUMAN	Coactosin-like protein OS=Homo sapiens OX=9606 GN=COTL1 PE=1 SV=3		up	1	1.22217	0.0261014	developmental process;response to stimulus;cellular component organization or biogenesis;cellular process;multicellular organismal process;multi-organism process;locomotion;localization	cell;extracellular region;organelle;cell part;extracellular region part	binding			GO:0006950,response to stress;GO:0032502,developmental process;GO:0040011,locomotion;GO:0010926,anatomical structure formation;GO:0006928,cell motion;GO:0009888,tissue development;GO:0048513,organ development;GO:0022607,cellular component assembly;GO:0007010,cytoskeleton organization;GO:0051704,multi-organism process;GO:0050896,response to stimulus;GO:0006461,protein complex assembly;GO:0048856,a…	GO:0043230,extracellular organelle;GO:0005623,cell;GO:0031982,vesicle;GO:0044421,extracellular region part;GO:0005622,intracellular;GO:0043227,membrane-bounded organelle;GO:0043231,intracellular membrane-bounded organelle;GO:0031988,membrane-bounded vesicle;GO:0065010,extracellular membrane-bounded organelle;GO:0005856,cytoskeleton;GO:0043229,intracellular organelle;GO:0005737,cytoplasm;GO:004442…	GO:0003779,actin binding;GO:0008092,cytoskeletal protein binding;GO:0019899,enzyme binding;GO:0005488,binding;GO:0005515,protein binding
931	sp|Q08752|PPID_HUMAN	Peptidyl-prolyl cis-trans isomerase D OS=Homo sapiens OX=9606 GN=PPID PE=1 SV=3		up	1	1.2406	0.0464461	response to stimulus;viral reproduction;biological regulation;regulation of biological process;reproduction;cellular component organization or biogenesis;establishment of localization;positive regulation of biological process;death;metabolic process;reproductive process;negative regulation of biological process;localization;cellular process	cell;organelle;membrane-enclosed lumen;cell part;organelle part	catalytic activity;binding	Posttranslational modification, protein turnover, chaperones ;	Huntington's disease;Calcium signaling pathway;Parkinson's disease	GO:0009889,regulation of biosynthetic process;GO:0043068,positive regulation of programmed cell death;GO:0044237,cellular metabolic process;GO:0048523,negative regulation of cellular process;GO:0051094,positive regulation of developmental process;GO:0019222,regulation of metabolic process;GO:0051171,regulation of nitrogen compound metabolic process;GO:0016481,negative regulation of transcription;…	GO:0005623,cell;GO:0043233,organelle lumen;GO:0005622,intracellular;GO:0044428,nuclear part;GO:0031974,membrane-enclosed lumen;GO:0031981,nuclear lumen;GO:0044422,organelle part;GO:0005654,nucleoplasm;GO:0005730,nucleolus;GO:0043231,intracellular membrane-bounded organelle;GO:0043227,membrane-bounded organelle;GO:0044464,cell part;GO:0043232,intracellular non-membrane-bounded organelle;GO:0070013…	GO:0016859,cis-trans isomerase activity;GO:0051879,Hsp90 protein binding;GO:0005102,receptor binding;GO:0005515,protein binding;GO:0005488,binding;GO:0003824,catalytic activity;GO:0008144,drug binding;GO:0016853,isomerase activity;GO:0003755,peptidyl-prolyl cis-trans isomerase activity;GO:0030331,estrogen receptor binding;GO:0008134,transcription factor binding;GO:0042277,peptide binding;GO:00310…	ko04020,Calcium signaling pathway;ko05012,Parkinson's disease;ko05016,Huntington's disease
942	sp|P20591|MX1_HUMAN	Interferon-induced GTP-binding protein Mx1 OS=Homo sapiens OX=9606 GN=MX1 PE=1 SV=4		down	1	0.135375	2.16472e-06	signaling;reproductive process;multi-organism process;negative regulation of biological process;localization;cellular process;viral reproduction;response to stimulus;biological regulation;immune system process;regulation of biological process;reproduction;metabolic process;death	organelle;cell part;organelle part;cell	binding;catalytic activity	General function prediction only ;	Bacterial invasion of epithelial cells;Endocytosis;Fc gamma R-mediated phagocytosis	GO:0048519,negative regulation of biological process;GO:0051707,response to other organism;GO:0012501,programmed cell death;GO:0045071,negative regulation of viral genome replication;GO:0007165,signal transduction;GO:0008219,cell death;GO:0006950,response to stress;GO:0002252,immune effector process;GO:0051607,defense response to virus;GO:0048525,negative regulation of viral reproduction;GO:00023…	GO:0012505,endomembrane system;GO:0005623,cell;GO:0044432,endoplasmic reticulum part;GO:0044422,organelle part;GO:0031090,organelle membrane;GO:0044444,cytoplasmic part;GO:0044428,nuclear part;GO:0005622,intracellular;GO:0016020,membrane;GO:0005783,endoplasmic reticulum;GO:0031967,organelle envelope;GO:0043231,intracellular membrane-bounded organelle;GO:0043227,membrane-bounded organelle;GO:00056…	GO:0005488,binding;GO:0005515,protein binding;GO:0016787,hydrolase activity;GO:0003824,catalytic activity;GO:0016817,hydrolase activity, acting on acid anhydrides;GO:0032555,purine ribonucleotide binding;GO:0003924,GTPase activity;GO:0005525,GTP binding;GO:0000166,nucleotide binding;GO:0016818,hydrolase activity, acting on acid anhydrides, in phosphorus-containing anhydrides;GO:0017076,purine nuc…	ko04666,Fc gamma R-mediated phagocytosis;ko04144,Endocytosis;ko05100,Bacterial invasion of epithelial cells
944	sp|P11177|ODPB_HUMAN	Pyruvate dehydrogenase E1 component subunit beta, mitochondrial OS=Homo sapiens OX=9606 GN=PDHB PE=1 SV=3		down	1	0.757849	0.0215666	metabolic process;cellular process;biological regulation;regulation of biological process	organelle part;membrane-enclosed lumen;cell part;extracellular region part;organelle;macromolecular complex;extracellular region;cell	binding;catalytic activity	Energy production and conversion ;	Microbial metabolism in diverse environments;Valine, leucine and isoleucine biosynthesis;Citrate cycle (TCA cycle);Pyruvate metabolism;Butanoate metabolism;Glycolysis / Gluconeogenesis;Metabolic pathways	GO:0019222,regulation of metabolic process;GO:0032787,monocarboxylic acid metabolic process;GO:0044237,cellular metabolic process;GO:0006081,cellular aldehyde metabolic process;GO:0009889,regulation of biosynthetic process;GO:0046487,glyoxylate metabolic process;GO:0010565,regulation of cellular ketone metabolic process;GO:0006099,tricarboxylic acid cycle;GO:0006084,acetyl-CoA metabolic process;G…	GO:0031974,membrane-enclosed lumen;GO:0005622,intracellular;GO:0044421,extracellular region part;GO:0044429,mitochondrial part;GO:0043234,protein complex;GO:0044422,organelle part;GO:0031981,nuclear lumen;GO:0005739,mitochondrion;GO:0070013,intracellular organelle lumen;GO:0044446,intracellular organelle part;GO:0044464,cell part;GO:0043226,organelle;GO:0044424,intracellular part;GO:0005737,cytop…	GO:0003824,catalytic activity;GO:0016620,oxidoreductase activity, acting on the aldehyde or oxo group of donors, NAD or NADP as acceptor;GO:0016491,oxidoreductase activity;GO:0016903,oxidoreductase activity, acting on the aldehyde or oxo group of donors;GO:0005515,protein binding;GO:0005488,binding	ko00650,Butanoate metabolism;ko01100,Metabolic pathways;ko01120,Microbial metabolism in diverse environments;ko00620,Pyruvate metabolism;ko00020,Citrate cycle (TCA cycle);ko00010,Glycolysis / Gluconeogenesis;ko00290,Valine, leucine and isoleucine biosynthesis
991	sp|P04179|SODM_HUMAN	Superoxide dismutase [Mn], mitochondrial OS=Homo sapiens OX=9606 GN=SOD2 PE=1 SV=3		up	1	2.38437	0.00746728	pigmentation;cellular process;cell proliferation;positive regulation of biological process;immune system process;response to stimulus;multicellular organismal process;negative regulation of biological process;multi-organism process;signaling;developmental process;metabolic process;death;regulation of biological process;cellular component organization or biogenesis;biological regulation	cell;extracellular region;membrane-enclosed lumen;organelle;cell part;organelle part;extracellular region part	catalytic activity;antioxidant activity;binding	Inorganic ion transport and metabolism ;	Huntington's disease;Peroxisome	GO:0065009,regulation of molecular function;GO:0010332,response to gamma radiation;GO:0009611,response to wounding;GO:0007584,response to nutrient;GO:0007005,mitochondrion organization;GO:0080090,regulation of primary metabolic process;GO:0045596,negative regulation of cell differentiation;GO:0006979,response to oxidative stress;GO:0050793,regulation of developmental process;GO:0006915,apoptosis;…	GO:0044464,cell part;GO:0031975,envelope;GO:0044446,intracellular organelle part;GO:0009295,nucleoid;GO:0070013,intracellular organelle lumen;GO:0005737,cytoplasm;GO:0044425,membrane part;GO:0044424,intracellular part;GO:0043226,organelle;GO:0043227,membrane-bounded organelle;GO:0031988,membrane-bounded vesicle;GO:0019866,organelle inner membrane;GO:0005740,mitochondrial envelope;GO:0031967,organ…	GO:0043167,ion binding;GO:0046914,transition metal ion binding;GO:0003676,nucleic acid binding;GO:0043169,cation binding;GO:0016491,oxidoreductase activity;GO:0005488,binding;GO:0003677,DNA binding;GO:0019899,enzyme binding;GO:0005515,protein binding;GO:0046872,metal ion binding;GO:0030145,manganese ion binding;GO:0003824,catalytic activity;GO:0019825,oxygen binding;GO:0042802,identical protein b…	ko05016,Huntington's disease;ko04146,Peroxisome
993	sp|Q86V48|LUZP1_HUMAN	Leucine zipper protein 1 OS=Homo sapiens OX=9606 GN=LUZP1 PE=1 SV=2		up	1	1.24127	0.0475725	developmental process;multicellular organismal process	extracellular region part;cell part;organelle;cell;extracellular region				GO:0009653,anatomical structure morphogenesis;GO:0007275,multicellular organismal development;GO:0016331,morphogenesis of embryonic epithelium;GO:0032501,multicellular organismal process;GO:0048731,system development;GO:0060562,epithelial tube morphogenesis;GO:0001841,neural tube formation;GO:0048729,tissue morphogenesis;GO:0048646,anatomical structure formation involved in morphogenesis;GO:00604…	GO:0043227,membrane-bounded organelle;GO:0043231,intracellular membrane-bounded organelle;GO:0065010,extracellular membrane-bounded organelle;GO:0031988,membrane-bounded vesicle;GO:0043229,intracellular organelle;GO:0070062,extracellular vesicular exosome;GO:0005634,nucleus;GO:0044424,intracellular part;GO:0043226,organelle;GO:0044464,cell part;GO:0005576,extracellular region;GO:0043230,extracell…
1000	sp|P30048|PRDX3_HUMAN	Thioredoxin-dependent peroxide reductase, mitochondrial OS=Homo sapiens OX=9606 GN=PRDX3 PE=1 SV=3		down	1	0.641916	0.0421286	multicellular organismal process;multi-organism process;cell proliferation;cellular process;immune system process;biological regulation;response to stimulus;cellular component organization or biogenesis;regulation of biological process;developmental process;metabolic process;death;positive regulation of biological process	organelle part;membrane-enclosed lumen;cell part;extracellular region part;organelle;macromolecular complex;cell;extracellular region	catalytic activity;antioxidant activity;enzyme regulator activity;binding	Posttranslational modification, protein turnover, chaperones ;		GO:0034614,cellular response to reactive oxygen species;GO:0009617,response to bacterium;GO:0032502,developmental process;GO:0034599,cellular response to oxidative stress;GO:0010468,regulation of gene expression;GO:0044093,positive regulation of molecular function;GO:0048513,organ development;GO:0002376,immune system process;GO:0032496,response to lipopolysaccharide;GO:0044260,cellular macromolec…	GO:0043231,intracellular membrane-bounded organelle;GO:0043209,myelin sheath;GO:0065010,extracellular membrane-bounded organelle;GO:0043229,intracellular organelle;GO:0070062,extracellular vesicular exosome;GO:0005576,extracellular region;GO:0044459,plasma membrane part;GO:0005759,mitochondrial matrix;GO:0005886,plasma membrane;GO:0043230,extracellular organelle;GO:0043233,organelle lumen;GO:0005…	GO:0016684,oxidoreductase activity, acting on peroxide as acceptor;GO:0016667,oxidoreductase activity, acting on sulfur group of donors;GO:0042802,identical protein binding;GO:0043027,caspase inhibitor activity;GO:0030414,peptidase inhibitor activity;GO:0004857,enzyme inhibitor activity;GO:0004601,peroxidase activity;GO:0019899,enzyme binding;GO:0019900,kinase binding;GO:0003824,catalytic activit…
1012	sp|P62979|RS27A_HUMAN	Ubiquitin-40S ribosomal protein S27a OS=Homo sapiens OX=9606 GN=RPS27A PE=1 SV=2		down	1	0.604031	0.0222791	cellular process;locomotion;positive regulation of biological process;establishment of localization;immune system process;response to stimulus;localization;negative regulation of biological process;multicellular organismal process;reproductive process;signaling;metabolic process;developmental process;death;rhythmic process;regulation of biological process;reproduction;cellular component organizat…	membrane-enclosed lumen;organelle part;macromolecular complex;extracellular region;cell;organelle;cell part;extracellular region part	binding;structural molecule activity	Posttranslational modification, protein turnover, chaperones ;Translation, ribosomal structure and biogenesis ;	Ribosome	GO:0022411,cellular component disassembly;GO:0080090,regulation of primary metabolic process;GO:0043412,biopolymer modification;GO:0006612,protein targeting to membrane;GO:0051340,regulation of ligase activity;GO:0045184,establishment of protein localization;GO:0006796,phosphate metabolic process;GO:0050851,antigen receptor-mediated signaling pathway;GO:0065009,regulation of molecular function;GO…	GO:0043228,non-membrane-bounded organelle;GO:0005634,nucleus;GO:0070062,extracellular vesicular exosome;GO:0043229,intracellular organelle;GO:0016023,cytoplasmic membrane-bounded vesicle;GO:0044459,plasma membrane part;GO:0043232,intracellular non-membrane-bounded organelle;GO:0005576,extracellular region;GO:0065010,extracellular membrane-bounded organelle;GO:0044433,cytoplasmic vesicle part;GO:0…	GO:0046872,metal ion binding;GO:0005488,binding;GO:0005515,protein binding;GO:0043169,cation binding;GO:0005198,structural molecule activity;GO:0003735,structural constituent of ribosome;GO:0043167,ion binding	ko03010,Ribosome
1032	sp|Q08431|MFGM_HUMAN	Lactadherin OS=Homo sapiens OX=9606 GN=MFGE8 PE=1 SV=3		down	1	0.772662	0.0423805	biological adhesion;developmental process;metabolic process;reproduction;cellular component organization or biogenesis;regulation of biological process;biological regulation;viral reproduction;localization;multicellular organismal process;reproductive process;positive regulation of biological process;establishment of localization;response to stimulus;cellular process;cell proliferation	extracellular region;cell;cell part;extracellular region part;organelle	binding		Complement and coagulation cascades	GO:0044260,cellular macromolecule metabolic process;GO:0043627,response to estrogen stimulus;GO:0019953,sexual reproduction;GO:0016192,vesicle-mediated transport;GO:0048514,blood vessel morphogenesis;GO:0001525,angiogenesis;GO:0048513,organ development;GO:0050896,response to stimulus;GO:0048522,positive regulation of cellular process;GO:0051234,establishment of localization;GO:0032502,development…	GO:0031012,extracellular matrix;GO:0005886,plasma membrane;GO:0005623,cell;GO:0043230,extracellular organelle;GO:0009986,cell surface;GO:0016020,membrane;GO:0044421,extracellular region part;GO:0031982,vesicle;GO:0019898,extrinsic to membrane;GO:0019897,extrinsic to plasma membrane;GO:0005615,extracellular space;GO:0043227,membrane-bounded organelle;GO:0031988,membrane-bounded vesicle;GO:0065010,…	GO:0005102,receptor binding;GO:0005488,binding;GO:0005515,protein binding;GO:0005178,integrin binding;GO:0032403,protein complex binding;GO:0001786,phosphatidylserine binding;GO:0008289,lipid binding;GO:0005543,phospholipid binding	ko04610,Complement and coagulation cascades
1041	sp|Q8WVX9|FACR1_HUMAN	Fatty acyl-CoA reductase 1 OS=Homo sapiens OX=9606 GN=FAR1 PE=1 SV=1		down	1	0.68675	0.0139862	metabolic process;cellular process	cell part;organelle part;membrane-enclosed lumen;organelle;cell	catalytic activity	Secondary metabolites biosynthesis, transport and catabolism ;	Peroxisome	GO:0008152,metabolic process;GO:0055114,oxidation reduction;GO:0008654,phospholipid biosynthetic process;GO:0044249,cellular biosynthetic process;GO:0009058,biosynthetic process;GO:0044237,cellular metabolic process;GO:0032787,monocarboxylic acid metabolic process;GO:0045017,glycerolipid biosynthetic process;GO:0046474,glycerophospholipid biosynthetic process;GO:0009987,cellular process;GO:004648…	GO:0016020,membrane;GO:0005622,intracellular;GO:0044444,cytoplasmic part;GO:0031974,membrane-enclosed lumen;GO:0031090,organelle membrane;GO:0042579,microbody;GO:0044422,organelle part;GO:0005623,cell;GO:0043233,organelle lumen;GO:0044439,peroxisomal part;GO:0005782,peroxisomal matrix;GO:0044464,cell part;GO:0044438,microbody part;GO:0070013,intracellular organelle lumen;GO:0044446,intracellular …	GO:0016491,oxidoreductase activity;GO:0016903,oxidoreductase activity, acting on the aldehyde or oxo group of donors;GO:0016620,oxidoreductase activity, acting on the aldehyde or oxo group of donors, NAD or NADP as acceptor;GO:0003824,catalytic activity	ko04146,Peroxisome
[truncated: 99 more rows]
