# Supplementary material for: Deciphering The Molecular Mechanism of Long Non-Coding RNA HIFA-AS1 Regulating Pancreatic Cancer Cells
Source: Research Square preprint supplement (doi:10.21203/rs.3.rs-533849/v1), 2021-06-10
Supplement: Supplementary file 4 [file 2d77b3c9bc4fc6535d84ea50.xlsx]

## Sheet: Sheet1
#Pathway	Count	Pathway ID	Proteins	KOs
RNA transport	22	ko03013	sp|O60832|DKC1_HUMAN;sp|O75694|NU155_HUMAN;sp|P11940|PABP1_HUMAN;sp|P23588|IF4B_HUMAN;sp|P38919|IF4A3_HUMAN;sp|P49792|RBP2_HUMAN;sp|P55884|EIF3B_HUMAN;sp|P60228|EIF3E_HUMAN;sp|P78344|IF4G2_HUMAN;sp|P78406|RAE1L_HUMAN;sp|Q04637|IF4G1_HUMAN;sp|Q13347|EIF3I_HUMAN;sp|Q14152|EIF3A_HUMAN;sp|Q14974|IMB1_HUMAN;sp|Q7L1Q6|BZW1_HUMAN;sp|Q8NI27|THOC2_HUMAN;sp|Q8TEQ6|GEMI5_HUMAN;sp|Q99613|EIF3C_HUMAN;sp|Q9BVL…	K11131+K14312+K13126+K03258+K13025+K12172+K03253+K03250+K03260+K14298+K03246+K03254+K14293+K03240+K12879+K13133+K03252+K14307+K14289+K01164
Metabolic pathways	17	ko01100	sp|O15067|PUR4_HUMAN;sp|O43426|SYNJ1_HUMAN;sp|O75534|CSDE1_HUMAN;sp|P06744|G6PI_HUMAN;sp|P07195|LDHB_HUMAN;sp|P12268|IMDH2_HUMAN;sp|P15121|ALDR_HUMAN;sp|P17812|PYRG1_HUMAN;sp|P22102|PUR2_HUMAN;sp|P49327|FAS_HUMAN;sp|P54098|DPOG1_HUMAN;sp|P60174|TPIS_HUMAN;sp|Q01813|PFKAP_HUMAN;sp|Q06210|GFPT1_HUMAN;sp|Q16222|UAP1_HUMAN;sp|Q96R06|SPAG5_HUMAN;sp|Q9NXE4|NSMA3_HUMAN	K01952+K01099+K01490+K01810+K00016+K00088+K00011+K01937+K11787+K00665+K02332+K01803+K00850+K00820+K00972+K05291+K12353
Ribosome	10	ko03010	sp|P05388|RLA0_HUMAN;sp|P18124|RL7_HUMAN;sp|P18621|RL17_HUMAN;sp|P36578|RL4_HUMAN;sp|P39023|RL3_HUMAN;sp|P46777|RL5_HUMAN;sp|P46778|RL21_HUMAN;sp|P62081|RS7_HUMAN;sp|Q02878|RL6_HUMAN;sp|Q9UKD2|MRT4_HUMAN	K02941+K02937+K02880+K02930+K02925+K02932+K02889+K02993+K02934
Spliceosome	8	ko03040	sp|O00567|NOP56_HUMAN;sp|O75400|PR40A_HUMAN;sp|O94906|PRP6_HUMAN;sp|P09012|SNRPA_HUMAN;sp|P38159|RBMX_HUMAN;sp|P38919|IF4A3_HUMAN;sp|Q6P2Q9|PRP8_HUMAN;sp|Q8NI27|THOC2_HUMAN	K12844+K12821+K12855+K11091+K12885+K13025+K12856+K12879
Microbial metabolism in diverse environments	6	ko01120	sp|P06744|G6PI_HUMAN;sp|P07195|LDHB_HUMAN;sp|P46087|NOP2_HUMAN;sp|P60174|TPIS_HUMAN;sp|Q01813|PFKAP_HUMAN;sp|Q08J23|NSUN2_HUMAN	K01810+K00016+K00599+K01803+K00850
Pathogenic Escherichia coli infection	5	ko05130	sp|P05783|K1C18_HUMAN;sp|P08727|K1C19_HUMAN;sp|P15311|EZRI_HUMAN;sp|P19338|NUCL_HUMAN;sp|Q15020|SART3_HUMAN	K07604+K08007+K11294
Protein processing in endoplasmic reticulum	5	ko04141	sp|O95757|HS74L_HUMAN;sp|P07900|HS90A_HUMAN;sp|P08238|HS90B_HUMAN;sp|P17655|CAN2_HUMAN;sp|Q92598|HS105_HUMAN	K09485+K04079+K03853
Purine metabolism	4	ko00230	sp|O15067|PUR4_HUMAN;sp|O75534|CSDE1_HUMAN;sp|P12268|IMDH2_HUMAN;sp|P22102|PUR2_HUMAN	K01952+K01490+K00088+K11787
Glycolysis / Gluconeogenesis	4	ko00010	sp|P06744|G6PI_HUMAN;sp|P07195|LDHB_HUMAN;sp|P60174|TPIS_HUMAN;sp|Q01813|PFKAP_HUMAN	K01810+K00016+K01803+K00850
Focal adhesion	4	ko04510	sp|O60610|DIAP1_HUMAN;sp|P17655|CAN2_HUMAN;sp|P18206|VINC_HUMAN;sp|Q96AC1|FERM2_HUMAN	K05740+K03853+K05700+K06271
Regulation of actin cytoskeleton	4	ko04810	sp|O60610|DIAP1_HUMAN;sp|P06396|GELS_HUMAN;sp|P15311|EZRI_HUMAN;sp|P18206|VINC_HUMAN	K05740+K05768+K08007+K05700
RNA degradation	3	ko03018	sp|P10809|CH60_HUMAN;sp|P38646|GRP75_HUMAN;sp|Q9Y5J1|UTP18_HUMAN	K04077+K04043+K12602
Endocytosis	3	ko04144	sp|Q6DN90|IQEC1_HUMAN;sp|Q8WUM4|PDC6I_HUMAN;sp|Q9UQ80|PA2G4_HUMAN	K12495+K12200+K05084
Progesterone-mediated oocyte maturation	3	ko04914	sp|P07900|HS90A_HUMAN;sp|P08238|HS90B_HUMAN;sp|P14635|CCNB1_HUMAN	K04079+K05868
Fructose and mannose metabolism	3	ko00051	sp|P15121|ALDR_HUMAN;sp|P60174|TPIS_HUMAN;sp|Q01813|PFKAP_HUMAN	K00011+K01803+K00850
Cell cycle	3	ko04110	sp|O60566|BUB1B_HUMAN;sp|O76021|RL1D1_HUMAN;sp|P14635|CCNB1_HUMAN	K06637+K06670+K05868
Antigen processing and presentation	3	ko04612	sp|P07900|HS90A_HUMAN;sp|P08238|HS90B_HUMAN;sp|P34932|HSP74_HUMAN	K04079+K09489
Huntington's disease	3	ko05016	sp|P04179|SODM_HUMAN;sp|P21980|TGM2_HUMAN;sp|Q08752|PPID_HUMAN	K04564+K05625+K05864
Calcium signaling pathway	3	ko04020	sp|P0DP25|CALM3_HUMAN;sp|Q08752|PPID_HUMAN;sp|Q9UQ80|PA2G4_HUMAN	K02183+K05864+K05084
Lysosome	3	ko04142	sp|O43747|AP1G1_HUMAN;sp|P11717|MPRI_HUMAN;sp|P53618|COPB_HUMAN	K12391+K06564+K12396
Amino sugar and nucleotide sugar metabolism	3	ko00520	sp|P06744|G6PI_HUMAN;sp|Q06210|GFPT1_HUMAN;sp|Q16222|UAP1_HUMAN	K01810+K00820+K00972
MAPK signaling pathway	2	ko04010	sp|O60271|JIP4_HUMAN;sp|P46734|MP2K3_HUMAN	K04436+K04432
Staphylococcus aureus infection	2	ko05150	sp|P05783|K1C18_HUMAN;sp|P08727|K1C19_HUMAN	K07604
Oocyte meiosis	2	ko04114	sp|P0DP25|CALM3_HUMAN;sp|P14635|CCNB1_HUMAN	K02183+K05868
Selenoamino acid metabolism	2	ko00450	sp|P46087|NOP2_HUMAN;sp|Q08J23|NSUN2_HUMAN	K00599
Prostate cancer	2	ko05215	sp|P07900|HS90A_HUMAN;sp|P08238|HS90B_HUMAN	K04079
Insulin signaling pathway	2	ko04910	sp|P0DP25|CALM3_HUMAN;sp|P49327|FAS_HUMAN	K02183+K00665
Alzheimer's disease	2	ko05010	sp|P0DP25|CALM3_HUMAN;sp|P17655|CAN2_HUMAN	K02183+K03853
Pyruvate metabolism	2	ko00620	sp|P07195|LDHB_HUMAN;sp|P15121|ALDR_HUMAN	K00016+K00011
Shigellosis	2	ko05131	sp|O60610|DIAP1_HUMAN;sp|P18206|VINC_HUMAN	K05740+K05700
Tyrosine metabolism	2	ko00350	sp|P46087|NOP2_HUMAN;sp|Q08J23|NSUN2_HUMAN	K00599
Galactose metabolism	2	ko00052	sp|P15121|ALDR_HUMAN;sp|Q01813|PFKAP_HUMAN	K00011+K00850
Inositol phosphate metabolism	2	ko00562	sp|O43426|SYNJ1_HUMAN;sp|P60174|TPIS_HUMAN	K01099+K01803
Pathways in cancer	2	ko05200	sp|P07900|HS90A_HUMAN;sp|P08238|HS90B_HUMAN	K04079
Gastric acid secretion	2	ko04971	sp|P0DP25|CALM3_HUMAN;sp|P15311|EZRI_HUMAN	K02183+K08007
Viral myocarditis	2	ko05416	sp|P78344|IF4G2_HUMAN;sp|Q04637|IF4G1_HUMAN	K03260
Leukocyte transendothelial migration	2	ko04670	sp|P15311|EZRI_HUMAN;sp|P18206|VINC_HUMAN	K08007+K05700
GnRH signaling pathway	2	ko04912	sp|P0DP25|CALM3_HUMAN;sp|P46734|MP2K3_HUMAN	K02183+K04432
Phosphatidylinositol signaling system	2	ko04070	sp|O43426|SYNJ1_HUMAN;sp|P0DP25|CALM3_HUMAN	K01099+K02183
Pentose phosphate pathway	2	ko00030	sp|P06744|G6PI_HUMAN;sp|Q01813|PFKAP_HUMAN	K01810+K00850
Histidine metabolism	2	ko00340	sp|P46087|NOP2_HUMAN;sp|Q08J23|NSUN2_HUMAN	K00599
Toll-like receptor signaling pathway	2	ko04620	sp|P46734|MP2K3_HUMAN;sp|Q9Y3B3|TMED7_HUMAN	K04432+K05409
NOD-like receptor signaling pathway	2	ko04621	sp|P07900|HS90A_HUMAN;sp|P08238|HS90B_HUMAN	K04079
Aminoacyl-tRNA biosynthesis	2	ko00970	sp|Q15046|SYK_HUMAN;sp|Q9NSD9|SYFB_HUMAN	K04567+K01890
Lysine degradation	1	ko00310	sp|Q9Y5J1|UTP18_HUMAN	K11422
p53 signaling pathway	1	ko04115	sp|P14635|CCNB1_HUMAN	K05868
Glycosylphosphatidylinositol(GPI)-anchor biosynthesis	1	ko00563	sp|Q96R06|SPAG5_HUMAN	K05291
Ubiquitin mediated proteolysis	1	ko04120	sp|Q16763|UBE2S_HUMAN	K10583
Amyotrophic lateral sclerosis (ALS)	1	ko05014	sp|P46734|MP2K3_HUMAN	K04432
Drug metabolism - other enzymes	1	ko00983	sp|P12268|IMDH2_HUMAN	K00088
Porphyrin and chlorophyll metabolism	1	ko00860	sp|P53701|CCHL_HUMAN	K01764
Vascular smooth muscle contraction	1	ko04270	sp|P0DP25|CALM3_HUMAN	K02183
Parkinson's disease	1	ko05012	sp|Q08752|PPID_HUMAN	K05864
Bacterial invasion of epithelial cells	1	ko05100	sp|P18206|VINC_HUMAN	K05700
Pyrimidine metabolism	1	ko00240	sp|P17812|PYRG1_HUMAN	K01937
Adherens junction	1	ko04520	sp|P18206|VINC_HUMAN	K05700
Glycerolipid metabolism	1	ko00561	sp|P15121|ALDR_HUMAN	K00011
Phototransduction	1	ko04744	sp|P0DP25|CALM3_HUMAN	K02183
Propanoate metabolism	1	ko00640	sp|P07195|LDHB_HUMAN	K00016
Vasopressin-regulated water reabsorption	1	ko04962	sp|Q14204|DYHC1_HUMAN	K10413
Sphingolipid metabolism	1	ko00600	sp|Q9NXE4|NSMA3_HUMAN	K12353
Long-term potentiation	1	ko04720	sp|P0DP25|CALM3_HUMAN	K02183
Glioma	1	ko05214	sp|P0DP25|CALM3_HUMAN	K02183
Peroxisome	1	ko04146	sp|P04179|SODM_HUMAN	K04564
RIG-I-like receptor signaling pathway	1	ko04622	sp|O00571|DDX3X_HUMAN	K11594
Non-homologous end-joining	1	ko03450	sp|P13010|XRCC5_HUMAN	K10885
Fatty acid biosynthesis	1	ko00061	sp|P49327|FAS_HUMAN	K00665
Tight junction	1	ko04530	sp|Q96JQ2|CLMN_HUMAN	K06115
Type I diabetes mellitus	1	ko04940	sp|P10809|CH60_HUMAN	K04077
mTOR signaling pathway	1	ko04150	sp|P23588|IF4B_HUMAN	K03258
Starch and sucrose metabolism	1	ko00500	sp|P06744|G6PI_HUMAN	K01810
Fc gamma R-mediated phagocytosis	1	ko04666	sp|P06396|GELS_HUMAN	K05768
Neurotrophin signaling pathway	1	ko04722	sp|P0DP25|CALM3_HUMAN	K02183
Cysteine and methionine metabolism	1	ko00270	sp|P07195|LDHB_HUMAN	K00016
Phototransduction - fly	1	ko04745	sp|P0DP25|CALM3_HUMAN	K02183
Olfactory transduction	1	ko04740	sp|P0DP25|CALM3_HUMAN	K02183
Toxoplasmosis	1	ko05145	sp|P46734|MP2K3_HUMAN	K04432
Wnt signaling pathway	1	ko04310	sp|Q9NZU5|LMCD1_HUMAN	K04511
Melanogenesis	1	ko04916	sp|P0DP25|CALM3_HUMAN	K02183
Pentose and glucuronate interconversions	1	ko00040	sp|P15121|ALDR_HUMAN	K00011
Phagosome	1	ko04145	sp|Q14204|DYHC1_HUMAN	K10413
One carbon pool by folate	1	ko00670	sp|P22102|PUR2_HUMAN	K11787
Amoebiasis	1	ko05146	sp|P18206|VINC_HUMAN	K05700
Alanine, aspartate and glutamate metabolism	1	ko00250	sp|Q06210|GFPT1_HUMAN	K00820
Fc epsilon RI signaling pathway	1	ko04664	sp|P46734|MP2K3_HUMAN	K04432
Proteasome	1	ko03050	sp|P35998|PRS7_HUMAN	K03061
Dilated cardiomyopathy	1	ko05414	sp|Q86TC9|MYPN_HUMAN	K12567
Hypertrophic cardiomyopathy (HCM)	1	ko05410	sp|Q86TC9|MYPN_HUMAN	K12567
Salivary secretion	1	ko04970	sp|P0DP25|CALM3_HUMAN	K02183
Hepatitis C	1	ko05160	sp|P60228|EIF3E_HUMAN	K03250
Apoptosis	1	ko04210	sp|P17655|CAN2_HUMAN	K03853
Prion diseases	1	ko05020	sp|P31948|STIP1_HUMAN	K09553
ErbB signaling pathway	1	ko04012	sp|Q9UQ80|PA2G4_HUMAN	K05084
