# Supplementary material for: Deciphering The Molecular Mechanism of Long Non-Coding RNA HIFA-AS1 Regulating Pancreatic Cancer Cells
Source: Research Square preprint supplement (doi:10.21203/rs.3.rs-533849/v1), 2021-06-10
Supplement: Supplementary file 5 [file 45c5719d8a402ae6d403a7da.xlsx]

## Sheet: Sheet1
#Pathway	Count	Pathway ID	Proteins	KOs
Metabolic pathways	28	ko01100	sp|O43175|SERA_HUMAN;sp|O75874|IDHC_HUMAN;sp|P04406|G3P_HUMAN;sp|P04843|RPN1_HUMAN;sp|P04844|RPN2_HUMAN;sp|P09669|COX6C_HUMAN;sp|P11177|ODPB_HUMAN;sp|P13073|COX41_HUMAN;sp|P13674|P4HA1_HUMAN;sp|P13995|MTDC_HUMAN;sp|P14618|KPYM_HUMAN;sp|P15144|AMPN_HUMAN;sp|P15586|GNS_HUMAN;sp|P22307|NLTP_HUMAN;sp|P23919|KTHY_HUMAN;sp|P28838|AMPL_HUMAN;sp|P40939|ECHA_HUMAN;sp|P46977|STT3A_HUMAN;sp|P49748|ACADV_HUM…	K00058+K00031+K00134+K12666+K12667+K02268+K00162+K02263+K00472+K13403+K00873+K11140+K01137+K08764+K00943+K11142+K07515+K07151+K09479+K12405+K00323+K05546+K01596+K01081+K00665+K00923+K03008+K01487+K00831
Protein processing in endoplasmic reticulum	20	ko04141	sp|P04843|RPN1_HUMAN;sp|P04844|RPN2_HUMAN;sp|P07237|PDIA1_HUMAN;sp|P0DMV9|HS71B_HUMAN;sp|P13667|PDIA4_HUMAN;sp|P14625|ENPL_HUMAN;sp|P19525|E2AK2_HUMAN;sp|P27797|CALR_HUMAN;sp|P30040|ERP29_HUMAN;sp|P30101|PDIA3_HUMAN;sp|P31689|DNJA1_HUMAN;sp|P46977|STT3A_HUMAN;sp|P55072|TERA_HUMAN;sp|Q14697|GANAB_HUMAN;sp|Q15084|PDIA6_HUMAN;sp|Q86UP2|KTN1_HUMAN;sp|Q8NBS9|TXND5_HUMAN;sp|Q9NYU2|UGGG1_HUMAN;sp|Q9P2E9…	K12666+K12667+K09580+K03283+K09582+K09487+K08860+K08057+K09586+K08056+K09502+K07151+K13525+K05546+K09584+K14000+K13984+K11718+K09486
Pathways in cancer	10	ko05200	sp|P05556|ITB1_HUMAN;sp|P06756|ITAV_HUMAN;sp|P14625|ENPL_HUMAN;sp|P14923|PLAK_HUMAN;sp|P23229|ITA6_HUMAN;sp|P26006|ITA3_HUMAN;sp|P29590|PML_HUMAN;sp|P35221|CTNA1_HUMAN;sp|P42224|STAT1_HUMAN;sp|Q68CZ2|TENS3_HUMAN	K05719+K06487+K09487+K10056+K06485+K06482+K10054+K05691+K11220+K01110
Arrhythmogenic right ventricular cardiomyopathy (ARVC)	9	ko05412	sp|P02545|LMNA_HUMAN;sp|P05556|ITB1_HUMAN;sp|P06756|ITAV_HUMAN;sp|P14923|PLAK_HUMAN;sp|P16144|ITB4_HUMAN;sp|P23229|ITA6_HUMAN;sp|P26006|ITA3_HUMAN;sp|P35221|CTNA1_HUMAN;sp|P54289|CA2D1_HUMAN	K12641+K05719+K06487+K10056+K06525+K06485+K06482+K05691+K04858
Microbial metabolism in diverse environments	8	ko01120	sp|O43175|SERA_HUMAN;sp|O75874|IDHC_HUMAN;sp|P04406|G3P_HUMAN;sp|P11177|ODPB_HUMAN;sp|P14618|KPYM_HUMAN;sp|P40939|ECHA_HUMAN;sp|Q16822|PCKGM_HUMAN;sp|Q9Y617|SERC_HUMAN	K00058+K00031+K00134+K00162+K00873+K07515+K01596+K00831
Regulation of actin cytoskeleton	8	ko04810	sp|P05556|ITB1_HUMAN;sp|P06756|ITAV_HUMAN;sp|P16144|ITB4_HUMAN;sp|P23229|ITA6_HUMAN;sp|P26006|ITA3_HUMAN;sp|P26038|MOES_HUMAN;sp|P46940|IQGA1_HUMAN;sp|P62328|TYB4_HUMAN	K05719+K06487+K06525+K06485+K06482+K05763+K05767+K05764
Tight junction	7	ko04530	sp|P13797|PLST_HUMAN;sp|P35221|CTNA1_HUMAN;sp|Q01082|SPTB2_HUMAN;sp|Q03169|TNAP2_HUMAN;sp|Q13813|SPTN1_HUMAN;sp|Q14847|LASP1_HUMAN;sp|Q68CZ2|TENS3_HUMAN	K06115+K05691+K06110+K06114+K06106+K01110
Hypertrophic cardiomyopathy (HCM)	7	ko05410	sp|P02545|LMNA_HUMAN;sp|P05556|ITB1_HUMAN;sp|P06756|ITAV_HUMAN;sp|P16144|ITB4_HUMAN;sp|P23229|ITA6_HUMAN;sp|P26006|ITA3_HUMAN;sp|P54289|CA2D1_HUMAN	K12641+K05719+K06487+K06525+K06485+K06482+K04858
Peroxisome	7	ko04146	sp|O75874|IDHC_HUMAN;sp|P22307|NLTP_HUMAN;sp|P28288|ABCD3_HUMAN;sp|P30044|PRDX5_HUMAN;sp|P51659|DHB4_HUMAN;sp|Q13011|ECH1_HUMAN;sp|Q8WVX9|FACR1_HUMAN	K00031+K08764+K05677+K11187+K12405+K12663+K13356
Dilated cardiomyopathy	7	ko05414	sp|P02545|LMNA_HUMAN;sp|P05556|ITB1_HUMAN;sp|P06756|ITAV_HUMAN;sp|P16144|ITB4_HUMAN;sp|P23229|ITA6_HUMAN;sp|P26006|ITA3_HUMAN;sp|P54289|CA2D1_HUMAN	K12641+K05719+K06487+K06525+K06485+K06482+K04858
Hepatitis C	7	ko05160	sp|O14879|IFIT3_HUMAN;sp|O95786|DDX58_HUMAN;sp|P09913|IFIT2_HUMAN;sp|P09914|IFIT1_HUMAN;sp|P19525|E2AK2_HUMAN;sp|P42224|STAT1_HUMAN;sp|Q9Y6K5|OAS3_HUMAN	K14217+K12646+K08860+K11220+K14216
Phagosome	6	ko04145	sp|P05556|ITB1_HUMAN;sp|P06756|ITAV_HUMAN;sp|P20645|MPRD_HUMAN;sp|P27797|CALR_HUMAN;sp|Q03519|TAP2_HUMAN;sp|Q9BQE3|TBA1C_HUMAN	K05719+K06487+K10089+K08057+K05654+K07374
Endocytosis	6	ko04144	sp|P0DMV9|HS71B_HUMAN;sp|P20591|MX1_HUMAN;sp|P29590|PML_HUMAN;sp|Q14677|EPN4_HUMAN;sp|Q14847|LASP1_HUMAN;sp|Q9NZZ3|CHMP5_HUMAN	K03283+K01528+K10054+K12471+K11247+K12198
Focal adhesion	6	ko04510	sp|P05556|ITB1_HUMAN;sp|P06756|ITAV_HUMAN;sp|P16144|ITB4_HUMAN;sp|P23229|ITA6_HUMAN;sp|P26006|ITA3_HUMAN;sp|Q68CZ2|TENS3_HUMAN	K05719+K06487+K06525+K06485+K06482+K01110
Huntington's disease	5	ko05016	sp|O00170|AIP_HUMAN;sp|P09669|COX6C_HUMAN;sp|P13073|COX41_HUMAN;sp|Q99426|TBCB_HUMAN;sp|Q9BSJ8|ESYT1_HUMAN	K05864+K02268+K02263+K04648+K03008
Purine metabolism	5	ko00230	sp|P14618|KPYM_HUMAN;sp|Q5TFE4|NT5D1_HUMAN;sp|Q8TCS8|PNPT1_HUMAN;sp|Q9BSJ8|ESYT1_HUMAN;sp|Q9Y2T3|GUAD_HUMAN	K00873+K01081+K00962+K03008+K01487
ECM-receptor interaction	5	ko04512	sp|P05556|ITB1_HUMAN;sp|P06756|ITAV_HUMAN;sp|P16144|ITB4_HUMAN;sp|P23229|ITA6_HUMAN;sp|P26006|ITA3_HUMAN	K05719+K06487+K06525+K06485+K06482
Toxoplasmosis	5	ko05145	sp|P05556|ITB1_HUMAN;sp|P0DMV9|HS71B_HUMAN;sp|P23229|ITA6_HUMAN;sp|P42224|STAT1_HUMAN;sp|Q99836|MYD88_HUMAN	K05719+K03283+K06485+K11220+K04729
Small cell lung cancer	5	ko05222	sp|P05556|ITB1_HUMAN;sp|P06756|ITAV_HUMAN;sp|P23229|ITA6_HUMAN;sp|P26006|ITA3_HUMAN;sp|Q68CZ2|TENS3_HUMAN	K05719+K06487+K06485+K06482+K01110
Parkinson's disease	5	ko05012	sp|O00170|AIP_HUMAN;sp|P09669|COX6C_HUMAN;sp|P13073|COX41_HUMAN;sp|P22314|UBA1_HUMAN;sp|Q9UHD8|SEPT9_HUMAN	K05864+K02268+K02263+K03178+K04557
Pyrimidine metabolism	4	ko00240	sp|P23919|KTHY_HUMAN;sp|Q5TFE4|NT5D1_HUMAN;sp|Q8TCS8|PNPT1_HUMAN;sp|Q9BSJ8|ESYT1_HUMAN	K00943+K01081+K00962+K03008
Leukocyte transendothelial migration	4	ko04670	sp|P05362|ICAM1_HUMAN;sp|P05556|ITB1_HUMAN;sp|P26038|MOES_HUMAN;sp|P35221|CTNA1_HUMAN	K06490+K05719+K05763+K05691
Alzheimer's disease	4	ko05010	sp|P04406|G3P_HUMAN;sp|P09669|COX6C_HUMAN;sp|P13073|COX41_HUMAN;sp|P19525|E2AK2_HUMAN	K00134+K02268+K02263+K08860
N-Glycan biosynthesis	4	ko00510	sp|P04843|RPN1_HUMAN;sp|P04844|RPN2_HUMAN;sp|P46977|STT3A_HUMAN;sp|Q14697|GANAB_HUMAN	K12666+K12667+K07151+K05546
Cell adhesion molecules (CAMs)	4	ko04514	sp|P05362|ICAM1_HUMAN;sp|P05556|ITB1_HUMAN;sp|P06756|ITAV_HUMAN;sp|P23229|ITA6_HUMAN	K06490+K05719+K06487+K06485
Pathogenic Escherichia coli infection	4	ko05130	sp|P05556|ITB1_HUMAN;sp|P27348|1433T_HUMAN;sp|Q14847|LASP1_HUMAN;sp|Q9BQE3|TBA1C_HUMAN	K05719+K06630+K06106+K07374
Antigen processing and presentation	4	ko04612	sp|P0DMV9|HS71B_HUMAN;sp|P27797|CALR_HUMAN;sp|P30101|PDIA3_HUMAN;sp|Q03519|TAP2_HUMAN	K03283+K08057+K08056+K05654
Bacterial invasion of epithelial cells	4	ko05100	sp|P05556|ITB1_HUMAN;sp|P20591|MX1_HUMAN;sp|P35221|CTNA1_HUMAN;sp|Q14847|LASP1_HUMAN	K05719+K01528+K05691+K06106
Glycolysis / Gluconeogenesis	4	ko00010	sp|P04406|G3P_HUMAN;sp|P11177|ODPB_HUMAN;sp|P14618|KPYM_HUMAN;sp|Q16822|PCKGM_HUMAN	K00134+K00162+K00873+K01596
Glutathione metabolism	4	ko00480	sp|O75874|IDHC_HUMAN;sp|P15144|AMPN_HUMAN;sp|P28838|AMPL_HUMAN;sp|P36969|GPX4_HUMAN	K00031+K11140+K11142+K05361
Lysosome	3	ko04142	sp|P07339|CATD_HUMAN;sp|P15586|GNS_HUMAN;sp|P20645|MPRD_HUMAN	K01379+K01137+K10089
Insulin signaling pathway	3	ko04910	sp|P11216|PYGB_HUMAN;sp|Q16822|PCKGM_HUMAN;sp|Q68CZ2|TENS3_HUMAN	K00688+K01596+K00665
Cardiac muscle contraction	3	ko04260	sp|P09669|COX6C_HUMAN;sp|P13073|COX41_HUMAN;sp|P54289|CA2D1_HUMAN	K02268+K02263+K04858
Citrate cycle (TCA cycle)	3	ko00020	sp|O75874|IDHC_HUMAN;sp|P11177|ODPB_HUMAN;sp|Q16822|PCKGM_HUMAN	K00031+K00162+K01596
Lysine degradation	3	ko00310	sp|O60568|PLOD3_HUMAN;sp|P40939|ECHA_HUMAN;sp|Q02809|PLOD1_HUMAN	K13646+K07515+K00473
Hematopoietic cell lineage	3	ko04640	sp|P15144|AMPN_HUMAN;sp|P23229|ITA6_HUMAN;sp|P26006|ITA3_HUMAN	K11140+K06485+K06482
Leishmaniasis	3	ko05140	sp|P05556|ITB1_HUMAN;sp|P42224|STAT1_HUMAN;sp|Q99836|MYD88_HUMAN	K05719+K11220+K04729
Pyruvate metabolism	3	ko00620	sp|P11177|ODPB_HUMAN;sp|P14618|KPYM_HUMAN;sp|Q16822|PCKGM_HUMAN	K00162+K00873+K01596
RIG-I-like receptor signaling pathway	3	ko04622	sp|O95786|DDX58_HUMAN;sp|P05161|ISG15_HUMAN;sp|Q9BYX4|IFIH1_HUMAN	K12646+K12159+K12647
MAPK signaling pathway	3	ko04010	sp|P0DMV9|HS71B_HUMAN;sp|P16949|STMN1_HUMAN;sp|P54289|CA2D1_HUMAN	K03283+K04381+K04858
PPAR signaling pathway	3	ko03320	sp|O60664|PLIN3_HUMAN;sp|P22307|NLTP_HUMAN;sp|Q16822|PCKGM_HUMAN	K08768+K08764+K01596
ABC transporters	3	ko02010	sp|P28288|ABCD3_HUMAN;sp|P33527|MRP1_HUMAN;sp|Q03519|TAP2_HUMAN	K05677+K05665+K05654
Acute myeloid leukemia	2	ko05221	sp|P14923|PLAK_HUMAN;sp|P29590|PML_HUMAN	K10056+K10054
Axon guidance	2	ko04360	sp|P05556|ITB1_HUMAN;sp|Q16555|DPYL2_HUMAN	K05719+K07528
Primary bile acid biosynthesis	2	ko00120	sp|P22307|NLTP_HUMAN;sp|P51659|DHB4_HUMAN	K08764+K12405
Prostate cancer	2	ko05215	sp|P14625|ENPL_HUMAN;sp|Q68CZ2|TENS3_HUMAN	K09487+K01110
Glycine, serine and threonine metabolism	2	ko00260	sp|O43175|SERA_HUMAN;sp|Q9Y617|SERC_HUMAN	K00058+K00831
Fatty acid metabolism	2	ko00071	sp|P40939|ECHA_HUMAN;sp|P49748|ACADV_HUMAN	K07515+K09479
Ubiquitin mediated proteolysis	2	ko04120	sp|P22314|UBA1_HUMAN;sp|P29590|PML_HUMAN	K03178+K10054
Phosphatidylinositol signaling system	2	ko04070	sp|Q68CZ2|TENS3_HUMAN;sp|Q9BSJ8|ESYT1_HUMAN	K01110+K00923
Butanoate metabolism	2	ko00650	sp|P11177|ODPB_HUMAN;sp|P40939|ECHA_HUMAN	K00162+K07515
Tryptophan metabolism	2	ko00380	sp|P23381|SYWC_HUMAN;sp|P40939|ECHA_HUMAN	K01867+K07515
Neurotrophin signaling pathway	2	ko04722	sp|P27348|1433T_HUMAN;sp|Q63ZY3|KANK2_HUMAN	K06630+K12460
Arginine and proline metabolism	2	ko00330	sp|P13674|P4HA1_HUMAN;sp|P28838|AMPL_HUMAN	K00472+K11142
Systemic lupus erythematosus	2	ko05322	sp|Q460N5|PAR14_HUMAN;sp|Q5SSJ5|HP1B3_HUMAN	K11251+K11252
Fc gamma R-mediated phagocytosis	2	ko04666	sp|P20591|MX1_HUMAN;sp|P29966|MARCS_HUMAN	K01528+K12561
Toll-like receptor signaling pathway	2	ko04620	sp|P42224|STAT1_HUMAN;sp|Q99836|MYD88_HUMAN	K11220+K04729
Protein digestion and absorption	2	ko04974	sp|P08195|4F2_HUMAN;sp|P39060|COIA1_HUMAN	K06519+K06823
Inositol phosphate metabolism	2	ko00562	sp|Q68CZ2|TENS3_HUMAN;sp|Q9BSJ8|ESYT1_HUMAN	K01110+K00923
Biosynthesis of unsaturated fatty acids	2	ko01040	sp|O00154|BACH_HUMAN;sp|P40939|ECHA_HUMAN	K01068+K07515
Nicotinate and nicotinamide metabolism	2	ko00760	sp|Q13423|NNTM_HUMAN;sp|Q5TFE4|NT5D1_HUMAN	K00323+K01081
Cytosolic DNA-sensing pathway	2	ko04623	sp|O95786|DDX58_HUMAN;sp|P55265|DSRAD_HUMAN	K12646+K12968
Malaria	2	ko05144	sp|P05362|ICAM1_HUMAN;sp|Q99836|MYD88_HUMAN	K06490+K04729
Aminoacyl-tRNA biosynthesis	2	ko00970	sp|P02768|ALBU_HUMAN;sp|P23381|SYWC_HUMAN	K01883+K01867
Oxidative phosphorylation	2	ko00190	sp|P09669|COX6C_HUMAN;sp|P13073|COX41_HUMAN	K02268+K02263
Shigellosis	2	ko05131	sp|P05556|ITB1_HUMAN;sp|Q14847|LASP1_HUMAN	K05719+K06106
Adherens junction	2	ko04520	sp|P35221|CTNA1_HUMAN;sp|P46940|IQGA1_HUMAN	K05691+K05767
Endometrial cancer	2	ko05213	sp|P35221|CTNA1_HUMAN;sp|Q68CZ2|TENS3_HUMAN	K05691+K01110
Chagas disease	2	ko05142	sp|P27797|CALR_HUMAN;sp|Q99836|MYD88_HUMAN	K08057+K04729
Cell cycle	2	ko04110	sp|P27348|1433T_HUMAN;sp|P33991|MCM4_HUMAN	K06630+K02212
Vitamin B6 metabolism	1	ko00750	sp|Q9Y617|SERC_HUMAN	K00831
Homologous recombination	1	ko03440	sp|Q14527|HLTF_HUMAN	K10875
Glyoxylate and dicarboxylate metabolism	1	ko00630	sp|P13995|MTDC_HUMAN	K13403
Type II diabetes mellitus	1	ko04930	sp|P14618|KPYM_HUMAN	K00873
Chemokine signaling pathway	1	ko04062	sp|P42224|STAT1_HUMAN	K11220
Natural killer cell mediated cytotoxicity	1	ko04650	sp|P05362|ICAM1_HUMAN	K06490
Adipocytokine signaling pathway	1	ko04920	sp|Q16822|PCKGM_HUMAN	K01596
Calcium signaling pathway	1	ko04020	sp|O00170|AIP_HUMAN	K05864
RNA polymerase	1	ko03020	sp|Q9BSJ8|ESYT1_HUMAN	K03008
Fatty acid elongation in mitochondria	1	ko00062	sp|P40939|ECHA_HUMAN	K07515
Gap junction	1	ko04540	sp|Q9BQE3|TBA1C_HUMAN	K07374
Primary immunodeficiency	1	ko05340	sp|Q03519|TAP2_HUMAN	K05654
Valine, leucine and isoleucine degradation	1	ko00280	sp|P40939|ECHA_HUMAN	K07515
Pancreatic cancer	1	ko05212	sp|P42224|STAT1_HUMAN	K11220
Apoptosis	1	ko04210	sp|Q99836|MYD88_HUMAN	K04729
Oocyte meiosis	1	ko04114	sp|P27348|1433T_HUMAN	K06630
Ribosome	1	ko03010	sp|P62979|RS27A_HUMAN	K02977
Renin-angiotensin system	1	ko04614	sp|P15144|AMPN_HUMAN	K11140
RNA degradation	1	ko03018	sp|Q8TCS8|PNPT1_HUMAN	K00962
Spliceosome	1	ko03040	sp|P0DMV9|HS71B_HUMAN	K03283
RNA transport	1	ko03013	sp|Q9BYK8|HELZ2_HUMAN	K14326
Glycosaminoglycan degradation	1	ko00531	sp|P15586|GNS_HUMAN	K01137
Proximal tubule bicarbonate reclamation	1	ko04964	sp|Q16822|PCKGM_HUMAN	K01596
NOD-like receptor signaling pathway	1	ko04621	sp|P14625|ENPL_HUMAN	K09487
One carbon pool by folate	1	ko00670	sp|P13995|MTDC_HUMAN	K13403
mTOR signaling pathway	1	ko04150	sp|O15162|PLS1_HUMAN	K08267
Glioma	1	ko05214	sp|Q68CZ2|TENS3_HUMAN	K01110
Propanoate metabolism	1	ko00640	sp|P40939|ECHA_HUMAN	K07515
p53 signaling pathway	1	ko04115	sp|Q68CZ2|TENS3_HUMAN	K01110
Prion diseases	1	ko05020	sp|P0DMV9|HS71B_HUMAN	K03283
Viral myocarditis	1	ko05416	sp|P05362|ICAM1_HUMAN	K06490
Vibrio cholerae infection	1	ko05110	sp|P13667|PDIA4_HUMAN	K09582
Complement and coagulation cascades	1	ko04610	sp|Q08431|MFGM_HUMAN	K03902
DNA replication	1	ko03030	sp|P33991|MCM4_HUMAN	K02212
Starch and sucrose metabolism	1	ko00500	sp|P11216|PYGB_HUMAN	K00688
beta-Alanine metabolism	1	ko00410	sp|P40939|ECHA_HUMAN	K07515
Vasopressin-regulated water reabsorption	1	ko04962	sp|Q99426|TBCB_HUMAN	K04648
Fatty acid biosynthesis	1	ko00061	sp|Q68CZ2|TENS3_HUMAN	K00665
Staphylococcus aureus infection	1	ko05150	sp|P05362|ICAM1_HUMAN	K06490
Melanoma	1	ko05218	sp|Q68CZ2|TENS3_HUMAN	K01110
Basal transcription factors	1	ko03022	sp|P78347|GTF2I_HUMAN	K03121
Valine, leucine and isoleucine biosynthesis	1	ko00290	sp|P11177|ODPB_HUMAN	K00162
Jak-STAT signaling pathway	1	ko04630	sp|P42224|STAT1_HUMAN	K11220
